*Niemeyer, M., et al*

**Running head:**

**Degron flexibility enforces auxin sensing**

Keywords: intrinsic disorder, degron, auxin, AUX/IAA, SCF<sup>TIR1</sup>, phytohormones, allostery

Corresponding Author:

Luz Irina A. Calderón Villalobos

Molecular Signal Processing Department

Leibniz Institute of Plant Biochemistry (IPB)

Weinberg 3, D-06120 Halle (Saale)

Germany

Email: [LuzIrina.Calderon@ipb-halle.de](mailto:LuzIrina.Calderon@ipb-halle.de)

Tel. +49 345 5582 1232

Fax. +49 345 5582 1209

Niemeyer, M., et al

## **Flexibility of intrinsically disordered degrons in AUX/IAA proteins reinforces auxin receptor assemblies**

Michael Niemeyer<sup>1</sup>, Elena Moreno Castillo<sup>1</sup>, Christian H. Ihling<sup>2</sup>, Claudio Iacobucci<sup>2</sup>, Verona Wilde<sup>1</sup>, Antje Hellmuth<sup>1</sup>, Wolfgang Hoehenwarter<sup>3</sup>, Sophia L. Samodelov<sup>4,6</sup>, Matias D. Zurbriggen<sup>4</sup>, Panagiotis L. Kastritis<sup>5,7,8</sup>, Andrea Sinz<sup>2</sup>, Luz Irina A. Calderón Villalobos<sup>1\*</sup>

<sup>1</sup>*Department of Molecular Signal Processing, Leibniz Institute of Plant Biochemistry (IPB), Weinberg 3, D-06120 Halle (Saale), Germany;* <sup>2</sup>*Department of Pharmaceutical Chemistry & Bioanalytics, Institute of Pharmacy, Martin-Luther University Halle-Wittenberg, Charles Tanford Protein Center, Kurt-Mothes-Str. 3a, D-06120 Halle (Saale) , Germany;* <sup>3</sup>*Proteome Analytics Research Group Leibniz Institute of Plant Biochemistry (IPB), Weinberg 3, D-06120 Halle (Saale), Germany;* <sup>4</sup>*Institute of Synthetic Biology & Cluster of Excellence on Plant Science (CEPLAS), Heinrich-Heine University of Düsseldorf, Universitätsstrasse 1, D-40225 Düsseldorf, Germany;* <sup>5</sup>*Interdisciplinary Research Center HALOmem, Charles Tanford Protein Center, Martin Luther University Halle-Wittenberg, Kurt-Mothes-Straße 3a, D-06120 Halle (Saale), Germany;* <sup>6</sup>*UniversitätsSpital Zürich, Rämistrasse 100, CH-8091 Zürich, Switzerland;* <sup>7</sup>*Institute of Biochemistry and Biotechnology, Martin-Luther University Halle-Wittenberg, Kurt-Mothes-Straße 3, D-06120 Halle (Saale), Germany;* <sup>8</sup>*Biozentrum, Martin Luther University Halle-Wittenberg, Weinbergweg 22, Halle/Saale, Germany*

\*Corresponding author. Email: [LuzIrina.Calderon@ipb-halle.de](mailto:LuzIrina.Calderon@ipb-halle.de)

*Niemeyer, M., et al*

1 **ABSTRACT (139 words)**

2 Cullin RING-type E3 ubiquitin ligases SCF<sup>TIR1/AFB1-5</sup> and their ubiquitylation targets,  
3 AUX/IAAs, sense auxin concentrations in the nucleus. TIR1 binds a surface-  
4 exposed degron in AUX/IAAs promoting their ubiquitylation and rapid auxin-  
5 regulated proteasomal degradation. Here, we resolved TIR1·auxin-IAA7 and  
6 TIR1·auxin-IAA12 complex topology, and show that flexible intrinsically disordered  
7 regions (IDRs) in the degron's vicinity, cooperatively position AUX/IAAs on TIR1. The  
8 AUX/IAA PB1 interaction domain also assists in non-native contacts, affecting  
9 AUX/IAA dynamic interaction states. Our results establish a role for IDRs in  
10 modulating auxin receptor assemblies. By securing AUX/IAAs on two opposite  
11 surfaces of TIR1, IDR diversity supports locally tailored positioning for targeted  
12 ubiquitylation, and might provide conformational flexibility for adopting a multiplicity  
13 of functional states. We postulate IDRs in distinct members of the AUX/IAA family to  
14 be an adaptive signature for protein interaction and initiation region for proteasome  
15 recruitment.

*Niemeyer, M., et al*

16 **Main text**

17 Proteolysis entails tight spatiotemporal regulation of cellular protein pools <sup>1,2</sup>. Ubiquitin-  
18 proteasome system (UPS) rules over protein turnover, and controls stimulation or  
19 attenuation of gene regulatory networks, depending on whether a degradation target  
20 is a transcriptional repressor or activator <sup>2</sup>. A typical E1-E2-E3 enzymatic cascade  
21 warrants specific target ubiquitylation by catalyzing the ATP-dependent attachment of  
22 ubiquitin moieties to the target <sup>3</sup>. Directly and indirectly, every single aspect of cellular  
23 integrity and adaptation is impacted by target ubiquitylation, e.g. cell cycle progression,  
24 apoptosis/survival, oxidative stress, differentiation and senescence <sup>4</sup>. In  
25 SKP1/CULLIN1/F-BOX PROTEIN (SCF)-type E3 ubiquitin ligases, the  
26 interchangeable F-BOX PROTEIN (FBP) determines specificity to the E3 through  
27 direct physical interactions with the degradation target <sup>5,6</sup>. UPS targets carry a short  
28 degradation signal or degron, located mostly within structurally disordered regions,  
29 which is precisely recognized by cognate E3 ligases <sup>7</sup>. Structural disorder and  
30 conformational flexibility within UPS targets confer diversity and specificity on  
31 regulated protein ubiquitylation and degradation <sup>7</sup>. Posttranslational modifications  
32 (PTMs) also often switch primary degrons into E3-competent binding motifs <sup>7</sup>. Primary  
33 degrons within a protein family, whose members share the same fate, behave as  
34 islands of sequence conservation surrounded by fast divergent intrinsically disordered  
35 regions (IDRs) <sup>7</sup>. Once a favorable E3-target association stage has been  
36 accomplished, one or multiple lysines residues neighboring IDRs of the target, often  
37 within 20 residues, form a ubiquitylation zone of functional exposed ubiquitylation sites  
38 <sup>8-10</sup>. Next, local disorder and conformational flexibility brings an E2-loaded with Ub  
39 (E2~Ub) into close proximity to the bound target, such that a suitable  
40 microenvironment for catalytic Ub transfer to exposed lysine residues is created <sup>7</sup>.

*Niemeyer, M., et al*

41 Efficient degradation of UPS targets requires the 26S proteasome to bind its protein  
42 target through a polyubiquitin chain with a specific topology, and subsequently  
43 engages the protein at a flexible initiation region for unfolding and degradation <sup>11</sup>. A  
44 primary degron for E3 recruitment, a ubiquitin chain, and an IDR in UPS targets build  
45 a tripartite degron, required for efficient proteasome-mediated degradation <sup>7</sup>.

46 Intrinsically disordered proteins (IDPs) often function in processes that underlie  
47 phenotypic plasticity such as signal transduction in plants <sup>12-15</sup>. Auxin promotes plant  
48 growth and development by triggering an intracellular signaling cascade that leads to  
49 changes in gene expression <sup>16</sup>. INDOLE-3-ACETIC ACID proteins (AUX/IAAs) are  
50 mostly short-lived transcriptional repressors, with half-lives varying from ~6-80 min,  
51 and whose expression is largely and very rapidly (less than 15 minutes) stimulated by  
52 auxin <sup>17</sup>. The *Arabidopsis* genome encodes for 29 AUX/IAAs, with 23 of them carrying  
53 a mostly conserved VGWPP-[VI]-[RG]-x(2)-R degron as recognition signal for an  
54 SCF<sup>TIR1/AFB1-5</sup> E3 ubiquitin ligase for auxin-mediated AUX/IAA ubiquitylation and  
55 degradation <sup>18,19</sup>. Under low auxin concentrations, AUX/IAAs repress type A AUXIN  
56 RESPONSE FACTORS (ARF) transcription factors via physical heterotypic  
57 interactions through their type I/II Phox/Bem1p (PB1) domain <sup>19</sup>. Once specific cells  
58 reach an intracellular auxin concentration threshold, F-BOX PROTEINS TRANSPORT  
59 INHIBITOR RESPONSE 1 (TIR1)/AUXIN SIGNALING F-BOX 1-5 (AFB1-5) increase  
60 their affinity for the AUX/IAA degron <sup>20,21</sup>. This results in an AUX/IAA ubiquitylation and  
61 degradation cycle that enables derepression of the transcriptional machinery <sup>22</sup>. Since  
62 AUX/IAAs are themselves auxin regulated, once the intracellular AUX/IAA pool is  
63 replenished, they act again in a negative feedback loop repressing ARF activity <sup>23,24</sup>.  
64 Degron-carrying AUX/IAAs and TIR1/AFB1-5 form an auxin receptor system, as auxin  
65 occupies a binding pocket in TIR1 just underneath the AUX/IAA degron <sup>20</sup>. Auxin

Niemeyer, M., et al

66 binding properties of the receptor complex are greatly determined by the specific  
67 AUX/IAA engaged in the receptor complex <sup>21</sup>. Hence, different combinations of  
68 TIR1/AFBs and AUX/IAAs assemble at different auxin concentrations, allowing the  
69 sensing of fluctuating intracellular auxin concentrations <sup>21</sup>.

70 Although we currently lack structural information on AUX/IAAs, they are postulated to  
71 adopt a modular structure according to sequence homology in different plant species  
72 e.g. 29, 3, 1 members in *Arabidopsis thaliana*, *Physcomitrella patens*, and *Marchantia*  
73 *polymorpha*, respectively <sup>25,26</sup>. Besides the primary degron motif, AUX/IAAs  
74 encompass a TOPLESS interacting motif for transcriptional repression, and the PB1  
75 C-terminal domain (CTD) <sup>27</sup>.

76 While the degron is absolutely necessary for AUX/IAA recruitment and degradation, it  
77 is not sufficient for full auxin binding properties of a TIR1·AUX/IAA auxin receptor pair  
78 <sup>21</sup>. Intriguingly, unresolved flexible regions outside the primary degron contribute to  
79 differential co-receptor assembly <sup>21</sup>, AUX/IAA destabilization <sup>28,29</sup>, basal protein  
80 accumulation <sup>30</sup>, and are also decorated with specific lysine residues that undergo  
81 ubiquitylation *in vitro* <sup>31</sup>.

82 The dynamic range of auxin sensitivity in plant cells, and by default growth and  
83 developmental responses, relies on efficient AUX/IAA processing by the UPS that we  
84 still need to mechanistically understand. The complexity of auxin signaling also  
85 underscores the importance of unveiling precisely how different AUX/IAAs can  
86 contribute to auxin sensing, engage in multifarious interactions, e.g. TIR1·AUX/IAA,  
87 AUX/IAA·AUX/IAA and AUX/IAA·ARF, and undergo ubiquitylation and degradation.  
88 While we recognize the degron as TIR1·AUX/IAA interaction motif, we lack information  
89 on how AUX/IAAs are positioned on TIR1, or whether additional structural AUX/IAA

*Niemeyer, M., et al*

90 features might impact recruitment and auxin binding. Furthermore, full structure of  
91 AUX/IAA proteins has remained elusive so far, as they appear to adopt a highly flexible  
92 fold and/or form high order oligomers due to their PB1 domain.

93 Here, we studied the structural properties of AUX/IAAs and report on intrinsically  
94 disordered regions (IDRs) in IAA7 and IAA12 that influence TIR1·AUX/IAA  
95 interactions. We pursued a biochemical and structural proteomics approach and  
96 unveiled how flexibility in AUX/IAAs affect their conformational ensemble allowing  
97 surface accessibility of degrons. Our data demonstrate how an extended fold in  
98 AUX/IAAs is favorable for recruitment by the SCF<sup>TIR1</sup>, and offers a structural constraint  
99 for correct positioning on TIR1. Our data lays evidence of how AUXIAAs are fully  
100 recognized by the ubiquitylation machinery. We also offer a model of how a potential  
101 allosteric effect that fine-tunes TIR1·AUX/IAA interactions echoes into AUX/IAA-  
102 mediated control of gene expression.

103

104

Niemeyer, M., et al

## 105 Results

### 106 AUX/IAAs exhibit intrinsic structural disorder

107 Regions flanking the core GWPPVR degron motif influence AUX/IAA protein  
108 recruitment by SCF<sup>TIR1</sup>, impact auxin binding, and AUX/IAA degradation. A broader  
109 sequence context of the AUX/IAA degron might be therefore crucial for the adequate  
110 regulation of AUX/IAA processing and turnover, including post-translational  
111 modifications (e.g. ubiquitylation), protein-protein interactions and ligand-protein  
112 interactions <sup>21,28,29</sup>. To probe whether structural flexibility and intrinsic disorder are  
113 common features of AUX/IAAs in general, we carried out an *in silico* analysis  
114 (IUPred2A) of the 29 members of the *Arabidopsis thaliana* AUX/IAA family (**Fig. 1a**,  
115 **Supplementary Figs. 1**). This allows to predict global structural disorder along  
116 AUX/IAA protein sequences, and to score the probability of disorder for every amino  
117 acid residue in a context-dependent manner <sup>32</sup>. We also inspected the distribution of  
118 IDRs in AUX/IAAs outside the well-structured PB1 domain (**Fig. 1a, Supplementary**  
119 **Fig. 1**). We defined scores for disorder probability as high (= disordered, >0.6),  
120 intermediate (0.4-0.6), or low (= ordered, <0.4). First, IDRs occur in most AUX/IAAs  
121 and in almost all AUX/IAA subclades (**Fig. 1a**). IDR-located residues are enriched in  
122 the N-terminal halves of AUX/IAAs and much less so in the C-terminal PB1-domains  
123 (**Fig. 1a, Supplementary Fig. 1**). The length of the AUX/IAAs does not correlate with  
124 an enrichment of disorder segments because IAA1-4 or IAA28 (average length below  
125 200 aa) exhibit features of disorder, while similarly small AUX/IAAs (e.g. IAA6, IAA15,  
126 IAA19, IAA32, or IAA34) are predicted to be well-structured. Interestingly, all non-  
127 canonical AUX/IAAs but IAA33, which lacks the core degron motif for interaction with  
128 TIR1 and auxin binding, are rather ordered. IAA33 diverged early during the evolution  
129 from the rest of the AUX/IAAs <sup>33</sup>, and it belongs, together with canonical IAA26 and



Niemeyer, M., et al

130 IAA13, to the most disordered family members. Intriguingly, AUX/IAAs such as IAA7  
131 and IAA12, which are members of a different subclade <sup>19</sup>, appear to have similar bias  
132 for IDRs (**Fig. 1a, Supplementary Fig. 1**).

133 IAA7 and IAA12 equip TIR1·AUX/IAA receptor complexes with distinct auxin binding  
134 affinities, *i.e.*  $K_d$  TIR1·IAA7 ~10 nM and TIR1·IAA12 ~ 300 nM, respectively <sup>21</sup>. These  
135 differences are not exclusive to a divergent primary degron, since a TIR1-IAA12<sup>GWPPVR</sup>  
136 co-receptor could not account for high auxin binding affinity <sup>21</sup>. This data substantiated  
137 the hypothesis that distinct features outside the core degron, such as IDRs, might  
138 bestow AUX/IAAs, explicitly IAA7 and IAA12, with unique properties for interaction  
139 with TIR1, and therefore auxin sensitivities. In order to investigate the distribution of  
140 disorder in IAA7 and IAA12 proteins, we performed *in silico* analyses using multiple  
141 disorder prediction algorithms (**Fig. 1b**). Consistently, all tested algorithms showed  
142 that most of the disorder segments in IAA7 and IAA12 are located on their N-terminal  
143 half (upstream of the PB1), and near their C-terminus resembling probably a  
144 disordered “piggy tail”. We also observed an enrichment of hydrophilic residues in  
145 these IDRs (hydropathy index), which may therefore be solvent exposed (**Fig. 1b**).  
146 Disorder in IAA7 and IAA12 represents almost 50% of their amino acid content. In  
147 IAA7 but most notably in IAA12, we observed a predominant “order-dip” corresponding  
148 to the core degron (**Fig. 1b**).

149 Using recombinantly expressed proteins, we further analyzed IAA7 and IAA12  
150 secondary structure and overall shape via CD spectroscopy and size exclusion  
151 chromatography, respectively (**Fig. 1c-d, Supplementary Figs. 2-3**). Hereby, we  
152 addressed a function-related transient AUX/IAA fold while considering different protein  
153 conformational classes. In addition to wild-type and oligomerization-deficient IAA7 and  
154 IAA12 full-length proteins (iaa7bm3, iaa12bm3), we incorporated truncated variants of

*Niemeyer, M., et al*

155 IAA7 and IAA12 lacking the compact PB1 domain. Both *iaa7bm3* and *iaa12bm3*  
156 exhibit a rather complex mix of secondary structure elements characteristic of molten  
157 globule-like proteins, displaying a minimum at ~205 nm, and a shoulder near 220 nm  
158 in CD spectra <sup>34</sup>. CD spectra of PB1-lacking IAA7 and IAA12 appear to be shifted  
159 toward a shorter wavelength with a minimum at just below 200 nm, which is  
160 characteristic for random-coil proteins (**Fig. 1c, Supplementary Fig. 2**). **Figure 1d**  
161 shows the measured Stokes radii ( $R_s$ ) for *iaa7bm3*, *iaa12bm3* together with the  
162 theoretical values of IAA7 and IAA12 displaying specific folds, v.z. native fold (NF),  
163 molten globular (MG), premolten globule (PMG), and unfolded (IDP). Since, all  
164 measured Stokes radii are larger than the ones expected for their respective natively  
165 folded proteins, we concluded that *iaa7bm3* and *iaa12bm3* adapt extended structures  
166 mainly due to large proportions of intrinsically disordered segments outside of the  
167 compactly-folded PB1 domain.

168

169 **What is the impact of intrinsic disordered segments on auxin-dependent**  
170 **SCF<sup>TIR1</sup>-AUX/IAA associations?**

171 IAA7 and IAA12 as well as their sister proteins IAA14 and IAA13, respectively, exhibit  
172 striking differences in their degron tail (**Supplementary Fig. 4**). While IAA7 and IAA14  
173 have a short basic degron tail (<30 aa) linking the degron to the PB1 oligomerization  
174 domain, IAA12 and IAA13 have a longer (44 aa), highly charged (Lys, Glu, Asp) and  
175 unstructured degron tail (**Supplementary Fig. 4**). Because IAA7 and IAA12 have  
176 distinct and contrasting TIR1-interaction properties, we reasoned to pinpoint the  
177 determinants of these differences and the impact of IDRs on auxin-dependent  
178 TIR1-AUX/IAA associations by creating IAA7 and IAA12 chimeric proteins. We defined  
179 five different segments flanked by motifs conserved throughout the AUX/IAA family

*Niemeyer, M., et al*

180 **(Fig. 2a, Supplementary Fig. 4)**. We generated 16 seamless chimeric proteins fusing  
181 IAA7 and IAA12 segments taking advantage of the Golden Gate/MoClo system for  
182 scarless multi-part DNA assembly <sup>35</sup> **(Supplementary Fig. 4)**.

183 IAA7 and IAA12 chimeras consist of 5 modules each corresponding to the conserved  
184 domains: DI (N-terminus including KR motif), core degron (VGWPP-[VI]-[RG]-x(2)-R),  
185 the PB1 domain (formerly known as DIII-DIV) **(Supplementary Fig. 4)**, and two  
186 variable IDRs connecting either the DI and degron (linker), or the degron and PB1  
187 domain (degron tail). We exchanged the modules between IAA7 and IAA12 and used  
188 the resulting chimeras for interaction assays with TIR1 in the yeast-two hybrid system  
189 (Y2H) for qualitative assessment of auxin co-receptor assembly **(Fig. 2a,**  
190 **Supplementary Fig. 4)**. TIR1 interacts in an auxin-dependent manner with IAA7  
191 containing all its native segments, denoted IAA(7-7-7-7-7). Expression of the  $\beta$ -  
192 galactosidase reporter indicates stronger interaction of TIR1·IAA7 than TIR1·IAA12.  
193 As expected, mimicking degron mutants *iaa7/axr2-1* (P87S) or *iaa12/bdl* (P74S) in the  
194 IAA7 or IAA12 chimeras (7-7-7m-7-7, 12-12-12m-12-12) abolished their association  
195 with TIR1 **(Fig. 2a)**. Exchanging the disordered degron tail of IAA7 (36 aa) for the one  
196 in IAA12 (49 aa) IAA(7-7-7-12-7) does not affect interaction with TIR1. A IAA(12-12-  
197 12-12-7-12) chimera however, associated with TIR1 much more efficiently, and in an  
198 auxin-dependent manner than wild type IAA(12-12-12-12-12). Similarly, PB1 domain  
199 exchanges between IAA7 or IAA12 affected positively the ability of the IAA(12-12-12-  
200 12-7) chimera to interact with TIR1. To investigate interdependency of the degron tail  
201 and the PB1 domain, we exchanged the flexible degron tail of IAA12 together with its  
202 corresponding PB1 domain, and fused them to IAA7 IAA(7-7-7-12-12). In this case,  
203 TIR1·IAA(7-7-7-12-12) interaction is greatly affected, while TIR1·IAA(12-12-12-7-7)  
204 interaction, although weak, remains stronger than TIR1·IAA(12-12-12-12-12)

Niemeyer, M., et al

205 association. Next, we omitted the degron tails in either the wild type proteins or in the  
206 PB1-swapped versions. In both instances, when IAA7 lacks its native degron tail  
207 irrespective of the PB1 it carries, (7-7-7- $\Delta$ -7 or 7-7-7- $\Delta$ -12) basal interactions with TIR1  
208 do not occur and auxin-dependent interactions are greatly diminished. On the other  
209 hand, IAA(12-12-12- $\Delta$ -12) and IAA(12-12-12- $\Delta$ -7) chimeras invariably exhibit an  
210 increased ability to interact with TIR1, independently of their expression level  
211 (**Supplementary Fig. 4**). Surprisingly, in each case when we omitted the PB1 domain  
212 of IAA7 chimeras, we observed strong interactions with TIR1. This coincidentally  
213 supports previous observations where removal of the folded PB1 domain in several  
214 AUX/IAAs resulted in accelerated auxin-induced turnover<sup>29</sup>. It has been postulated  
215 this effect is due to high order complexes the PB1 domains engage in, which might  
216 negatively influence AUX/IAA processing in yeast<sup>29</sup>. Hence, when the PB1 domain is  
217 omitted, chimeric proteins seem to be unhindered by oligomeric interactions and  
218 readily interact with TIR1 in yeast. Of note, independently of the layout of the core  
219 degron, either GWPPVR in IAA7 or GWPPIG in IAA12, the IAA7 degron tail and PB1  
220 combo of IAA7 favor auxin-dependent TIR1·AUX/IAA chimera interactions  
221 (**Supplementary Fig. 5**). Taking together, auxin-dependent and –independent  
222 interactions are influenced by both the degron tail and the PB1 domain, as they  
223 probably act in concert.

224 In order to address whether accessibility of IDRs and the PB1 domain in AUX/IAAs  
225 affect the outcome of TIR1·AUX/IAA interactions, we carried out *in vitro* radioligand  
226 binding assays. We used recombinant TIR1 as well as IAA7 and IAA12 chimeric or  
227 *iaa7bm3* and *iaa12bm3* mutant proteins. While auxin binding affinities of  
228 TIR1·*iaa7bm3* and TIR1·IAA(7-7-7-7-12) complexes are reduced when compared to  
229 the TIR1·IAA7 co-receptor system (TIR1·*iaa7bm3* =  $K_d$  ~53 and TIR1·*iaa7bm3*  $K_d$  45

Niemeyer, M., et al

230 nM vs. TIR1-IAA7  $K_d$  ~23 nM), we observed similar auxin affinities of TIR1-iaa12bm3  
231 and TIR1-IAA12 co-receptors ( $K_d$  ~195 nM vs. 226 nM, respectively) (**Fig. 2b-d,**  
232 **Supplementary Fig. 6**). This indicates that homotypic interactions in the case of  
233 IAA12 might not interfere with the auxin binding properties of an IAA12-containing  
234 auxin co-receptor. The decrease in the auxin binding affinity of TIR1-iaa7bm3 and  
235 TIR1-IAA(7-7-7-7-12) co-receptors hints to a positive effect of the IAA7 PB1 domain  
236 on auxin sensing (**Fig. 2b and d**). Exchange of disordered degron tails in chimeric  
237 IAA7 and IAA12 altered the affinity for auxin. The degron tail of IAA12 in the IAA7  
238 context, IAA(7-7-7-12-7), reduces by two-fold auxin binding affinity of the receptor  
239 (**Fig. 2b-d**). Conversely, the disordered degron tail of IAA7 in an IAA12 context,  
240 IAA(12-12-12-7-12), appears to enhance AUX/IAA contribution to an auxin receptor.  
241 This is consistent with our Y2H data, where we observed a unique positive effect of  
242 the IAA7 PB1 domain. Taken together, our data confirm the postulated  
243 interdependency of the degron tail and PB1 domain, and further point to additive and  
244 separate effects of each disordered degron tail and the PB1 domain on auxin-  
245 independent and auxin-triggered TIR1 interaction.

246

### 247 **IDRs in AUX/IAAs harbor ubiquitylation sites or facilitate their accessibility**

248 To investigate differences in ubiquitylation dynamics, and reveal whether the  
249 disordered nature of IAA7 and IAA12 influences ubiquitylation rate, we recapitulated  
250 auxin-triggered IAA7 and IAA12 ubiquitylation. We used E1 (AtUBA1), E2 (AtUBC8),  
251 E3 (SCF<sup>TIR1</sup>) and auxin (IAA), as previously described<sup>31</sup>. We traced IAA7 and IAA12  
252 ubiquitylation over time at different auxin concentrations (**Fig. 3, Supplementary Fig.**  
253 **7**). We covered IAA concentrations between the auxin binding affinity ( $K_d$ ) of  
254 TIR1-IAA7 and TIR1-IAA12 co-receptor complexes (*i.e.* 25 nM to 155 nM) (**Fig. 2d**)

Niemeyer, M., et al

255 and at higher, saturating conditions. We observed robust SCF<sup>TIR1</sup>-mediated IAA7  
256 ubiquitylation even in the absence of auxin, which can be explained by previously  
257 reported basal TIR1-IAA7 interactions. IAA12-ubiquitin conjugates were much less  
258 abundant than IAA7 after 30 min incubation (**Fig. 3a**). For IAA7 and IAA12, we  
259 observed differential and auxin-enhanced ubiquitylation on-target that increases over  
260 time. Ubiquitin-conjugates on IAA7 and IAA12 are already traceable 10 min after  
261 incubation, and their ubiquitylation is accelerated in an auxin-dependent manner.  
262 Once an auxin concentration above the  $K_d$  for the TIR1-IAA12 ( $\pm 150$  nM) co-receptor  
263 complex is reached, the differences in ubiquitin conjugation on IAA7 and IAA12 are  
264 negligible over time. Reaching an auxin concentration of 1  $\mu$ M corresponding to at  
265 least 50-times the  $K_d$  of TIR1-IAA7, and 4-5-times the  $K_d$  of TIR1-IAA12 for IAA (**Fig.**  
266 **2d**), AUX/IAA ubiquitylation becomes solely time-dependent. We conclude IAA7 and  
267 IAA12 ubiquitylation occurs in less than 30 min, and the differences in ubiquitylation  
268 dynamics depend on the auxin binding affinity by their corresponding receptors when  
269 in complex with TIR1. Given auxin to be a “molecular glue” between TIR1-AUX/IAs,  
270 we postulate auxin might be needed for increasing the dwell-time of flexible AUX/IAs  
271 on TIR1. This facilitates sampling of favorable AUX/IAA conformations allowing  
272 efficient ubiquitin transfer to lysine residues.

273 Putative ubiquitin acceptor lysine residues along the IAA7 and IAA12 sequences are  
274 enriched in the degron tail of IAA12, and the linker of IAA7, both of which appear to  
275 lack a three dimensional (3D) structure (**Fig. 3b**). We aimed therefore at gaining  
276 experimental evidence of ubiquitylation sites in IAA7 and IAA12. After *in vitro*  
277 ubiquitylation (IVU) reactions, tryptic digest and LC/MS analysis, we were able to map  
278 only few specific lysine residues on IAA7 and IAA12, which are differently distributed  
279 along their sequence (**Fig. 3b, Supplementary Table 1**). Although IAA7 and IAA12

*Niemeyer, M., et al*

280 contain 24 and 18 lysine residues, respectively, only 3 and 6 of them were  
281 ubiquitylated. While we observed only few ubiquitylated lysine residues at the AUX/IAA  
282 N-terminus, most of the mapped ubiquitylation sites were located in the region  
283 downstream of the degron, either in the PB1 domain in IAA7, or the degron tail in  
284 IAA12. Even though 4 lysines are conserved in the PB1 domain of IAA7 and IAA12,  
285 only the non-conserved residues appeared to be ubiquitylated in IAA7. The flexible  
286 degron tail of IAA7 did not get ubiquitylated, whereas 4 out of 7 lysine residues in the  
287 slightly longer disordered IAA12 degron tail could be mapped as ubiquitylation sites  
288 **(Fig. 3b, Supplementary Table 1)**.

289 To further investigate whether the apparent structural divergence of IAA7 and IAA12  
290 imposes restrictions to lysine access for ubiquitylation, we used chimeric IAA7 and  
291 IAA12 proteins **(Fig. 3c)** in our IVU assay. As we aimed at visualizing absolute  
292 differences in ubiquitin conjugation, we traced auxin-dependent ubiquitin conjugation  
293 of chimeric AUX/IAAs at a fixed IAA concentration of 0.5  $\mu$ M after 1 hour IVU reaction.  
294 Exchanging the degron tails or the PB1 domains between IAA7 and IAA12 led to  
295 differences in ubiquitylation profiles of chimeric proteins compared to their wild type  
296 counterparts. This happens as we either added or subtracted regions that contain the  
297 ubiquitin acceptor sites in the IAA7 and IAA12 chimeric proteins **(Fig. 3c,**  
298 **Supplementary Fig. 8)**. For instance, we detected an increase of ubiquitin conjugates  
299 on IAA(7-7-7-12-7), which gains ubiquitylation sites due to the exchange of the IAA7  
300 degron tail. Deleting the AUX/IAA degron tail or the PB1 domain in the chimeric  
301 proteins results in an overall reduction of ubiquitin conjugates on targets. Versions of  
302 IAA7 or IAA12 missing a degron tail and containing the PB1 domain of IAA12, IAA(7-  
303 7-7- $\Delta$ -12) and IAA(12-12-12- $\Delta$ -12), do not undergo auxin-triggered ubiquitylation **(Fig.**  
304 **3c, Supplementary Fig. 8)**. Similarly, AUX/IAA versions containing the IAA7 degron



Niemeyer, M., et al

305 but lack a PB1 domain (IAA(7-7-7-7- $\Delta$ ), IAA(12-12-12-7- $\Delta$ )) are not conjugated by  
306 ubiquitin, probably due to the loss of the mapped ubiquitin acceptor sites (**Fig. 3b**).  
307 Our IVU assays on AUX/IAA chimeras validate our findings showing that the IAA7 PB1  
308 domain or the flexible IAA12 degron tail carry propitious ubiquitylation sites. Thus, we  
309 postulate AUX/IAA ubiquitylation favorably occurs in exposed regions in IAA7 and  
310 IAA12, when they are recruited by TIR1.

311

312 **TIR1·AUX/IAA ensembles are guided by the degron, but tailored by flexible**  
313 **degron flanking regions**

314 Due to the relative lack of a stable 3D conformation, IDPs or proteins enriched in IDRs,  
315 such as AUX/IAAs, represent a challenge for structural biology studies. During  
316 interactions with target proteins, IDPs, particularly IDRs, may undergo conformational  
317 changes that cannot be traced easily, or captured while happening<sup>36,37</sup>. Although the  
318 *Arabidopsis* SKP1 (ASK1)·TIR1·auxin·degron crystal structure enlightened us on how  
319 auxin is perceived, we lack information on the contribution of regions flanking the  
320 AUX/IAA degron on auxin binding. Thus, without being able to structurally resolve  
321 intrinsically disordered degron flanking regions, we are hindered in our understanding  
322 of how AUX/IAA ubiquitylation targets are actually positioned on TIR1. This has  
323 evidently far-reaching implications on SCF<sup>TIR1</sup> E3 ubiquitin ligase activity and ubiquitin  
324 transfer by an E2 ubiquitin conjugating enzyme.

325 We aimed to elucidate the driving factors for ASK1·TIR1·AUX/IAA complex assembly  
326 and to unveil how IDRs in AUX/IAAs influence positioning on TIR1. We pursued a  
327 structural proteomics approach using chemical cross-linking coupled to mass  
328 spectrometric analyses (XL-MS) (**Fig. 4a**). We assembled ASK1·TIR1·AUX/IAA



*Niemeyer, M., et al*

329 complexes containing either IAA7bm3 or IAA12bm3 proteins in the absence or  
330 presence of auxin (IAA), and added the MS-cleavable cross-linker disuccinimidyl  
331 dibutyric urea (DSBU). Reaction products were processed for mass spectrometric  
332 analysis, which utilizes the characteristic fragmentation of DSBU to identify cross-  
333 linked residues within the AUX/IAAs and the ASK1·TIR1·AUX/IAA complex<sup>38-40</sup>. Our  
334 data shows multiple intra- and inter-molecular cross-links for ASK1·TIR1 and IAA7bm3  
335 or IAA12bm3 proteins in the presence of auxin (**Fig. 4b-d, Supplementary Fig. 9-10**).  
336 In the absence of auxin, we observed only a few inter-protein and similar intra-protein  
337 cross-links when compared to auxin-containing samples (**Fig. 4, Supplementary Fig.**  
338 **10**). In the presence of auxin, we identified two distinct clusters in TIR1 harboring  
339 cross-linker-reactive amino acid side chains with IAA7 and IAA12 (**Fig. 4b,**  
340 **Supplementary Fig. 9**). Cluster 1 comprises amino acid residues in LRR7 (217-229  
341 aa), while cluster 2 consists of residues toward the TIR1 C-terminus located in LRR17-  
342 18 (485-529 aa). The location of the clusters on two opposing surfaces of TIR1  
343 suggests a rather extended fold of the AUX/IAA protein when bound to TIR1 (**Fig. 4b**).  
344 The cross-linked residues along the sequences of ASK1·TIR1·IAA7bm3 or  
345 ASK1·TIR1·IAA12bm3 show an enrichment of highly variable intra-molecular cross-  
346 links within the AUX/IAAs (**Fig. 4c-d**). A low number of intra-protein cross-links along  
347 the TIR1 sequence were detected as a consequence of its rigid solenoid fold, which  
348 is in agreement with the ASK1·TIR1 crystal structure (PDB: 2P1Q,<sup>20</sup>). Inter-protein  
349 cross-links indicate that the cross-linker-reactive clusters in TIR1 mainly connect with  
350 only a specific subset of AUX/IAA residues (**Fig. 4b**). Multiple IAA7 residues upstream  
351 of the core degron, including the KR motif, preferably cross-linked to TIR1 cluster 2.  
352 While residues downstream of the core degron, including the PB1 domain, positioned  
353 towards TIR1 cluster 1 (**Fig. 4c**). IAA12 is similarly positioned on TIR1, but exhibits

Niemeyer, M., et al

354 even higher flexibility given the more diverse distribution of inter-protein cross-links  
355 (**Fig. 4d**). This is also supported by the fact that we detected many more assemblies  
356 for ASK1·TIR1·IAA12 bm3 across replicates, than for the ASK1·TIR1·IAA7bm3  
357 complex (**Fig. 4c-d**). In conclusion, our structural proteomics approach confirmed  
358 AUX/IAAs IAA7 and IAA12 exhibit flexible conformations in solution (intra-protein  
359 cross-links), and adopt an extended fold when bound to TIR1.

360 As we gained a better understanding on the extended fold of IAA7 and IAA12 on TIR1,  
361 we wondered whether intrinsic disordered stretches flanking the degron might help to  
362 coordinate positioning of the folded PB1 domain. An extended AUX/IAA configuration  
363 on TIR1 would be particularly relevant for allowing K146 and K223 in the PB1 domain  
364 of IAA7 to be readily available for ubiquitylation. In the case of IAA12, an assertive  
365 extension of the degron tail would expose K91, K111, K116 and K120 for ubiquitin  
366 attachment (**Fig. 3b**).

367

### 368 **Conformational heterogeneity in flexible IDR steers AUX/IAA molecular** 369 **interactions**

370 To further investigate how the intrinsic disorder in IAA7 and IAA12 influence their  
371 positioning on ASK1·TIR1, we combined our cross-linking information with a molecular  
372 docking strategy (**Fig. 5, Supplementary Fig. 11**). For that, we use available  
373 structures for the PB1 domains of AUX/IAAs and ARFs<sup>41-44</sup>. We docked homology-  
374 modeled PB1 domains of *Arabidopsis* IAA7 and IAA12 to the ASK1·TIR1 complex,  
375 applying distance restraints based on the cross-linking data (**Fig. 5, Supplementary**  
376 **Fig. 11**). We also added an additional distance restraint reflecting the possible  
377 conformational space covered by the respective degron tails. We visualized the impact

*Niemeyer, M., et al*

378 of the different restraints on the possible interaction interface of ASK1·TIR1·IAA7 PB1  
379 and ASK1·TIR1·IAA12 PB1 by DisVis<sup>45</sup> (**Fig. 5c-d**). Evidently, by incorporating more  
380 distance restraints, we limit the number of ASK1·TIR1·AUX/IAA<sup>PB1</sup> protein complexes,  
381 therefore reducing their explored interaction space (**Fig. 5**).

382 Intriguingly, the relationship between the number of accessible complexes vs. the  
383 number of restraints applied does not reveal a linear behavior, but shows a sharp drop  
384 when the degron tail restraint is added to all cross-link-based restraints (**Fig. 5a-b**).  
385 Comparing the groups of water-refined HADDOCK models lead to similar observations  
386 and the best scoring groups were only sampled incorporating the degron tail restraint  
387 (**Supplementary Table 2**). This indicates the disordered degron tail restricts the  
388 conformational space explored by the PB1 domain (**Supplementary Table 2**,  
389 **Supplementary Fig. 11-12**). The reduction of accessible ASK1·TIR1·IAA7 PB1 and  
390 ASK1·TIR1·IAA12 PB1 complexes for docking is also reflected by the decreased  
391 space that can be possibly occupied by the PB1 domain (**Fig. 5c-d**). Overall, cross-  
392 linking-based docking of the PB1 domain of IAA12 on the ASK1·TIR1 complex is less-  
393 defined, and occupies a distinct conformational space than the ASK1·TIR1·IAA7 PB1  
394 complex.

395 In order to refine our docking data and identify the most energetically-favored  
396 TIR1·AUX/IAA PB1 assemblies, we carried out molecular dynamic simulations  
397 coupled to free-binding energy calculations by MM/GBSA. We used as a starting  
398 structure (t=0) the results from the HADDOCK simulations including the degron tail  
399 restraint, and performed 20 ns simulations for each TIR1·IAA7 PB1 or TIR1·IAA12  
400 PB1 complex (**Fig. 6 a-b**). We obtained the effective binding free energy every 1 ps  
401 for each simulation, and observed distinct average effective energy ( $\Delta G_{\text{eff}}$ ) for the  
402 different groups in each system (protein complex). Group 1 for TIR1·IAA7 PB1 and

Niemeyer, M., et al

403 groups 1 and 3 for TIR1-IAA12 PB1 turned out to be energetically less stable, while  
404 groups 2 in each case showed the lowest binding energy. This indicates groups 2 likely  
405 depict the most probable ensembles (**Fig. 6 a-b**). To identify relevant residues in  
406 groups 2 favoring TIR1-AUX/AA interactions, we carried out per-residue effective  
407 energy decomposition analysis (prEFED) followed by validation via computational  
408 alanine scanning (CAS) (**Fig. 6c, Supplementary Table 3**). We found residues in  
409 TIR1 that might engage in polar interactions with the AUX/IAA PB1 domain. D119,  
410 D170, V171, S172, H174, H178, S199, R220 along the LRR3-6 in TIR1 likely  
411 contribute to stabilization of the TIR1-IAA7 PB1 complex. Residues H174, H178, S199  
412 also stabilized TIR1-IAA12 PB1 interactions together with R156, S177, S201, and  
413 R205 in TIR1 LRR4-6 (**Fig. 6c-d, Supplementary Fig. 13**).

414 Next, we assessed empirically whether the *in silico* identified TIR1 residues contribute  
415 to TIR1-AUX/IAA interaction. We generated mutant TIR1 proteins and evaluated their  
416 interaction with either ASK1 or IAA7 and IAA12 in Y2H assays (**Fig. 6e**). We aimed at  
417 identifying residues in cluster 1 at the TIR1 NTD and cluster 2 in TIR1 CTD (**Fig. 4b**),  
418 which might provide non-native interaction interfaces with either the PB1 domain or  
419 the KR motif of AUX/IAA proteins, respectively (**Fig. 6c-e, Supplementary Table 3**).  
420 Mutations R156E, as well as S201A, and S205A either abolished or drastically  
421 impaired basal TIR1-IAA7 and auxin-driven TIR1-IAA7 and TIR1-IAA12 associations,  
422 without affecting ASK1-TIR1 ensembles. This allowed us to postulate that the  
423 positioning of the PB1 domain of AUX/IAs on a specific NTD region in TIR1 might  
424 have a favorable effect as part of the target recruitment mechanism. Specifically, IAA7  
425 and IAA12 PB1 “piggy tails” might be in contact with R156 in TIR1. On the other hand,  
426 mutations S172A, H174A, E197A, S199A, and R220A impaired ASK1-TIR1 and  
427 TIR1-IAA7, as well as TIR1-IAA12 interactions. This data suggests these mutations

*Niemeyer, M., et al*

428 causing a long range effect on TIR1 activity and probably its overall conformational  
429 stability, that is however independent on TIR1 expression levels (**Fig. 6f**). While D170  
430 offered one of the best CAS scores (**Supplementary Table 3**), D170K mutation  
431 probably corresponds to a null allele, as it leads to a reduction of protein levels, and a  
432 complete disruption of TIR1 associations (**Fig. 6c, e-f**).

433 Among the mutants tested, we also included a reversed charge exchange for D481,  
434 which is located in a negative charged patch in cluster 2 of TIR1 (**Fig. 4b**). According  
435 to our cross-linking data, D481, S482, E459 or E506 might decorate this exposed  
436 charged patch and exert electrostatic interactions with a conserved Lys-Arg (KR)  
437 dipeptide located between the AUX/IAA N-terminus and the degron (**Supplementary**  
438 **Fig. 9**). The KR was previously postulated to act as auxin-responsive rate motif  
439 influencing AUX/IAA turnover, and the magnitude of this effect was correlated with the  
440 proximity of the KR to the degron <sup>28,29</sup>. Interestingly, we found evidence for the KR  
441 motif in AUX/IAAs to favor basal interactions with the CTD of TIR1, as D481R  
442 abolished TIR1·IAA7 interaction in the absence of auxin, while weakening auxin-driven  
443 TIR1·IAA7 and TIR1·IAA12 interactions (**Fig. 6e**).

444 Our interaction studies combined with a structural proteomics approach demonstrated  
445 IDRs in IAA7 and IAA12 harbor specific features that support TIR1·AUX/IAA  
446 interactions. Charged residues surrounding the KR motif, the core degron, the degron  
447 tail and the PB1 domain act in concert to secure AUX/IAA on TIR1, thereby modulating  
448 auxin binding dynamics and likely enabling efficient ubiquitin transfer.

Niemeyer, M., et al

## 449 Discussion

450 Auxin is perceived by the FBP TIR1 and its ubiquitylation targets the AUX/IAA  
451 transcriptional repressors. While TIR1 adopts a compact solenoid fold, AUX/IAAs  
452 appear flexible and modular in nature as they engage in various protein interaction  
453 networks<sup>23,46</sup>. A 13-aa degron motif in AUX/IAAs seals a ligand binding groove in  
454 TIR1, securing auxin in place. To date, we lacked information on whether additional  
455 physical interactions between TIR1-AUX/IAAs influence conformation and fate. We  
456 also did not know whether additional partner interactions facilitate the formation of the  
457 final auxin receptor complex by a two-dimensional search on the part of TIR1 on the  
458 AUX/IAA surface or *vice versa*. We found IAA7 and IAA12 exhibit conformational  
459 flexibility due to the presence of IDRs along their sequence. From the TIR1-auxin-IAA7  
460 degron structure, we observed the degron adopts a slight helical structure<sup>20</sup>. Our data  
461 shows this semihelical peptide is embedded in an intrinsically disordered stretch,  
462 which represent ~50% of the AUX/IAA sequence, and winds down in the well-folded  
463 PB1 domain.

464 We showed IAA7 and IAA12 have properties of a molten globule, or a loosely packed  
465 and highly dynamic conformational fold. Although IAA7 and IAA12 might exhibit  
466 conformational heterogeneity, we observed that, while in solution, they maintain  
467 unprecedented flexibility that seems to favor recruitment by the SCF<sup>TIR1</sup>.  
468 Computational and experimental studies have shown IDRs such as those in  
469 AUX/IAAs, act as inter-domain linkers contributing to protein-protein interactions by  
470 exclusively or partially forming binding interfaces<sup>15,47,48</sup>. Indeed ensembles of IAA7  
471 and IAA12 with TIR1 captured by XL-MS allowed us to visualize AUX/IAAs “kissing  
472 and embracing” TIR1 (**Fig. 7**). While the degron drives auxin-mediated interactions,  
473 the IDR upstream of the degron and the PB1 domain engage in transient interactions

Niemeyer, M., et al

474 with the CTD, and the NTD of TIR1, respectively. A directional embrace of TIR1 by an  
475 open-armed AUX/IAA, strengthened by degron-flanking IDRs, is initiated by a  
476 TIR1-auxin-degron kiss. This is remarkable indeed, as we show for the first time that  
477 the PB1 domain may contact the TIR1 surface.

478 Signaling proteins carrying IDRs with mostly polar and charged residues seem to have  
479 evolved more rapidly than ordered sequences, allowing increased functional  
480 complexity<sup>49,50</sup>. In our study, this applied to IDRs in regions upstream of the degron,  
481 but not for AUX/IAAs degron tails. Although IAA7 and IAA12 show differences on IDR  
482 content and length, both embraced TIR1 in a similar manner. Despite the fact that the  
483 degron tail in IAA12 is third longest in the AUX/IAA family (49 aa) and about ~1.3 times  
484 longer than the tail of IAA7 (36 aa), both offer flexibility (**Supplementary Fig. 14**). An  
485 introduced degron length constraint in IAA7 and IAA12 greatly reduced the sampled  
486 conformational space of IAA7 and IAA12 on TIR1. Finally, degron tails seem to  
487 increase the interaction surface with TIR1, which we anticipate translates into  
488 variability of binding kinetics.

489 Within the *Arabidopsis* AUX/IAA protein family, nearly half of the degron tails are  
490 between 20-40 aa long and show high disorder probability (**Supplementary Fig. 1**).  
491 Seven of the 23 degron-containing AUX/IAAs (IAA19, IAA4, IAA6, IAA5, IAA1, IAA2,  
492 IAA15), however, carry a relatively ordered degron tail shorter than 20 amino acids  
493 (**Supplementary Fig. 14**). Is that specific length an evolutionary constraint for TIR1  
494 association? Auxin-dependent gene regulation, and AUX/IAA proteins appear in the  
495 land plant lineage over 500 mya<sup>33,51</sup>. When comparing the proteins sequence of the  
496 two ancestral AUX/IAAs in moss and *Marchantia*<sup>25,26</sup>, we observed their degron tails  
497 are not much longer than the average degron tails (40 aa) of *Arabidopsis* AUX/IAAs,  
498 despite the overall length of these proteins being at least double that of angiosperm



Niemeyer, M., et al

499 AUX/IAAs. It will be interesting to investigate whether degron tails length and disorder  
500 content are a deeply conserved features for surface availability, and whether short  
501 degron tails (less than 20 aa) can still offer tailored positioning on TIR1. Furthermore,  
502 the degron tail might generate an entropic force <sup>52,53</sup> that is fine-tuned, but also  
503 restricted by IDR length, modulating binding of AUX/IAAs to TIR1.

504 Particular stretches of amino acids with increased evolutionary conservation within  
505 disordered segments have been found to determine interaction specificity, acting as  
506 functional sites <sup>49,50,54</sup>. This seems to precisely apply to the region in AUX/IAAs  
507 upstream of the degron containing the auxin-responsive rate KR motif <sup>28,55</sup>. The KR  
508 exhibits a high level of conservation, and in addition to being part of a bipartite nuclear  
509 localization signal (NLS), the KR contributes to assembly of a TIR1·AUX/IAA auxin  
510 receptor complex and, probably as a result, is required for basal proteolysis *in planta*  
511 and AUX/IAA degradation dynamics <sup>21,28,29,55</sup>. How mechanistically could the KR exert  
512 an effect on TIR1 recognition and further AUX/IAA processing? Our findings lead us  
513 to propose an answer to a more than 10 year's long standing question. As part of the  
514 AUX/IAA embrace of TIR1, the KR motif embedded in the IDR upstream of the degron  
515 offers alternative contacts with the CTD of TIR1 and probably first binding contacts  
516 (**Fig. 7**). Previous studies showed that moving the KR motif closer to the degron was  
517 not sufficient to accelerate AUX/IAA degradation rate <sup>29</sup>. We predict a high flexibility of  
518 the IDR offers a necessary distance between the KR and the core degron for reaching  
519 distinct TIR1 contact sites. So, the positively charged KR motif in AUX/IAAs may be  
520 capable of engaging in electrostatic interactions with a cluster of highly charged (Asp,  
521 Glu) residues in TIR1 between LRR16 and LRR18, where D481 is located. While TIR1  
522 and AFB1 offer similar contact points to the KR in AUX/IAAs, AFB2 and AFB3 exhibit  
523 opposite charged residues (Lys) that however might still provide charge-charge



*Niemeyer, M., et al*

524 interactions with a specific subset of AUX/IAAs. It remains to be determined whether  
525 this is an additional feature facilitating differential auxin sensing by distinct  
526 TIR1/AFBs-AUX/IAA co-receptor combinations <sup>21</sup>.

527 Local flexibility in AUX/IAAs is evidently shaping their conformation when in complex  
528 with TIR1. Specifically, flexible IDRs flanking the core degron in AUX/IAAs, as shown  
529 for IAA7 and IAA12, serve as variable spacers between the degron and the well-folded  
530 PB1 domain. Our data provide direct evidence also for dynamic allosteric modulation  
531 of a TIR1-AUX/IAA auxin receptor complex by the folded-PB1 domain and IDRs in  
532 AUX/IAAs. We could track positive but also negative cooperativity, due to the degron  
533 tail and PB1 domain combo, fine-tuning conformational states of TIR1-IAA7 and  
534 TIR1-IAA12 receptor pairs, respectively. Further long-range, probable allosteric,  
535 effects are reflected into AUX/IAA turnover, when PB1 domain and degron tail act as  
536 one element (**Supplementary Fig. 5**).

537

538 Structural disorder in AUX/IAA targets appears also to be instrumental for processivity  
539 in ubiquitin transfer by the SCF<sup>TIR1</sup> E3 ubiquitin ligase. This is crucial as once an active  
540 E2-E3-target assembly has formed, spatial and geometric constraints such as  
541 distance and orientation relative to the E3-bound primary degron limit ubiquitylation  
542 surface and lysine selection for degradation <sup>7</sup>. AUX/IAA sequence harbors a number  
543 of putative ubiquitin acceptor lysines (~9% total sequence) (**Supplementary Fig. 14**).  
544 Our data show that not all of these sites are favorable for ubiquitylation. Downstream  
545 of the core degron, AUX/IAAs likely offer an attractive region for ubiquitin conjugation.  
546 We predict either the PB1 or the degron tail facilitate the accessibility of receptor  
547 lysines that undergo ubiquitylation. Upon TIR1-AUX/IAA interaction, IDRs either act  
548 themselves as ubiquitylation acceptor sites (e.g. IAA12) or orient the PB1 domain-

*Niemeyer, M., et al*

549 located lysines as ubiquitin acceptor sites (e.g. IAA7). We cannot rule out however,  
550 regulated and efficient ubiquitin transfer might prioritize target degradation at the  
551 proteasome. This is key, as AUX/IAA turnover likely needs properly positioned  
552 ubiquitin moieties at the proper distance of an IDR, and an IDR with unbiased  
553 sequence composition as an initiation site for efficient degradation <sup>56-58</sup>. To better  
554 understand this, it will be imperative to gain insights into where AUX/IAAs are  
555 ubiquitylated *in vivo*, and where exactly the proteasome initiates degradation relative  
556 to the ubiquitylation sites.

557 The effects of cooperative allostery driven by IDRs in AUX/IAA proteins might not be  
558 limited to the TIR1-AUX/IAA interaction, but rather influence the assembly into other  
559 complexes regulating auxin output signals <sup>59</sup>. It is therefore also possible that in  
560 response to fluctuating cellular auxin concentrations, transient TIR1-AUX/IAA  
561 interactions via IDRs alter the energy landscape of AUX/IAA-TPL, AUX/IAA-ARF and  
562 AUX/IAA-AUX/IAA assemblies and/or possible decorations with PTMs. Future studies  
563 will also tell whether IDRs in AUX/IAAs, and the recently described IDRs in ARFs,  
564 affect their protein assembly's localization or activity <sup>60</sup>. One can envision, IDR-driven  
565 cooperativity resulting in a multiplicity of allosterically-regulated interactions within the  
566 auxin signaling pathway, where AUX/IAAs act as signaling hubs within the different  
567 complexes.

568 Using an XL-MS approach, we have captured for the first time a highly flexible  
569 ubiquitylation target being engaged by an SCF-type E3 ubiquitin ligase, which at the  
570 same time, constitutes a phytohormone receptor. Our strategy offers an opportunity to  
571 visualize how IDR-driven allostery might influence a complex signaling network.

Niemeyer, M., et al

## 572 **Methods**

### 573 **Phylogenetic tree generation and secondary structure analysis**

574 Phylogenetic tree construction was done using Clustal Omega<sup>61</sup> with standard settings  
575 and the full-length protein sequences of all *Arabidopsis* AUX/IAAs deposited at  
576 uniprot<sup>62</sup>. The constructed tree was visualized by iTOL<sup>63</sup> and manually edited. *In silico*  
577 disorder analysis was performed with the web-based IUPred2A tool<sup>32</sup> utilizing  
578 AUX/IAA protein sequences. The resulting disorder probability was used to categorize  
579 each residue as either ordered (<0.4), intermediate (0.4-0.6) or disordered (>0.6).  
580 Same analysis was done for all AUX/IAA proteins excluding the PB1 domain using the  
581 conserved VKV motif as the start of the PB1 domain. Residues of each category were  
582 plotted using R. IAA7 and IAA12 disorder predictions were additionally carried out  
583 using SPOT<sup>64</sup> and PrDOS<sup>65</sup> algorithms with standard settings. Hydropathy plots were  
584 generated via ExPASy-linked ProtScale<sup>66,67</sup> using the Kyte-Doolittle method<sup>68</sup>.

585

### 586 **Protein purification**

587 ASK1-TIR1 complex was purified from Sf9 cells as described earlier<sup>20</sup> with minor  
588 changes. In brief, ASK1 was co-purified with GST-TIR1 using GSH affinity  
589 chromatography (gravity flow) and anion chromatography (MonoQ) followed by Tag-  
590 removal and a final size-exclusion chromatography (SEC) step (Superdex 200), using  
591 an ÄKTA FPLC system.

592 AUX/IAA proteins, including chimeric versions, were expressed as GST-tagged  
593 proteins in *E.coli* and purified using GSH affinity chromatography, including a high salt  
594 wash (1M NaCl) and gravity flow anion exchange chromatography (Sephacrose Q). For  
595 circular dichroism, the GST-tag was removed on the GSH column matrix with  
596 thrombin, and fractions containing AUX/IAAs were briefly concentrated, passed over

*Niemeyer, M., et al*

597 a benzamidine column, and further purified using a Sephacryl S100 column (SEC)  
598 with an ÄKTA FPLC system. This step was carried out using the CD measurement  
599 buffer (see CD measurement section) for buffer exchange.

600

### 601 **Size exclusion chromatography and size calculations**

602 The last protein purification step was used to simultaneously determine the Stokes  
603 radii of AUX/IAAs in CD buffer (10 mM KPi pH 7.8; 150 mM KF; 0.2 mM TCEP). The  
604 HiPrep 16/60 Sephacryl S-100 high resolution column was calibrated using gel  
605 filtration standards (Bio-Rad, Cat. #151-1901) with added BSA before the runs. Stokes  
606 radii for the globular known reference proteins were calculated as described<sup>69</sup>. The  
607 Stokes radii of AUX/IAA variants were calculated from the resulting calibration curve  
608 equation based on their retention volume (n = 4-9).

609

### 610 **Circular Dichroism (CD) measurements**

611 After purification, including tag-removal and size exclusion chromatography,  
612 AUX/IAAs were concentrated and adjusted to 2.5 - 5  $\mu$ M in CD buffer. CD  
613 measurements were carried out on a Jasco CD J-815 spectrometer and spectra were  
614 recorded from 260 nm to 185 nm as 32 accumulations using a 0.1 nm interval and 100  
615 nm/min scanning speed. Cell length was 1 mm and temperature was set to 25°C. All  
616 spectra were buffer corrected using CD buffer as a control and converted to mean  
617 residual ellipticity (MRE). Reference spectra for a disordered (MG-14; PCDDDBID:  
618 CD0004055000), a beta-sheet (BtuB; PCDDDBID: CD0000102000) and an alpha-  
619 helical protein (amtB; PCDDDBID: CD0000099000) were used.

620

### 621 **[3H]-labeled Auxin Binding Assay**

*Niemeyer, M., et al*

622 Radioligand binding assays were performed as previously described<sup>70</sup> using purified  
623 ASK1-TIR1 protein complexes, GST-tagged AUX/IAAs incl. chimeric AUX/IAAs and  
624 [<sup>3</sup>H]IAA with a specific activity of 25 Ci/mmol (Hartmann Analytic). Final protein  
625 concentrations in a 100  $\mu$ L reaction were 0.01  $\mu$ M ASK1-TIR1 complex and 0.3  $\mu$ M  
626 AUX/IAAs. Complexes were allowed to form 1 h on ice, shaking. For non-specific  
627 binding controls, reactions contained additionally 2 mM cold IAA. Data was evaluated  
628 with GraphPad Prism v 5.04, and fitted using the “one site total and non-specific  
629 binding” preset.

630

### 631 **LexA Yeast Two Hybrid Assays**

632 LexA-based yeast two hybrid assays were performed using yeast transformed with the  
633 described constructs (DBD-fusions: EGY48+pSH18-34, pGILDA vector; AD-fusions:  
634 YM4271, pB42AD vector), freshly mated and grown on selection medium (Gal/Raff –  
635 Ura –His –Trp). Same amount of yeast cells ( $OD_{600} = 0.4$  or  $0.8$  for IAA12(-like)) were  
636 spotted on selection plates containing BU salts (final: 7 g/L  $Na_2HPO_4$ , 3 g/L  $NaH_2PO_4$ ,  
637 pH 7), X-Gal (final 80 mg/L) and the given auxin (IAA) concentration. Plates were  
638 incubated at 30°C for several days and constantly monitored. Expression of chimeric  
639 AUX/IAAs and TIR1 mutants in yeast were checked using immunoblot analysis on  
640 lysates from haploid yeast. 50 mL liquid selection medium (Gal/Raff -Ura -His or -Trp)  
641 were inoculated with an 1/25 volume overnight culture and grown till  $OD_{600} \approx 0.6$ ,  
642 harvested, washed with water and lysed in 200  $\mu$ L lysis buffer (0.1 M NaOH, 2 %  $\beta$ -  
643 mercaptoethanol, 2 % sodium dodecyl sulfate, 0.05 M EDTA, 200  $\mu$ M benzamidine, 1  
644 mM PMSF, Roche protease inhibitor cocktail) at 90°C for 10 min. After neutralization  
645 with 5  $\mu$ L 4 M sodium acetate for 10 min at 90°C, 50  $\mu$ L 4X Laemmli was added and  
646 samples were separated via SDS-PAGE and immunoblotted.

Niemeyer, M., et al

## 647 **In vitro reconstitution of Ub-conjugation**

648 *In vitro* ubiquitylation (IVU) reactions were performed as previously described<sup>31</sup>. In  
649 brief two protein mixtures (mix A and mix B) were prepared in parallel. Mix A contained  
650 50  $\mu$ M ubiquitin (Ub; Fluorescein-labeled Ub<sup>S20C</sup>: Ub<sup>K0</sup>; 4:1 mix), 0.2  $\mu$ M 6xHis-UBA1  
651 (E1) and 2  $\mu$ M 6xHis-AtUBC8 (E2) in reaction buffer (30 mM Tris-HCl, pH 8.0, 100 mM  
652 NaCl, 2 mM DTT, 5 mM MgCl<sub>2</sub>, 1  $\mu$ M ZnCl<sub>2</sub>, 2 mM ATP). Mix B contained 1  $\mu$ M  
653 Cul1·RBX1, 1  $\mu$ M ASK1·TIR1, and 5  $\mu$ M AUX/IAA protein in reaction buffer. Mix B was  
654 aliquoted and supplemented with IAA to reach the indicated final concentration.  
655 Mixtures A and B were separately incubated for 5 or 10 minutes at 25 °C, respectively.  
656 Equal volumes of mix A and B were combined, aliquots were taken at specified time  
657 points, and reactions were stopped by denaturation in Laemmli buffer. IVUs with  
658 chimeric AUX/IAAs were carried out 1 h with 1  $\mu$ M IAA. Immunodetection of Ub-  
659 conjugated proteins was performed using polyclonal anti-GST in rabbit (Sigma,  
660 G7781; 1:20,000) antibodies combined with secondary anti-rabbit Alexa Fluor® Plus  
661 647 antibody (1:20,000) (Thermo Fischer Scientific, A32733). Detection was  
662 performed with a Typhoon FLA 9500 system (473 nm excitation wavelength and LPB  
663 filter for fluorescein-labeled ubiquitin signal detection and 635 nm excitation  
664 wavelength and LPR filter for GST signal).

665 Quantification of ubiquitylated AUX/IAAs was performed using the in-gel fluorescein  
666 signal above GST-IAA7 and GST-IAA12, as well as the ubiquitin-modified Cullin (~50  
667 kDa) were quantified for each lane using ImageQuant TL software automatic lane  
668 detection. The reduction of unmodified GST-IAA7 and GST-IAA12 fusion proteins was  
669 quantified after blotting and immunodetection using the Alexa Fluor 647 signal, and  
670 automatic band detection. All signals were background subtracted (rubberband  
671 method).

*Niemeyer, M., et al*

672 **LC-MS analyses of IVU reactions**

673 Three sets of IVUs, corresponding to three biological replicates, were carried out on  
674 consecutive weeks using AUX/IAA proteins from different batch preparations. After 30  
675 minutes, IVUs were stopped by denaturing with urea, reduced with DTT and alkylated  
676 with iodoacetamide. Trypsin digestion was carried out overnight at 37°C. Upon  
677 quenching and desalting, peptides were separated using liquid chromatography C18  
678 reverse phase chemistry and later electrosprayed on-line into a QExactive Plus mass  
679 spectrometer (Thermo Fisher Scientific). MS/MS peptide sequencing was performed  
680 using a Top20 DDA scan strategy with HCD fragmentation. Ubiquitylated residues on  
681 identified peptides were mapped using GG and LRGG signatures (as tolerated  
682 variable modifications) from using both the Mascot software v2.5.0 (Matrix Science)  
683 linked to Proteome Discoverer v1.4 (Thermo Fisher Scientific) and the MaxQuant  
684 software v1.5.0.0. Mass spectrometry proteomics data are being currently curated at  
685 PRIDE repository, ProteomeXchange (<http://www.ebi.ac.uk/pride/archive/>). A dataset  
686 identifier will be shared upon acceptance of the manuscript.

687

688 **Cross-linking reactions**

689 DSBU (ThermoFisher) cross-linking reactions were performed for 1 h at 25°C with  
690 either 4-5 µM of ASK1-TIR1 and 5 µM iaa7bm3 or iaa12bm3 or 10 µM iaa7bm3 or  
691 iaa12bm3 alone. Proteins were pre-incubated 15 minutes in the presence or absence  
692 of 10 µM auxin (IAA) before addition of 1 mM DSBU (100 molar excess). After TRIS  
693 quenching, samples were sonicated in the presence of sodium deoxycholate, reduced  
694 with DTT, and alkylated with iodoacetamide. Alkylation was quenched by DTT, and  
695 the reactions were incubated with trypsin over night at 37°C. Digestion was stopped



*Niemeyer, M., et al*

696 with 10% TFA and after centrifugation (5 min 14.000 xg), peptide mixtures were  
697 analyzed via LC/MS.

698

### 699 **Mass spectrometry analyses of cross-linked peptides & data analysis**

700 Proteolytic peptide mixtures were analyzed by LC/MS/MS on an UltiMate 3000 RSLC  
701 nano-HPLC system coupled to an Orbitrap Fusion Tribrid mass spectrometer (Thermo  
702 Fisher Scientific). Peptides were separated on reversed phase C18 columns (trapping  
703 column: Acclaim PepMap 100, 300  $\mu\text{m} \times 5 \text{ mm}$ , 5 $\mu\text{m}$ , 100  $\text{\AA}$  (Thermo Fisher Scientific);  
704 separation column: self-packed Pico frit nanospray C18 column, 75  $\mu\text{m} \times 250 \text{ mm}$ , 1.9  
705  $\mu\text{m}$ , 80  $\text{\AA}$ , tip ID 10  $\mu\text{m}$  (New Objective)). After desalting the samples on the trapping  
706 column, peptides were eluted and separated using a linear gradient from 3% to 40%  
707 B (solvent A: 0.1% (v/v) formic acid in water, solvent B: 0.08% (v/v) formic acid in  
708 acetonitrile) with a constant flow rate of 300 nl/min over 90 min. Data were acquired in  
709 data-dependent MS/MS mode with stepped higher-energy collision-induced  
710 dissociation (HCD) and normalized collision energies of 27%, 30%, and 33%. Each  
711 high-resolution full scan ( $m/z$  299 to 1799,  $R = 120,000$  at  $m/z$  200) in the orbitrap was  
712 followed by high-resolution product ion scans ( $R = 30,000$ ), starting with the most  
713 intense signal in the full-scan mass spectrum (isolation window 2 Th); the target value  
714 of the automated gain control was set to 3,000,000 (MS) and 250,000 (MS/MS),  
715 maximum accumulation times were set to 50 ms (MS) and 200 ms (MS/MS) and the  
716 maximum cycle time was 5 s. Precursor ions with charge states  $<3+$  and  $>7+$  or were  
717 excluded from fragmentation. Dynamic exclusion was enabled (duration 60 seconds,  
718 window 2 ppm).

719 For cross-linking analysis, mass spectrometric \*.raw files were converted to mzML  
720 using Proteome Discoverer 2.0. MeroX analysis was performed with the following



*Niemeyer, M., et al*

721 settings: Proteolytic cleavage: C-terminal at Lys and Arg with 3 missed cleavages,  
722 peptides' length: 5 to 30, static modification: alkylation of Cys by IAA, variable  
723 modification: oxidation of M, cross-linker: DSBU with specificity towards Lys, Ser, Thr,  
724 Tyr, and N-termini, analysis mode: RISE-UP mode, minimum peptide score: 10,  
725 precursor mass accuracy: 3 ppm, product ion mass accuracy: 6 ppm (performing mass  
726 recalibration, average of deviations), signal-to-noise ratio: 1.5, precursor mass  
727 correction activated, prescore cut-off at 10% intensity, FDR cut-off: 1%, and minimum  
728 score cut-off: 60. For further analysis only cross-links found in at least 2/3 (IAA7) or  
729 3/4 (IAA12) experiments were considered.

730

### 731 **Cross-link-based docking using HADDOCK**

732 Comparative models of IAA7 and IAA12 PB1 domains were created using multi-  
733 sequence-structure-alignments (PIR formatted) as input for MODELLER 0.921<sup>71</sup>. The  
734 generated models were incorporated for the HADDOCK-based docking together with  
735 the available ASK1-TIR1 structure (PDB code: 2P1Q, resolution: R= 1.91 Å)<sup>20</sup>. A  
736 detailed description how to prepare pdb files and incorporated distance restraint can  
737 be found elsewhere. Formatted pdb files were uploaded to the HADDOCK server<sup>72,73</sup>  
738 using guru access level. To incorporate distance restraints, we used distances from  
739 intramolecular cross-links of known distance (see SUPP file docking parameters). We  
740 further added a distance restraint or not corresponding to the degron tail length  
741 calculated as described<sup>74</sup>. For each complex docked, 10,000 rigid body docking  
742 structures were generated followed by a second iteration (400 best structures). Finally,  
743 200 models/structures were water refined (explicit solvent) and clustered (FCC<sup>75</sup> at  
744 0.6 RMSD cutoff).

Niemeyer, M., et al

745 Using the same restraints, the possible conformational docking space of the PB1  
746 domains was searched and visualized using DisVis<sup>45,76,77</sup> with standard parameters.  
747 For image creation PyMOL<sup>TM</sup> (Version 2.1) and UCSF Chimera<sup>78</sup> were used.

748

### 749 **Molecular dynamic simulations (MDS) of protein-protein complexes**

750 One refined structure of each group, derived from the cross-link-based docking by  
751 HADDOCK incorporating the disorder restraint (2 groups for IAA7<sup>PB1</sup>·TIR1; 3 groups  
752 for IAA12<sup>PB1</sup>·TIR1), was used as starting structure for MD simulations. The 5 structures  
753 were prepared using structure preparation and protonate 3D (pH = 7.5) modules and  
754 subsequently minimized with AMBER10 force-field in MOE 2019.0101 (Chemical  
755 Computing Group Inc., Montreal, Quebec, Canada).

756 Molecular dynamic simulations were performed with the GROMACS software package  
757 (version 4.6.5)<sup>79</sup>. The parameters corresponding to the proteins were generated with  
758 AMBER99SB-ILDN force-field<sup>80</sup>, TIP3P explicit solvation model<sup>81</sup> was used and  
759 electro-neutrality was guaranteed with a NaCl concentration of 0.2 mol/L. The protocol  
760 employed here to perform MD simulations involves prior energy minimization and  
761 position-restrained equilibration, as outlined by Lindahl<sup>82</sup> for lysozyme in water. Once  
762 the system was equilibrated, we proceeded to the productive dynamic simulation  
763 without position restraint for 20 ns.

764

### 765 **Effective binding free energy calculations using MM-GBSA**

766 The effective binding free energy ( $\Delta G_{eff}$ ) of the protein-protein complexes formation  
767 was calculated using MMPBSA.py from Amber18 package employing the MM-GBSA  
768 method<sup>83</sup>. We followed the single trajectory approach, in which the trajectories for the  
769 free proteins were extracted from that of the protein-protein complexes.  $GB^{OBC1}$  and

*Niemeyer, M., et al*

770 *GB<sup>0BC2</sup>* implicit solvation models were employed<sup>83</sup>. The accumulated mean value of  
771  $\Delta G_{eff}$  were obtained every 10 ps from the productive MD simulation.

772 Energetically-relevant residues (hot-spots) at the interfaces of TIR1-AUX/IAA PB1  
773 complexes were predicted by using the per-residue effective free energy  
774 decomposition (prEFED) protocol implemented in MMPBSA.py<sup>83</sup>. Hot-spot residues  
775 were defined as those with a side-chain energy contribution ( $\Delta G_{sc}$ ) of  $\leq -1.0$  kcal/mol.  
776 We used Computational Alanine Scanning (CAS)<sup>83</sup> to further assess per-residue free  
777 energy contributions. Alanine single-point mutations were generated on previously  
778 identified hot-spots from the prEFED protocol. Both prEFED and CAS protocols were  
779 performed from the last 10 ns of the MD simulation.

780  
781  
782  
783  
784  
785  
786  
787  
788  
789  
790  
791  
792  
793  
794  
795  
796  
797  
798  
799  
800  
801  
802  
803  
804  
805  
806  
807  
808  
809  
810  
811  
812  
813  
814  
815  
816  
817  
818  
819  
820  
821  
822  
823  
824  
825  
826  
827  
828  
829  
830  
831  
832  
833  
834

## References

1. Chen, B., Retzlaff, M., Roos, T. & Frydman, J. Cellular strategies of protein quality control. *Cold Spring Harb Perspect Biol* **3**, a004374 (2011).
2. Hershko, A. & Ciechanover, A. The ubiquitin system. *Annu Rev Biochem* **67**, 425-79 (1998).
3. Komander, D. & Rape, M. The ubiquitin code. *Annu Rev Biochem* **81**, 203-29 (2012).
4. Oh, E., Akopian, D. & Rape, M. Principles of Ubiquitin-Dependent Signaling. *Annu Rev Cell Dev Biol* **34**, 137-162 (2018).
5. Hua, Z. & Vierstra, R.D. The cullin-RING ubiquitin-protein ligases. *Annu Rev Plant Biol* **62**, 299-334 (2011).
6. Hao, B. et al. Structural basis of the Cks1-dependent recognition of p27(Kip1) by the SCF(Skp2) ubiquitin ligase. *Mol Cell* **20**, 9-19 (2005).
7. Guharoy, M., Bhowmick, P., Sallam, M. & Tompa, P. Tripartite degrons confer diversity and specificity on regulated protein degradation in the ubiquitin-proteasome system. *Nat Commun* **7**, 10239 (2016).
8. Mattioli, F. & Sixma, T.K. Lysine-targeting specificity in ubiquitin and ubiquitin-like modification pathways. *Nat Struct Mol Biol* **21**, 308-16 (2014).
9. Tang, X. et al. Suprafacial orientation of the SCFCdc4 dimer accommodates multiple geometries for substrate ubiquitination. *Cell* **129**, 1165-76 (2007).
10. Guharoy, M., Bhowmick, P. & Tompa, P. Design Principles Involving Protein Disorder Facilitate Specific Substrate Selection and Degradation by the Ubiquitin-Proteasome System. *J Biol Chem* **291**, 6723-31 (2016).
11. Prakash, S., Tian, L., Ratliff, K.S., Lehotzky, R.E. & Matouschek, A. An unstructured initiation site is required for efficient proteasome-mediated degradation. *Nat Struct Mol Biol* **11**, 830-7 (2004).
12. Pietrosevoli, N., Garcia-Martin, J.A., Solano, R. & Pazos, F. Genome-wide analysis of protein disorder in *Arabidopsis thaliana*: implications for plant environmental adaptation. *PLoS One* **8**, e55524 (2013).
13. Pazos, F., Pietrosevoli, N., Garcia-Martin, J.A. & Solano, R. Protein intrinsic disorder in plants. *Front Plant Sci* **4**, 363 (2013).
14. Covarrubias, A.A., Cuevas-Velazquez, C.L., Romero-Perez, P.S., Rendon-Luna, D.F. & Chater, C.C.C. Structural disorder in plant proteins: where plasticity meets sessility. *Cell Mol Life Sci* **74**, 3119-3147 (2017).
15. Staby, L. et al. Eukaryotic transcription factors: paradigms of protein intrinsic disorder. *Biochem J* **474**, 2509-2532 (2017).
16. Chapman, E.J. & Estelle, M. Mechanism of auxin-regulated gene expression in plants. *Annu Rev Genet* **43**, 265-85 (2009).
17. Abel, S., Nguyen, M.D. & Theologis, A. The PS-IAA4/5-like family of early auxin-inducible mRNAs in *Arabidopsis thaliana*. *J Mol Biol* **251**, 533-49 (1995).
18. Worley, C.K. et al. Degradation of Aux/IAA proteins is essential for normal auxin signalling. *Plant J* **21**, 553-62 (2000).
19. Liscum, E. & Reed, J.W. Genetics of Aux/IAA and ARF action in plant growth and development. *Plant Mol Biol* **49**, 387-400 (2002).
20. Tan, X. et al. Mechanism of auxin perception by the TIR1 ubiquitin ligase. *Nature* **446**, 640-5 (2007).
21. Calderón Villalobos, L.I. et al. A combinatorial TIR1/AFB-Aux/IAA co-receptor system for differential sensing of auxin. *Nat Chem Biol* **8**, 477-85 (2012).
22. Gray, W.M., Kepinski, S., Rouse, D., Leyser, O. & Estelle, M. Auxin regulates SCF(TIR1)-dependent degradation of AUX/IAA proteins. *Nature* **414**, 271-6 (2001).
23. Vernoux, T. et al. The auxin signalling network translates dynamic input into robust patterning at the shoot apex. *Mol Syst Biol* **7**, 508 (2011).
24. Tiwari, S.B., Wang, X.J., Hagen, G. & Guilfoyle, T.J. AUX/IAA proteins are active repressors, and their stability and activity are modulated by auxin. *Plant Cell* **13**, 2809-22 (2001).

Niemeyer, M., et al

- 835 25. Flores-Sandoval, E., Eklund, D.M. & Bowman, J.L. A Simple Auxin Transcriptional  
836 Response System Regulates Multiple Morphogenetic Processes in the Liverwort  
837 *Marchantia polymorpha*. *PLoS Genet* **11**, e1005207 (2015).
- 838 26. Rensing, S.A. et al. The Physcomitrella genome reveals evolutionary insights into the  
839 conquest of land by plants. *Science* **319**, 64-9 (2008).
- 840 27. Overvoorde, P.J. et al. Functional genomic analysis of the AUXIN/INDOLE-3-ACETIC  
841 ACID gene family members in *Arabidopsis thaliana*. *Plant Cell* **17**, 3282-300 (2005).
- 842 28. Dreher, K.A., Brown, J., Saw, R.E. & Callis, J. The *Arabidopsis* Aux/IAA protein family  
843 has diversified in degradation and auxin responsiveness. *Plant Cell* **18**, 699-714  
844 (2006).
- 845 29. Moss, B.L. et al. Rate Motifs Tune Auxin/Indole-3-Acetic Acid Degradation Dynamics.  
846 *Plant Physiol* **169**, 803-13 (2015).
- 847 30. Ramos, J.A., Zenser, N., Leyser, O. & Callis, J. Rapid degradation of  
848 auxin/indoleacetic acid proteins requires conserved amino acids of domain II and is  
849 proteasome dependent. *Plant Cell* **13**, 2349-60 (2001).
- 850 31. Winkler, M. et al. Variation in auxin sensing guides AUX/IAA transcriptional repressor  
851 ubiquitylation and destruction. *Nat Commun* **8**, 15706 (2017).
- 852 32. Meszaros, B., Erdos, G. & Dosztanyi, Z. IUPred2A: context-dependent prediction of  
853 protein disorder as a function of redox state and protein binding. *Nucleic Acids Res* **46**,  
854 W329-W337 (2018).
- 855 33. Mutte, S.K. et al. Origin and evolution of the nuclear auxin response system. *Elife*  
856 **7**(2018).
- 857 34. Uversky, V.N. Cracking the folding code. Why do some proteins adopt partially folded  
858 conformations, whereas other don't? *FEBS Lett* **514**, 181-3 (2002).
- 859 35. Engler, C., Gruetzner, R., Kandzia, R. & Marillonnet, S. Golden gate shuffling: a one-  
860 pot DNA shuffling method based on type IIs restriction enzymes. *PLoS One* **4**, e5553  
861 (2009).
- 862 36. Uversky, V.N. A decade and a half of protein intrinsic disorder: biology still waits for  
863 physics. *Protein Sci* **22**, 693-724 (2013).
- 864 37. Sigalov, A.B. Structural biology of intrinsically disordered proteins: Revisiting unsolved  
865 mysteries. *Biochimie* **125**, 112-8 (2016).
- 866 38. Iacobucci, C. et al. A cross-linking/mass spectrometry workflow based on MS-  
867 cleavable cross-linkers and the MeroX software for studying protein structures and  
868 protein-protein interactions. *Nat Protoc* **13**, 2864-2889 (2018).
- 869 39. Sinz, A. Divide and conquer: cleavable cross-linkers to study protein conformation and  
870 protein-protein interactions. *Anal Bioanal Chem* **409**, 33-44 (2017).
- 871 40. Gotze, M., Iacobucci, C., Ihling, C.H. & Sinz, A. A Simple Cross-Linking/Mass  
872 Spectrometry Workflow for Studying System-wide Protein Interactions. *Anal Chem* **91**,  
873 10236-10244 (2019).
- 874 41. Korasick, D.A. et al. Molecular basis for AUXIN RESPONSE FACTOR protein  
875 interaction and the control of auxin response repression. *Proc Natl Acad Sci U S A*  
876 **111**, 5427-32 (2014).
- 877 42. Nanao, M.H. et al. Structural basis for oligomerization of auxin transcriptional  
878 regulators. *Nat Commun* **5**, 3617 (2014).
- 879 43. Han, M. et al. Structural basis for the auxin-induced transcriptional regulation by  
880 Aux/IAA17. *Proc Natl Acad Sci U S A* **111**, 18613-8 (2014).
- 881 44. Dinesh, D.C. et al. Solution structure of the PsIAA4 oligomerization domain reveals  
882 interaction modes for transcription factors in early auxin response. *Proc Natl Acad Sci*  
883 *U S A* (2015).
- 884 45. van Zundert, G.C. & Bonvin, A.M. DisVis: quantifying and visualizing accessible  
885 interaction space of distance-restrained biomolecular complexes. *Bioinformatics* **31**,  
886 3222-4 (2015).
- 887 46. Luo, J., Zhou, J.J. & Zhang, J.Z. Aux/IAA Gene Family in Plants: Molecular Structure,  
888 Regulation, and Function. *Int J Mol Sci* **19**(2018).



Niemeyer, M., et al

- 889 47. O'Shea, C. et al. Structures and Short Linear Motif of Disordered Transcription Factor  
890 Regions Provide Clues to the Interactome of the Cellular Hub Protein Radical-induced  
891 Cell Death1. *J Biol Chem* **292**, 512-527 (2017).
- 892 48. Arai, M., Sugase, K., Dyson, H.J. & Wright, P.E. Conformational propensities of  
893 intrinsically disordered proteins influence the mechanism of binding and folding. *Proc*  
894 *Natl Acad Sci U S A* **112**, 9614-9 (2015).
- 895 49. Davey, N.E. et al. SLIMPrints: conservation-based discovery of functional motif  
896 fingerprints in intrinsically disordered protein regions. *Nucleic Acids Res* **40**, 10628-41  
897 (2012).
- 898 50. Zarin, T. et al. Proteome-wide signatures of function in highly diverged intrinsically  
899 disordered regions. *Elife* **8**(2019).
- 900 51. Kato, H., Nishihama, R., Weijers, D. & Kohchi, T. Evolution of nuclear auxin signaling:  
901 lessons from genetic studies with basal land plants. *J Exp Bot* **69**, 291-301 (2018).
- 902 52. Csizmok, V. et al. An allosteric conduit facilitates dynamic multisite substrate  
903 recognition by the SCF(Cdc4) ubiquitin ligase. *Nat Commun* **8**, 13943 (2017).
- 904 53. Keul, N.D. et al. The entropic force generated by intrinsically disordered segments  
905 tunes protein function. *Nature* **563**, 584-588 (2018).
- 906 54. Davey, N.E. et al. Attributes of short linear motifs. *Mol Biosyst* **8**, 268-81 (2012).
- 907 55. Abel, S., Oeller, P.W. & Theologis, A. Early auxin-induced genes encode short-lived  
908 nuclear proteins. *Proc Natl Acad Sci U S A* **91**, 326-30 (1994).
- 909 56. Bard, J.A.M., Bashore, C., Dong, K.C. & Martin, A. The 26S Proteasome Utilizes a  
910 Kinetic Gateway to Prioritize Substrate Degradation. *Cell* **177**, 286-298 e15 (2019).
- 911 57. Fishbain, S. et al. Sequence composition of disordered regions fine-tunes protein half-  
912 life. *Nat Struct Mol Biol* **22**, 214-21 (2015).
- 913 58. Fishbain, S., Prakash, S., Herrig, A., Elsasser, S. & Matouschek, A. Rad23 escapes  
914 degradation because it lacks a proteasome initiation region. *Nat Commun* **2**, 192  
915 (2011).
- 916 59. Ferreon, A.C.M., Ferreon, J.C., Wright, P.E. & Deniz, A.A. Modulation of allostery by  
917 protein intrinsic disorder. *Nature* **498**, 390-+ (2013).
- 918 60. Powers, S.K. et al. Nucleo-cytoplasmic Partitioning of ARF Proteins Controls Auxin  
919 Responses in Arabidopsis thaliana. *Mol Cell* (2019).
- 920 61. Madeira, F. et al. The EMBL-EBI search and sequence analysis tools APIs in 2019.  
921 *Nucleic Acids Res* **47**, W636-W641 (2019).
- 922 62. UniProt, C. UniProt: a worldwide hub of protein knowledge. *Nucleic Acids Res* **47**,  
923 D506-D515 (2019).
- 924 63. Letunic, I. & Bork, P. Interactive Tree Of Life (iTOL) v4: recent updates and new  
925 developments. *Nucleic Acids Res* **47**, W256-W259 (2019).
- 926 64. Hanson, J., Yang, Y., Paliwal, K. & Zhou, Y. Improving protein disorder prediction by  
927 deep bidirectional long short-term memory recurrent neural networks. *Bioinformatics*  
928 **33**, 685-692 (2017).
- 929 65. Ishida, T. & Kinoshita, K. PrDOS: prediction of disordered protein regions from amino  
930 acid sequence. *Nucleic Acids Res* **35**, W460-4 (2007).
- 931 66. Artimo, P. et al. ExPASy: SIB bioinformatics resource portal. *Nucleic Acids Res* **40**,  
932 W597-603 (2012).
- 933 67. Wilkins, M.R. et al. Protein identification and analysis tools in the ExPASy server.  
934 *Methods Mol Biol* **112**, 531-52 (1999).
- 935 68. Kyte, J. & Doolittle, R.F. A simple method for displaying the hydropathic character of a  
936 protein. *J Mol Biol* **157**, 105-32 (1982).
- 937 69. Uversky, V.N. Use of fast protein size-exclusion liquid chromatography to study the  
938 unfolding of proteins which denature through the molten globule. *Biochemistry* **32**,  
939 13288-98 (1993).
- 940 70. Hellmuth, A. & Calderón Villalobos, L.I. Radioligand Binding Assays for Determining  
941 Dissociation Constants of Phytohormone Receptors. *Methods Mol Biol* **1450**, 23-34  
942 (2016).

Niemeyer, M., et al

- 943 71. Webb, B. & Sali, A. Protein Structure Modeling with MODELLER. *Methods Mol Biol*  
944 **1654**, 39-54 (2017).
- 945 72. Dominguez, C., Boelens, R. & Bonvin, A.M. HADDOCK: a protein-protein docking  
946 approach based on biochemical or biophysical information. *J Am Chem Soc* **125**, 1731-  
947 7 (2003).
- 948 73. van Zundert, G.C.P. et al. The HADDOCK2.2 Web Server: User-Friendly Integrative  
949 Modeling of Biomolecular Complexes. *J Mol Biol* **428**, 720-725 (2016).
- 950 74. Hamdi, K. et al. Structural disorder and induced folding within two cereal, ABA stress  
951 and ripening (ASR) proteins. *Sci Rep* **7**, 15544 (2017).
- 952 75. Rodrigues, J.P. et al. Clustering biomolecular complexes by residue contacts similarity.  
953 *Proteins* **80**, 1810-7 (2012).
- 954 76. Nakikj, D. & Mamykina, L. DisVis: Visualizing Discussion Threads in Online Health  
955 Communities. *AMIA Annu Symp Proc* **2016**, 944-953 (2016).
- 956 77. van Zundert, G.C. et al. The DisVis and PowerFit Web Servers: Explorative and  
957 Integrative Modeling of Biomolecular Complexes. *J Mol Biol* **429**, 399-407 (2017).
- 958 78. Pettersen, E.F. et al. UCSF Chimera--a visualization system for exploratory research  
959 and analysis. *J Comput Chem* **25**, 1605-12 (2004).
- 960 79. Pronk, S. et al. GROMACS 4.5: a high-throughput and highly parallel open source  
961 molecular simulation toolkit. *Bioinformatics* **29**, 845-54 (2013).
- 962 80. Hornak, V. et al. Comparison of multiple Amber force fields and development of  
963 improved protein backbone parameters. *Proteins* **65**, 712-25 (2006).
- 964 81. Jorgensen, W.L., Chandrasekhar, J., Madura, J.D., Impey, R.W. & Klein, M.L.  
965 Comparison of Simple Potential Functions for Simulating Liquid Water. *Journal of*  
966 *Chemical Physics* **79**, 926-935 (1983).
- 967 82. Lindahl, E. Molecular dynamics simulations. *Methods Mol Biol* **1215**, 3-26 (2015).
- 968 83. Case, D.A.B.-S., I. Y.; Brozell, S. R.; Cerutti, D. S.; T.E. Cheatham, I.; Cruzeiro, V.  
969 W. D.; Darden, T. A.; Duke, R. E.; Ghoreishi, D.; Gilson, M. K.; Gohlke, H.; Goetz,  
970 A. W.; Greene, D.; Harris, R.; Homeyer, N.; Izadi, S.; Kovalenko, A.; Kurtzman, T.;  
971 Lee, T. S.; LeGrand, S.; Li, P.; Lin, C.; Liu, J.; Luchko, T.; Luo, R.; Mermelstein,  
972 D. J.; Merz, K. M.; Miao, Y.; Monard, G.; Nguyen, C.; Nguyen, H.; Omelyan, I.;  
973 Onufriev, A.; Pan, F.; Qi, R.; Roe, D. R.; Roitberg, A.; Sagui, C.; Schott-Verdugo,  
974 S.; Shen, J.; Simmerling, C. L.; Smith, J.; Salomon-Ferrer, R.; Swails, J.; Walker,  
975 R. C.; Wang, J.; Wei, H.; Wolf, R. M.; Wu, X.; Xiao, L.; York, D. M.; Kollman, P. A.  
976 . AMBER 2018. (University of California, San Francisco, 2018).

977

978

*Niemeyer, M., et al*

979 **Acknowledgements**

980 We thank Wolfgang Brandt for initial in silico models of AUX/IAA PB1 domains, and  
981 Silvestre Marillonet for the design of constructs for Golden Gate Technology. This work  
982 was supported by the Deutsche Forschungsgemeinschaft (DFG, research project  
983 CA716/2-1), and core funding of the Leibniz Institute of Plant Biochemistry (IPB).



*Niemeyer, M., et al*

984 **Author contributions**

985 M.N. and L.I.A.C.V. prepared the manuscript and designed experiments. M.N.  
986 performed biochemical experiments and analyzed the data. M.N., C.I. and C.H.I.  
987 carried out XL-MS experiments and data analysis. P.K. and M.N carried out all  
988 HADDOCK-based approaches including DisVis, and E.M.C. computational calculation  
989 and simulations. M.N., A.H. and V.W. generated Y2H constructs and performed the  
990 assays. M.N. performed ubiquitylation experiments, and together with W.H. analyzed  
991 mass spectral data of ubiquitylation sites. S.S. and M.Z. carried out ratiometric  
992 experiments and analyzed the data. E.M.C., C.I, C.I., P.K., and A.S. provided input to  
993 the manuscript. All authors approved the intellectual content.

*Niemeyer, M., et al*

994 **Competing Interest Statement**

995 The authors declared no competing interests.

*Niemeyer, M., et al*

996 **Additional Information**

997 Supplementary information is available online. Mass spectrometry proteomics data  
998 have been deposited to the ProteomeXchange Consortium via the PRIDE partner  
999 repository with the data sets identifiers: PXD015285 (XL-MS) and (forthcoming, under  
1000 curation) (ubiquitylation site identification data). Correspondence and request for  
1001 materials should be addressed to L.I.A.C.V.

Niemeyer, M., et al

1002 **Figure Legends**

1003 **Figure 1| AUX/IAA proteins are intrinsically disordered outside the PB1 domain.**

1004 (a) Simplified phylogenetic tree of 29 *Arabidopsis thaliana* AUX/IAAs showing their  
1005 sequence composition based on IUPred2A prediction for disorder (score classification:  
1006 disorder: >0.6; intermediate: 0.4-0.6; ordered: <0.4). Outer circles correspond to full  
1007 length proteins, inner circles represent disorder prediction excluding the PB1 domain.  
1008 (b) *In silico* prediction maps of disorder along the IAA7 and IAA12 sequence using  
1009 SPOT, IUPRED1 and PrDos algorithms. AUX/IAA domain structure (Domain I (DI), a  
1010 linker, a core degron, a degron tail and the Phox/Bem1p (PB1) domain) is displayed.  
1011 Outer plots represent Kyte-Doolittle hydrophathy (scale from -4 to +4). Dotted line in  
1012 PrDos prediction represents a 0.5 threshold. (c) Circular dichroism spectra of IAA7  
1013 (orange) and IAA12 (aquamarine) oligomerization and PB1-less deficient variants  
1014 (dashed colored lines) show the lack of defined secondary structure elements outside  
1015 of the PB1 domain. Reference spectra (gray dotted lines) are depicted. Ellipticity is  
1016 calculated as mean residual ellipticity (MRE). (d) IAA7 (orange) and IAA12  
1017 (aquamarine) exhibit an extended fold according to Stokes radii determination via size  
1018 exclusion chromatography. Theoretical Stokes radii of known folds (gray, labeled  
1019 rectangles): intrinsically disordered protein (IDP), pre-molten globule (PMG), molten  
1020 globule (MG), natively folded (NF) plus 10% outer limits, and experimental values  
1021 (colored box plots) (generated with RStudio, default settings; n = 4-9). IAA7 and IAA12  
1022 classify as MG/PMG-like proteins (bm3 variants) with less folded PMG/IDP-like  
1023 features outside the PB1 domain ( $\Delta$ PB1 variants).

1024

Niemeyer, M., et al

1025 **Figure 2| Auxin-dependent TIR1-IAA7 and TIR1-IAA12 interactions rely on the**  
1026 **core degron, and a flexible IDR located at a suitable distance between the**  
1027 **degron and the PB1 domain. (a)** Y2H interaction matrix (left) for TIR1 with ASK1,  
1028 and 16 chimeric proteins built fusing IAA7 and IAA12 segments flanked by  
1029 conserved motifs throughout the AUX/IAA family. Yeast diploids containing LexA  
1030 DBD-TIR1 and AD-AUX/IAA chimeras were spotted to selective medium with  
1031 increasing IAA concentrations, and  $\beta$ -galactosidase reporter expression indicated  
1032 auxin-induced TIR1-AUX/IAA interactions. AD-empty vector, negative control.  
1033 Domain organization and composition of seamless chimeric IAA7 and IAA12  
1034 constructs depicted in boxes (right) with DI (white) (till KR motif), linker (light gray),  
1035 core degron (red), degron tail (light pink), and PB1 domain (dark gray). Deleted  
1036 domains are indicated (delta ( $\Delta$ )). **(b-c)** Saturation binding assays using [ $^3$ H]IAA to  
1037 recombinant ASK1-TIR1-IAA7 (orange) or ASK1-TIR1-IAA12 (aquamarine) ternary  
1038 complexes. TIR1-IAA7 complex exhibits a high affinity ( $K_d \sim 20$  nM) for auxin,  
1039 whereas IAA12-containing co-receptor complexes provide ten-fold lower affinity for  
1040 auxin ( $K_d \sim 200$  nM). Oligomerization-deficient IAA7bm3 and IAA12bm3 variants, and  
1041 chimeric AUX/IAA proteins in complex with ASK1-TIR1 distinctly affect auxin bind  
1042 capabilities of a co-receptor system. Shown are saturation binding curves for each  
1043 co-receptor pair as relative [ $^3$ H]IAA binding normalized to the highest value of each  
1044 curve **(b-c)**. Each point reflects technical triplicates as mean  $\pm$ SEM (n=2-3). **(d)**  
1045 Comparison of dissociation constants ( $K_d$ ) obtained in saturation binding  
1046 experiments for each ASK1-TIR1-AUX/IAA ternary complex. Shown are mean  
1047 values and standard deviation, or maximum and minimum, if applicable.  
1048

Niemeyer, M., et al

1049 **Figure 3| Auxin-driven and SCF<sup>TIR1</sup>-dependent ubiquitylation of IAA7 and IAA12**  
1050 **display distinct dynamics. (a)** IVU assays with recombinant GST-IAA7 or GST-  
1051 IAA12, E1 (AtUBA1), E2 (AtUBC8), reconstituted SCF<sup>TIR1</sup> (*AtSKP1*·TIR1, *HsCul1*  
1052 and *MmRBX1*), fluorescein-labeled ubiquitin (Ub) and IAA (auxin). IAA7 and IAA12  
1053 ubiquitylation is auxin-driven and time-dependent. Basal ubiquitylation (auxin-  
1054 independent) of IAA7 starts in less than 30 mins. Ubiquitylation was monitored using  
1055 the ubiquitin fluorescent signal (green), and anti-GST/Alexa Fluor 647-conjugated  
1056 antibodies for detection of GST-AUX/IAAs (red). ImageQuantTL software was used  
1057 for quantification (middle), and generation of merged image (bottom). **(b)** IAA7 and  
1058 IAA12 IVU samples were analyzed via LC-MS, and putative ubiquitylation sites  
1059 detected by the diGly (or LRGG) Ub remnant after tryptic digest, were mapped  
1060 relative to the domain structure. IAA12 Ub sites agglomerate in the region upstream  
1061 of the degron (white) and the degron tail (light pink). **(c)** Ubiquitin-conjugation on  
1062 chimeric IAA7 and IAA12 proteins in the presence or absence of 1  $\mu$ M IAA. IVU  
1063 reaction time 1h. Ubiquitin conjugates on chimeric proteins lacking a degron tail or  
1064 the PB1 domain are evidently reduced, which is in agreement with the identified  
1065 IAA7 and IAA12 Ub sites. (\*) Asterisks depict the unmodified AUX/IAAs.

1066

1067 **Figure 4| Structural proteomics using an MS-cleavable cross-linker reveals**  
1068 **TIR1-IAA7 and TIR1-IAA12 interaction interfaces. (a)** Workflow for the cross-  
1069 linking coupled to mass spectrometry (XL-MS) approach. Recombinant oligomeric-  
1070 deficient IAA7 (orange) and IAA12 (aquamarine) proteins, and ASK1·TIR1 (gray and  
1071 light pink) were incubated with the DSBU cross-linker, and samples were analyzed  
1072 using LC/MS/MS. Cross-linked peptides were identified using the MeroX software.  
1073 **(b)** Interaction interfaces (blue) on TIR1 converge in two distinct patches around

*Niemeyer, M., et al*

1074 residues K217, K226 and T229 (cluster 1) or K485, S503 and K529 (cluster 2)  
1075 revealing AUX/IAAs adopt an extended fold when in complex with TIR1. **(c-d)**  
1076 Circular depiction of inter-protein (blue) and intra-protein (red) cross-links along IAA7  
1077 (orange), IAA12 (aquamarine), TIR1 (light pink) and ASK1 (gray) protein sequence.  
1078 Cross-links were identified in at least 2/3 or 3/4 independent experiments (dashed:  
1079 2/3 and 3/4; solid lines: 3/3 and 4/4). High number of intra-protein cross-links (red)  
1080 within AUX/IAAs show a high degree of flexibility characteristic of intrinsically  
1081 disordered regions (IDRs). Specific cross-links within TIR1 are in agreement with the  
1082 crystal structure (PDB: 2P1Q). Inter-protein crosslinks (blue) in the ASK1·TIR1·IAA7  
1083 complex mainly occurred between the N-terminus of IAA7 and the C-terminus of  
1084 TIR1. Regions downstream of the IAA7 and IAA12 degron preferably cross-linked  
1085 with a distinct region on TIR1 (K217, K226, T229). Known motifs and protein  
1086 domains are displayed. High variability in TIR1·IAA12 cross-links hints toward a  
1087 flexible and less-defined interaction interface, which reflect on the low auxin binding  
1088 affinity of a TIR1·IAA12 co-receptor complex.

1089

1090 **Figure 5| Cross-linking-based docking substantiates the function of the**  
1091 **disordered degron tail positioning the PB1 domain of AUX/IAAs on TIR1.** PB1  
1092 domains of IAA7 (light orange) and IAA12 (aquamarine) were docked on the  
1093 ASK1·TIR1 (gray, light pink) structure via HADDOCK using cross-linking data as  
1094 main constraint. **(a-b)** Including the length of the disordered degron tail of IAA7 (36  
1095 aa) or IAA12 (49 aa) as additional restraint, conspicuously reduces the  
1096 conformational space, and the number of accessible TIR1·AUX/IAA PB1 complexes  
1097 **(c-d)** Visualization of the possible conformational space occupied by the PB1 domain  
1098 on the ASK1·TIR1 protein complex without **(c)** or with **(d)** the degron tail length as

*Niemeyer, M., et al*

1099 distance restraint. The possible interaction space of the IAA12 PB1 domain on TIR1  
1100 is much broader than the IAA7 PB1. This is an evidence the conformational space  
1101 for the IAA7 PB1 on TIR1 is much more restricted, especially when the degron tail  
1102 restraint is built-in. See Supplementary Fig. 12 for best-scoring atomic detailed  
1103 models.

1104

1105 **Figure 6| Molecular dynamics (MD) simulations using HADDOCK-based**  
1106 **docking models reveal energetic favorable TIR1·AUX/IAA PB1 interacting**  
1107 **moieties. (a-b)** Time evolution of instantaneous  $\Delta G_{\text{eff}}$  values over 20 ns identifying  
1108 and refining stable TIR1·AUX/IAA PB1 complexes from HADDOCK best scoring  
1109 groups. Black lines indicate the accumulated mean value of  $\Delta G_{\text{eff}}$  for each trajectory.  
1110 For both complexes, TIR1·IAA7 PB1 (dark and light orange) **(a)**, and TIR1·IAA12  
1111 PB1 (blues and green) **(b)**, one stable complex (group 2, light orange (IAA7) or  
1112 aquamarine (IAA12)) characterized by a continuous low energetic state was  
1113 identified. Dotted vertical line at 10 ns indicates the time point of equilibrium used as  
1114 a reference for subsequent analysis. **(c)** Energetically relevant TIR1 residues for  
1115 complex stabilization identified by computational alanine scanning (CAS) using MD  
1116 trajectories (in **a & b**) from the equilibration time point onwards. **(d)** Stick  
1117 representation of CAS identified residues in TIR1 (light pink) localize to the leucine-  
1118 rich-repeats 3-6 (LRR3-6) forming a polar patch that allows interaction with the PB1  
1119 domain. **(e)** Yeast-two hybrid (Y2H) interaction matrix for TIR1 wild type and TIR1-  
1120 mutant versions carrying amino acid exchanges on relevant CAS-identified residues  
1121 with ASK1, IAA7 and IAA12 at different auxin concentrations.

1122



*Niemeyer, M., et al*

1123 **Figure 7| Model for ASK1-TIR1-AUX/IAA complex assembly fine-tuned by IDRs**  
1124 **flanking the AUX/IAA core degron.** The F-Box Protein TIR1 of the SCF<sup>TIR1</sup> E3  
1125 ubiquitin ligase recruits AUX/IAA targets for their ubiquitylation and degradation. The  
1126 phytohormone auxin and a core degron in AUX/IAAs are essential for AUX/IAA  
1127 recognition. Intrinsically disordered regions (IDRs) flanking the degron provide high  
1128 flexibility and an extended fold to AUX/IAAs, and influence TIR1-AUX/IAA complex  
1129 formation. At least two different routes are possible for dynamic AUX/IAA recruitment  
1130 and UPS-mediated degradation: *i)* auxin-triggered association between TIR1 and the  
1131 core AUX/IAA degron paves the way for positioning adjacent IDRs, which exposes  
1132 ubiquitin acceptor sites for efficient ubiquitylation; *ii)* transient auxin-independent  
1133 interactions between IDRs, as well as the PB1 domain in AUX/IAAs and two patches  
1134 of residues at opposite sides of TIR1, assist on auxin binding and offer tailored  
1135 positioning. The residency time of an AUX/IAA target on TIR1, when assembled in  
1136 an SCF-complex, propels processivity of AUX/IAA ubiquitylation, and impinges on  
1137 availability of IDRs as initiation sites for degradation by the 26S proteasome.

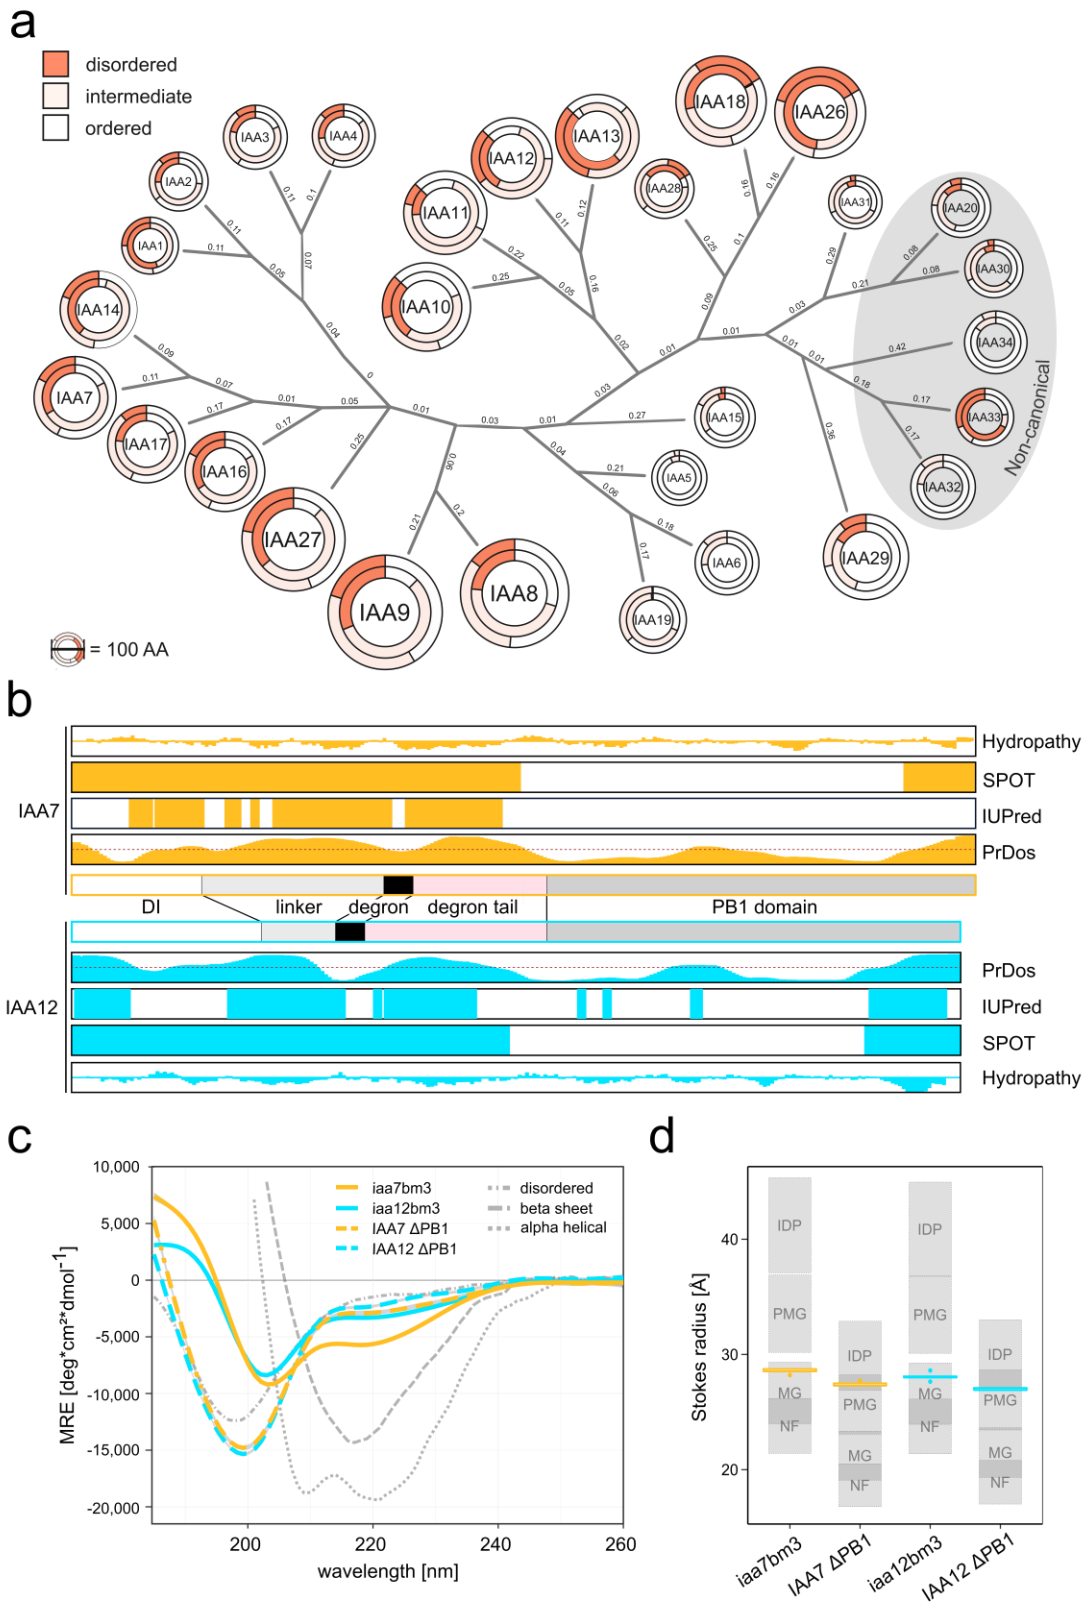

Figure 1

a

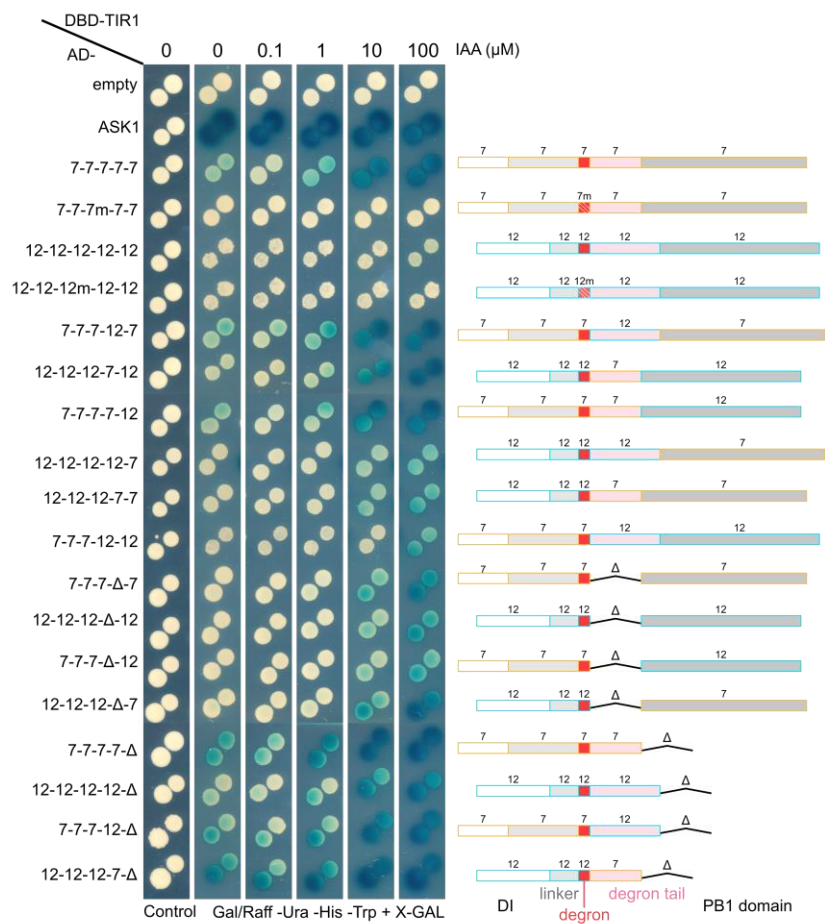

b

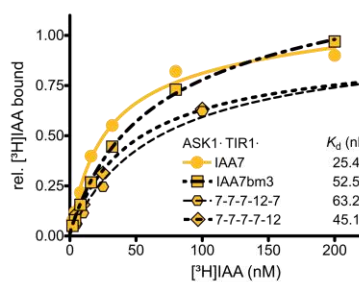

c

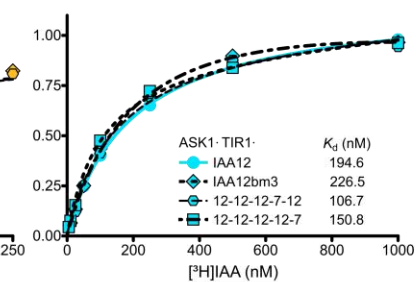

d

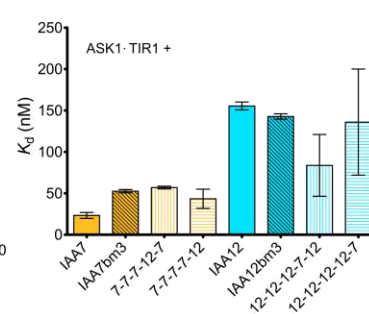

Figure 2

**a**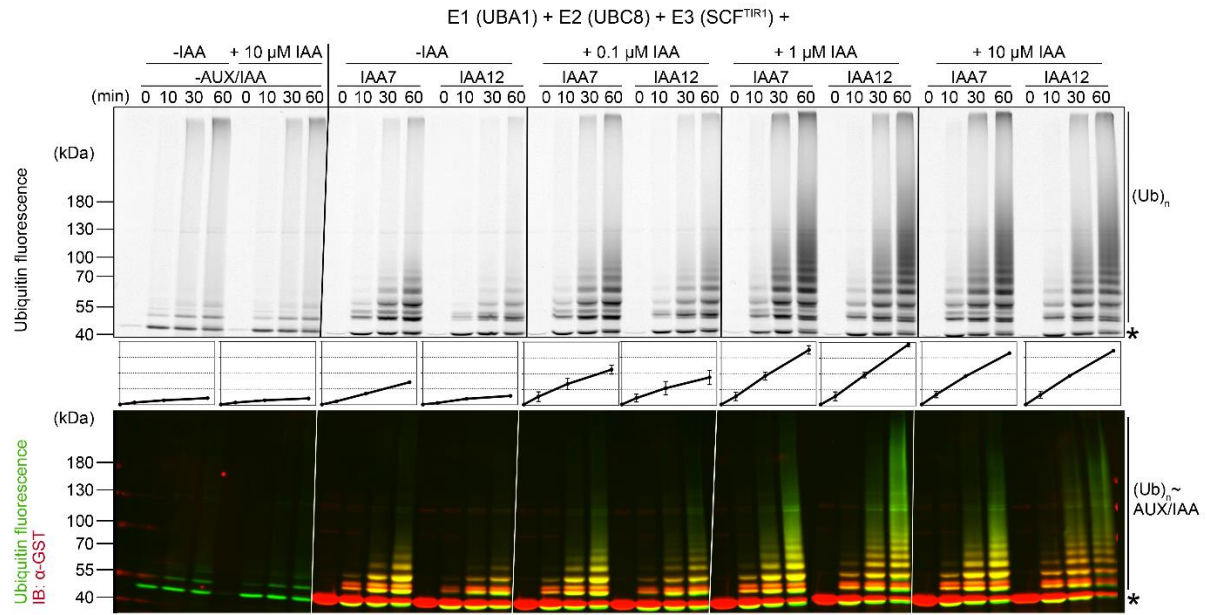**b**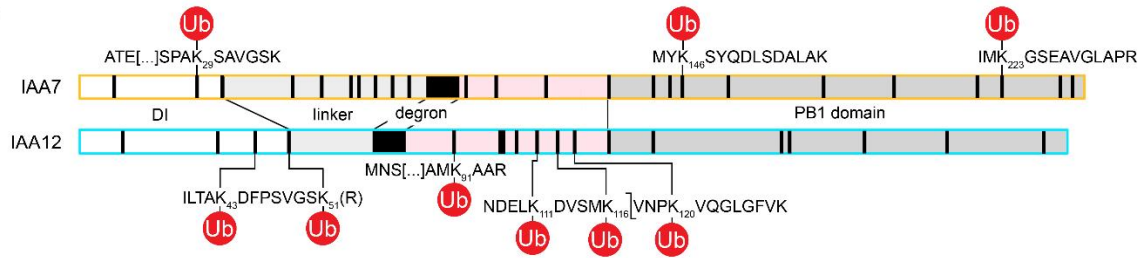**c**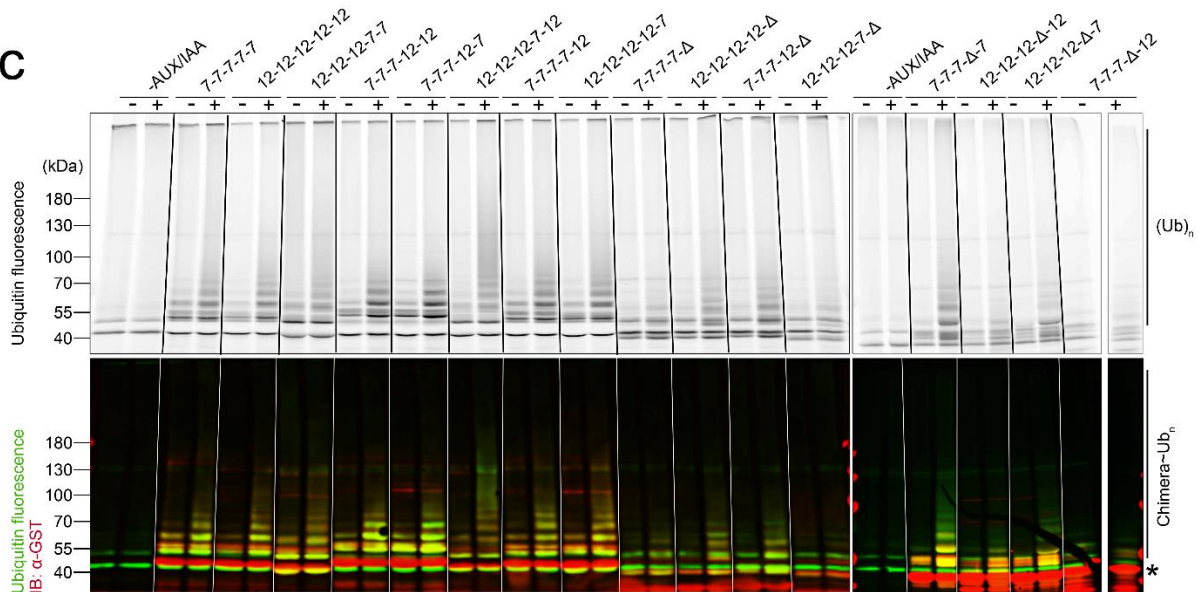

Figure 3

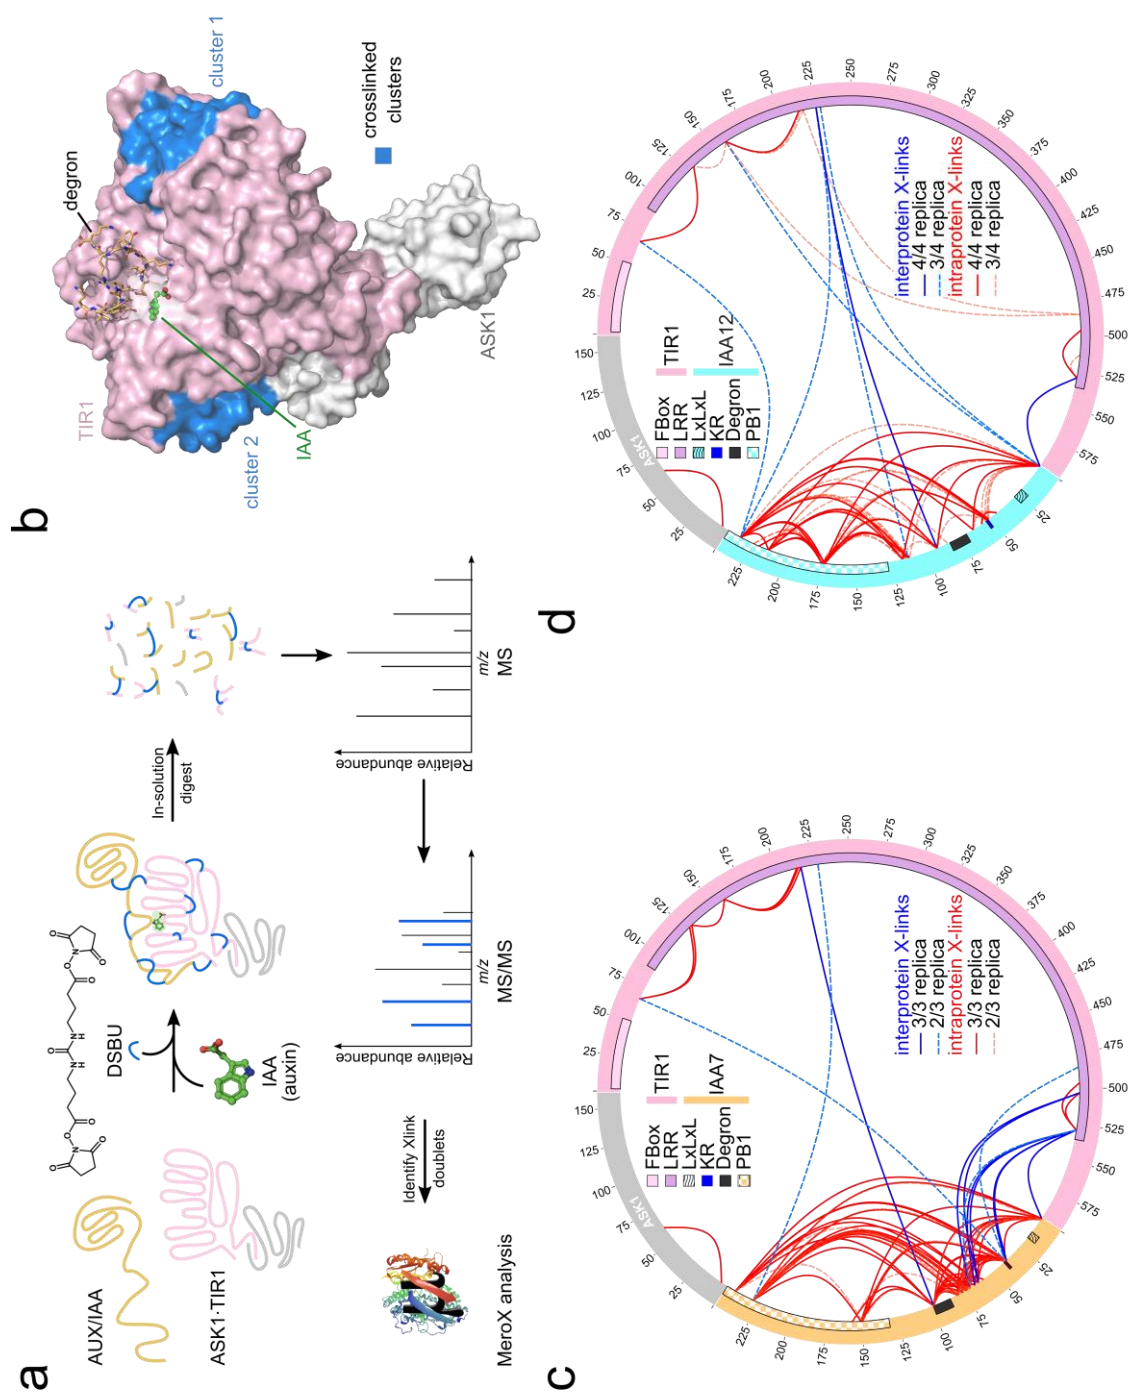

Figure 4



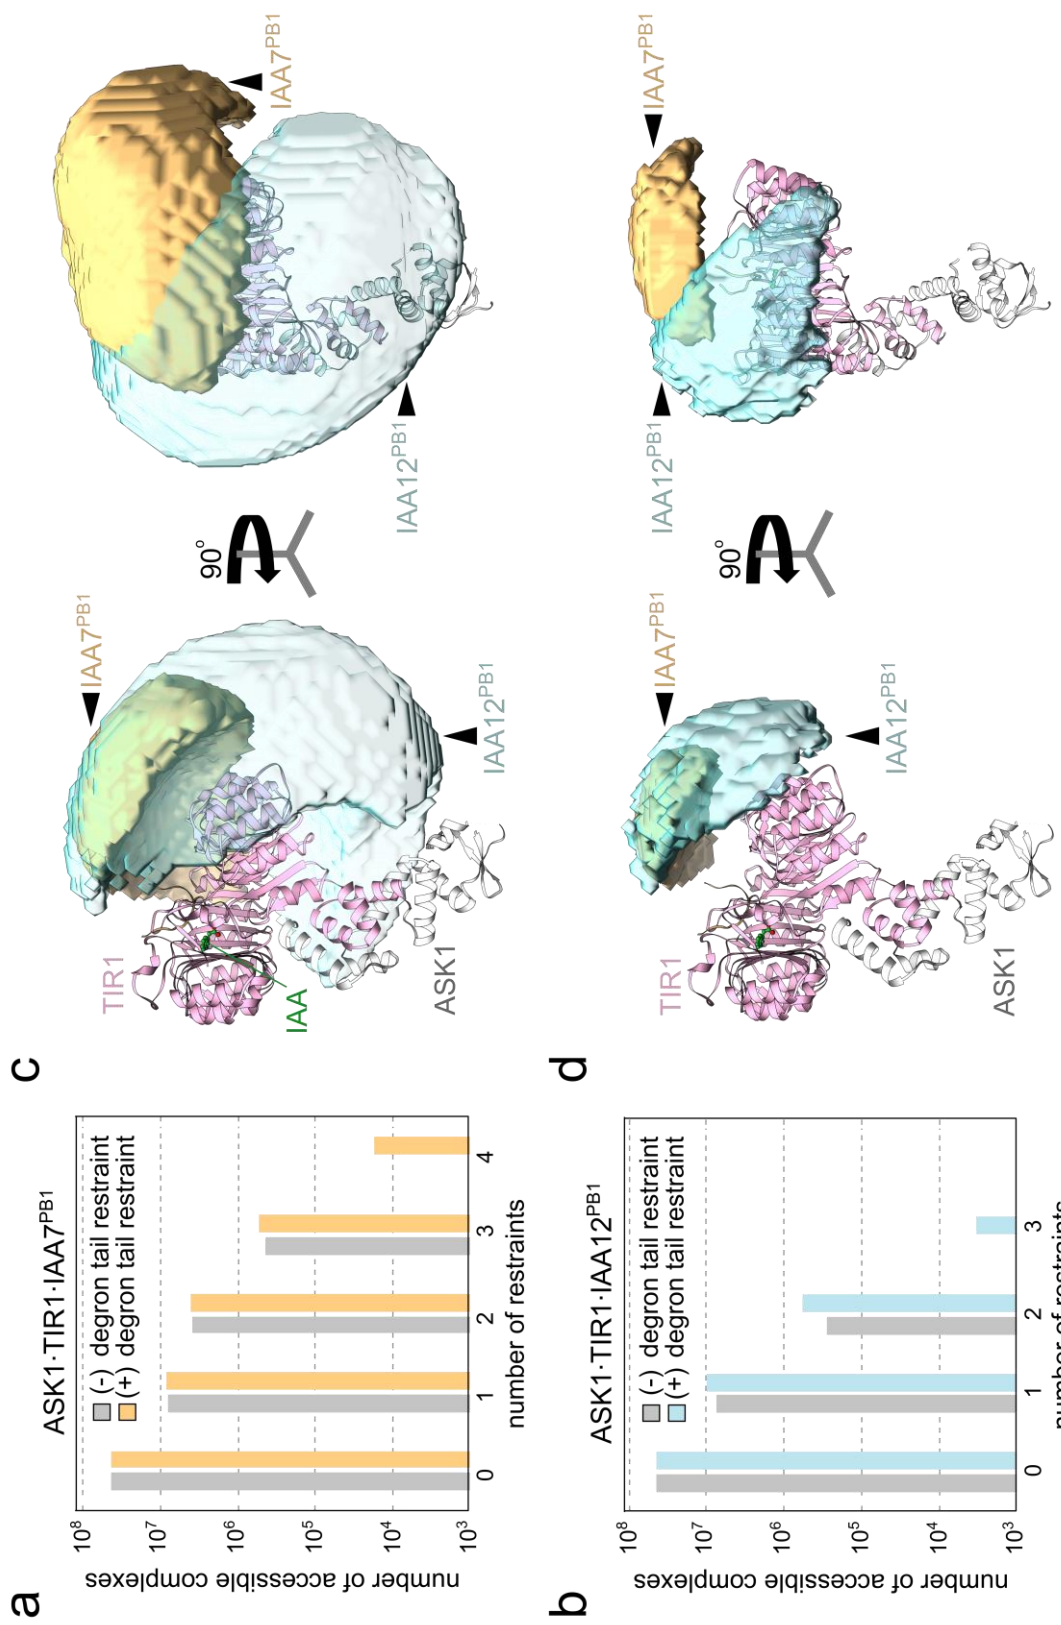

Figure 5

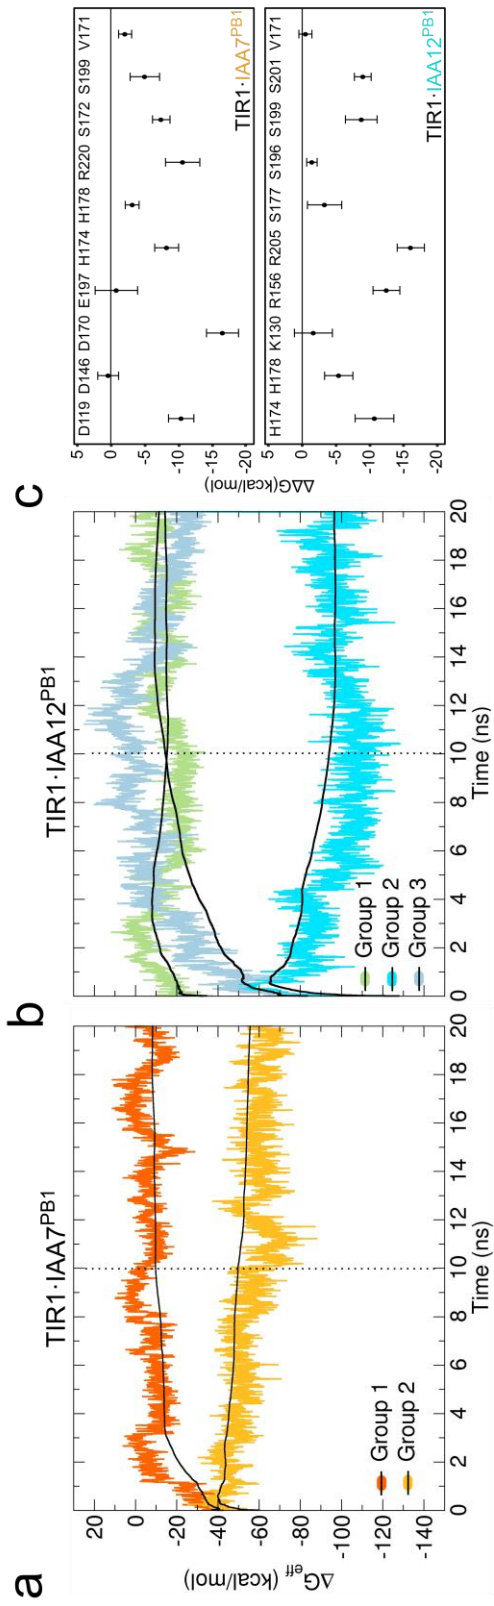

Figure 6

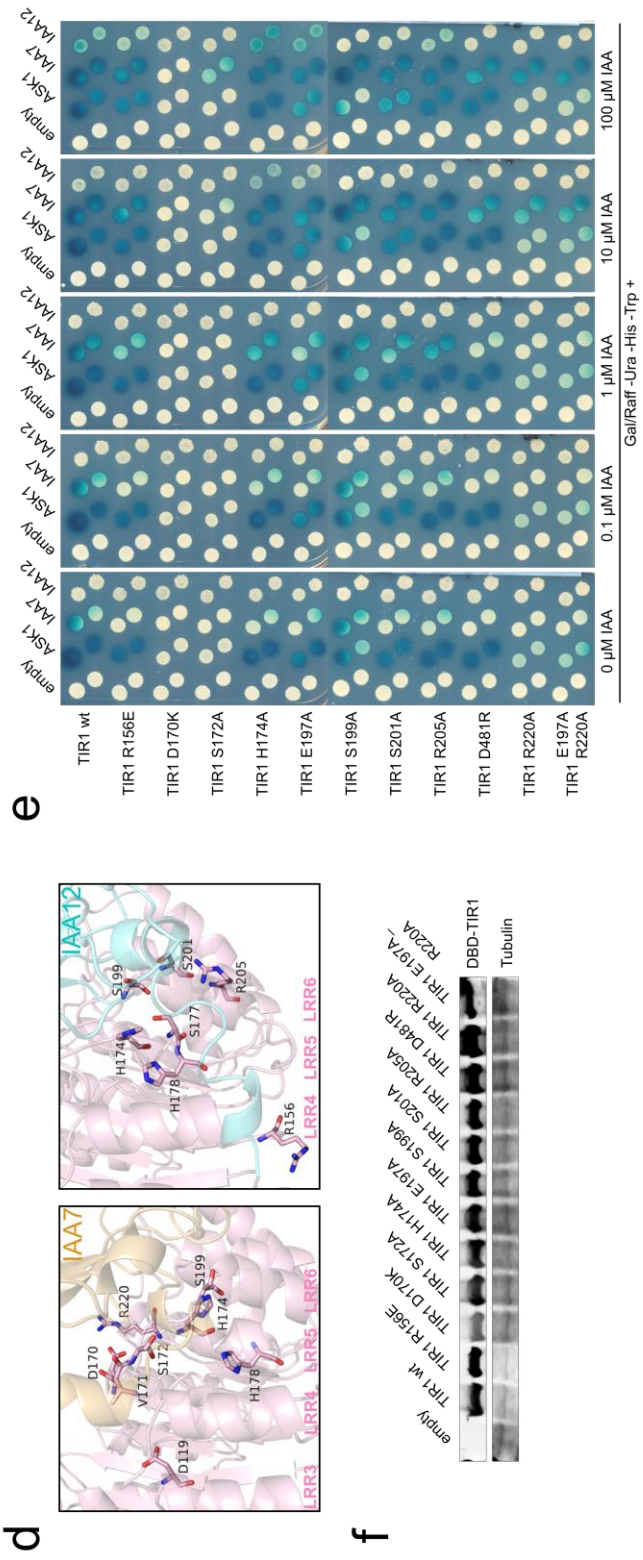

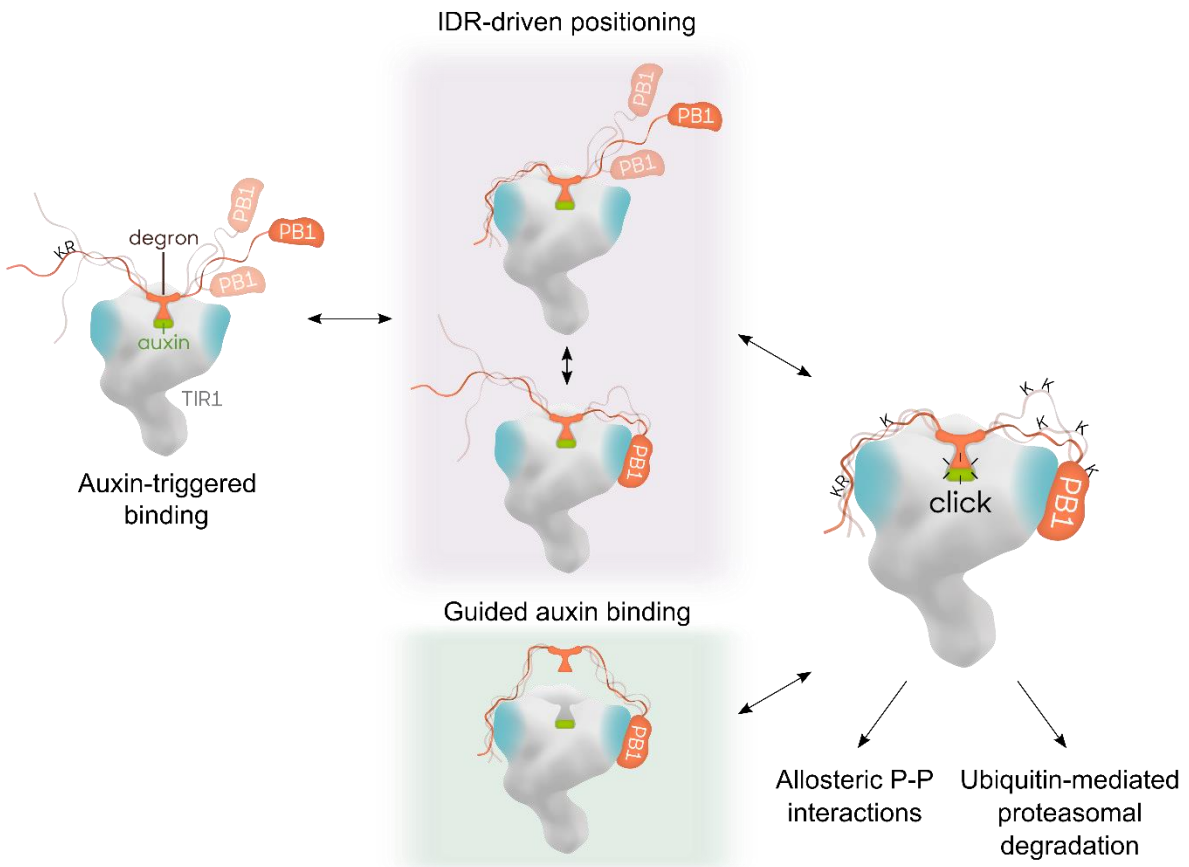

Figure 7
