# Supplementary material for: Flexibility of intrinsically disordered degrons in AUX/IAA proteins reinforces auxin co-receptor assemblies
Source: bioRxiv or medRxiv preprint supplement (doi:10.1101/787770), 2019-10-15
Supplement: Supplementary file [file media-1.pdf]

# Supp. Fig. 1

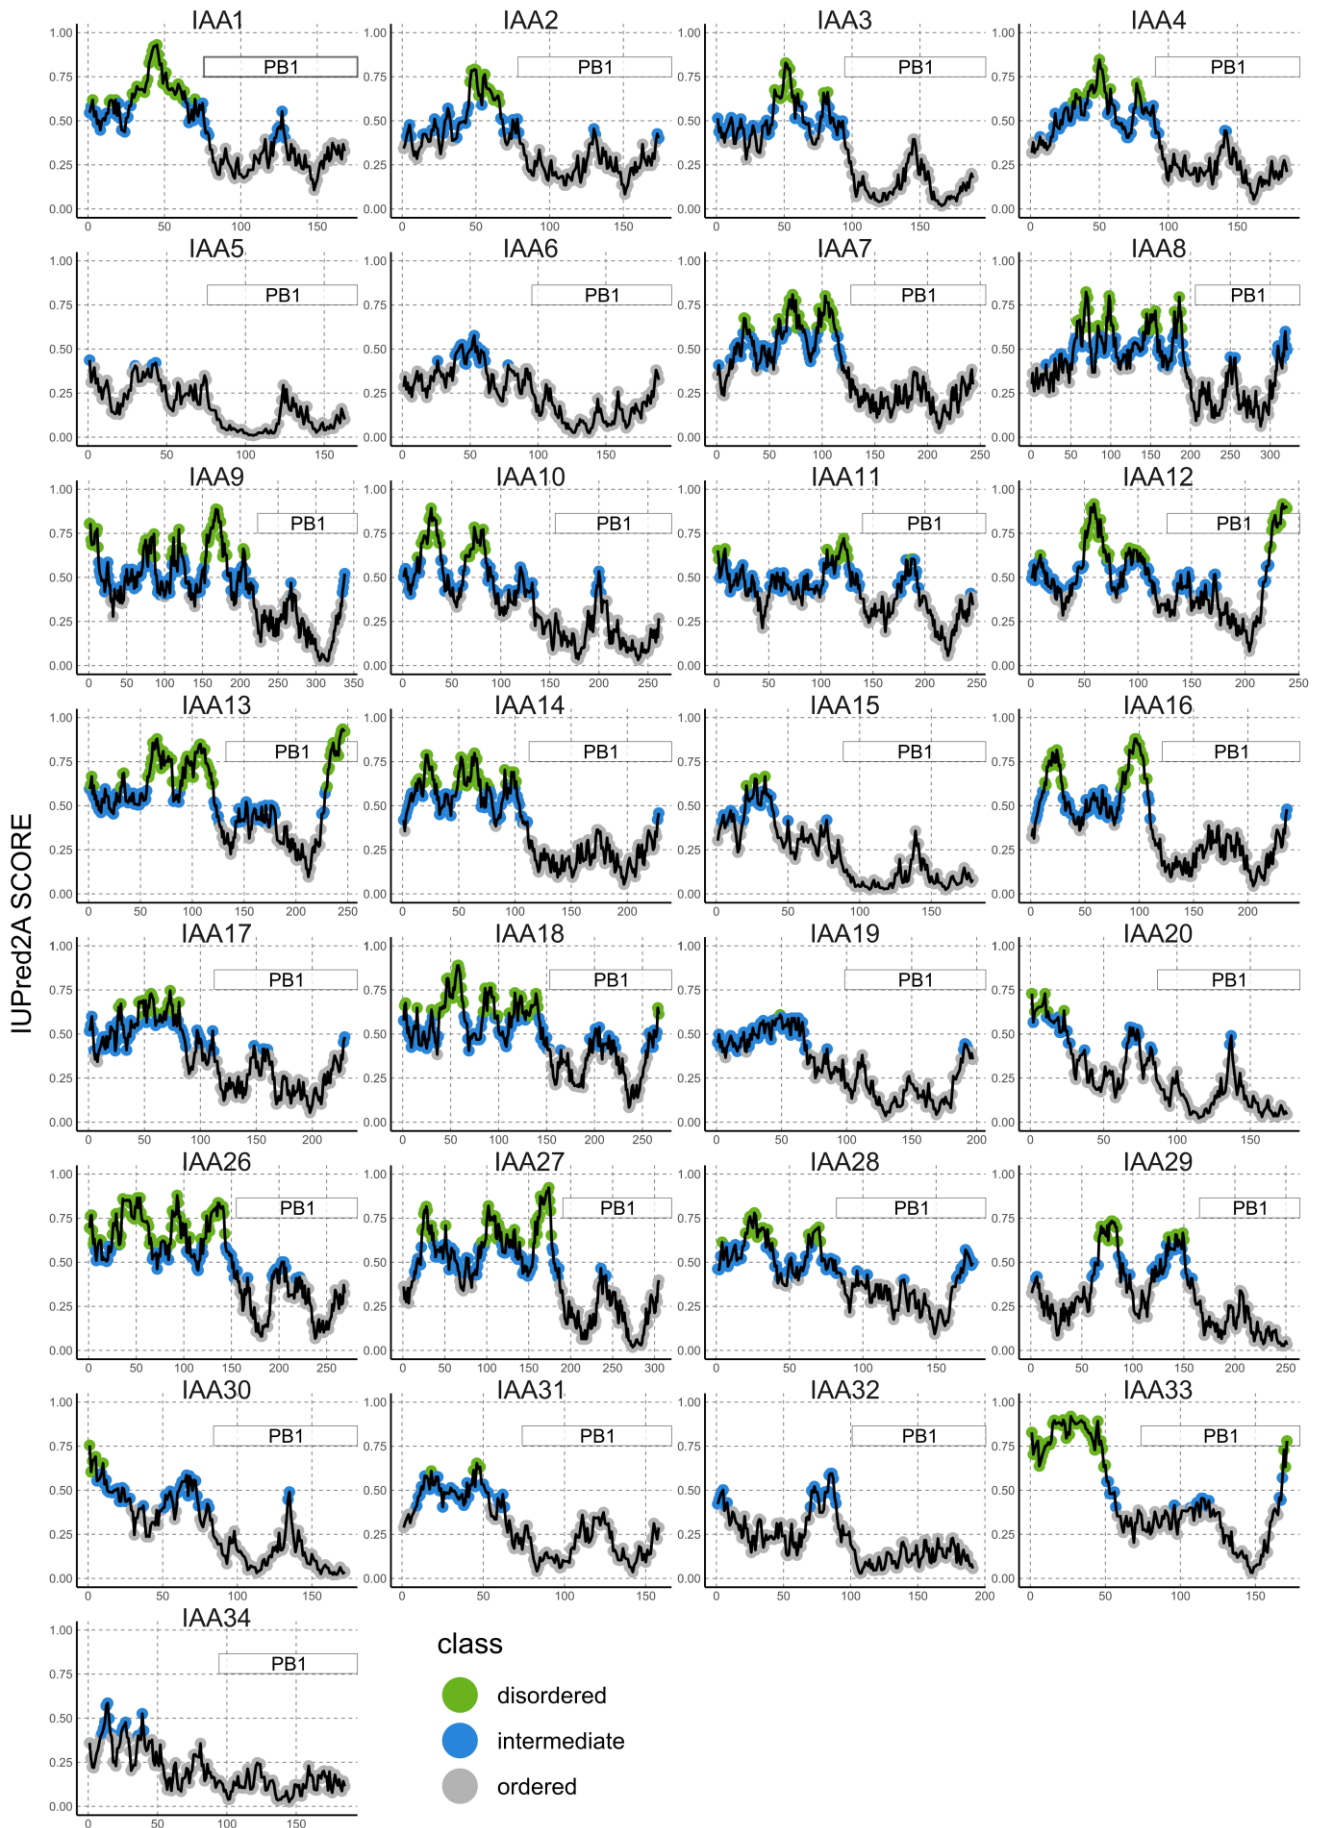

**Supplementary Figure 1 | IUPred2A disorder prediction along the sequence of *Arabidopsis thaliana* AUX/IAA proteins.** The x-axis corresponds to the full length of each AUX/IAA protein sequence, and the y-axis shows the IUPred2A score for each amino acid (probability between 0-1). Amino acid residues are colored according to their disorder probability (disordered:  $\geq 0.6$ , green; intermediate: 0.4-0.6, blue and ordered:  $\leq 0.4$ , gray). The resolved, ordered PB1 domain is located along the sequence, as indicated, starting with the conserved VKV motif.

# Supp. Fig. 2

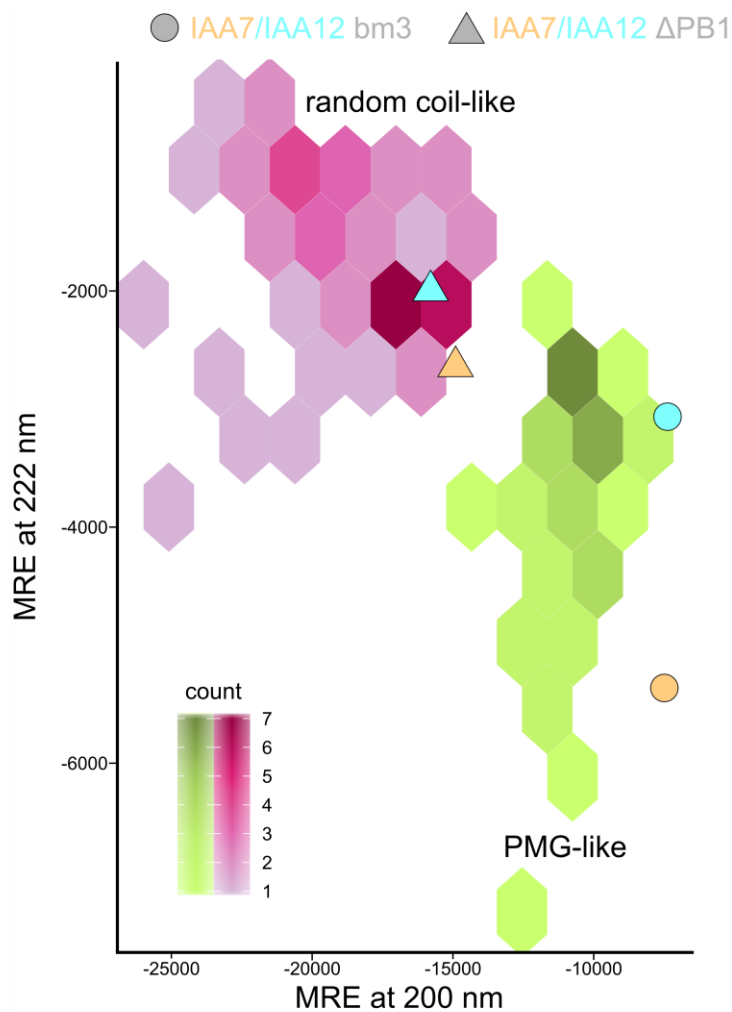

**Supplementary Figure 2| Classification of IAA7 and IAA12 variants according to their CD spectra.** CD spectral data classifies IAA7 (light orange) and IAA12 (aquamarine) as PMG-like proteins with random coil elements in their N-terminal half<sup>1-3</sup>. Molar residual ellipticity (MRE) at 200 nm and 222 nm is shown for the specified AUX/IAA protein variants on top of hexagonal binned reference proteins, with either unfolded, random coil-like proteins (purple) or premolten globule-like (PMG-like; green) proteins. Truncated versions (triangles, ΔPB1) lack the conserved folded PB1 domain. IAA7bm3 and IAA12bm3 variants (circles) carry 3 amino acid exchanges in their PB1 domain to render them oligomerization deficient.

# Supp. Fig. 3

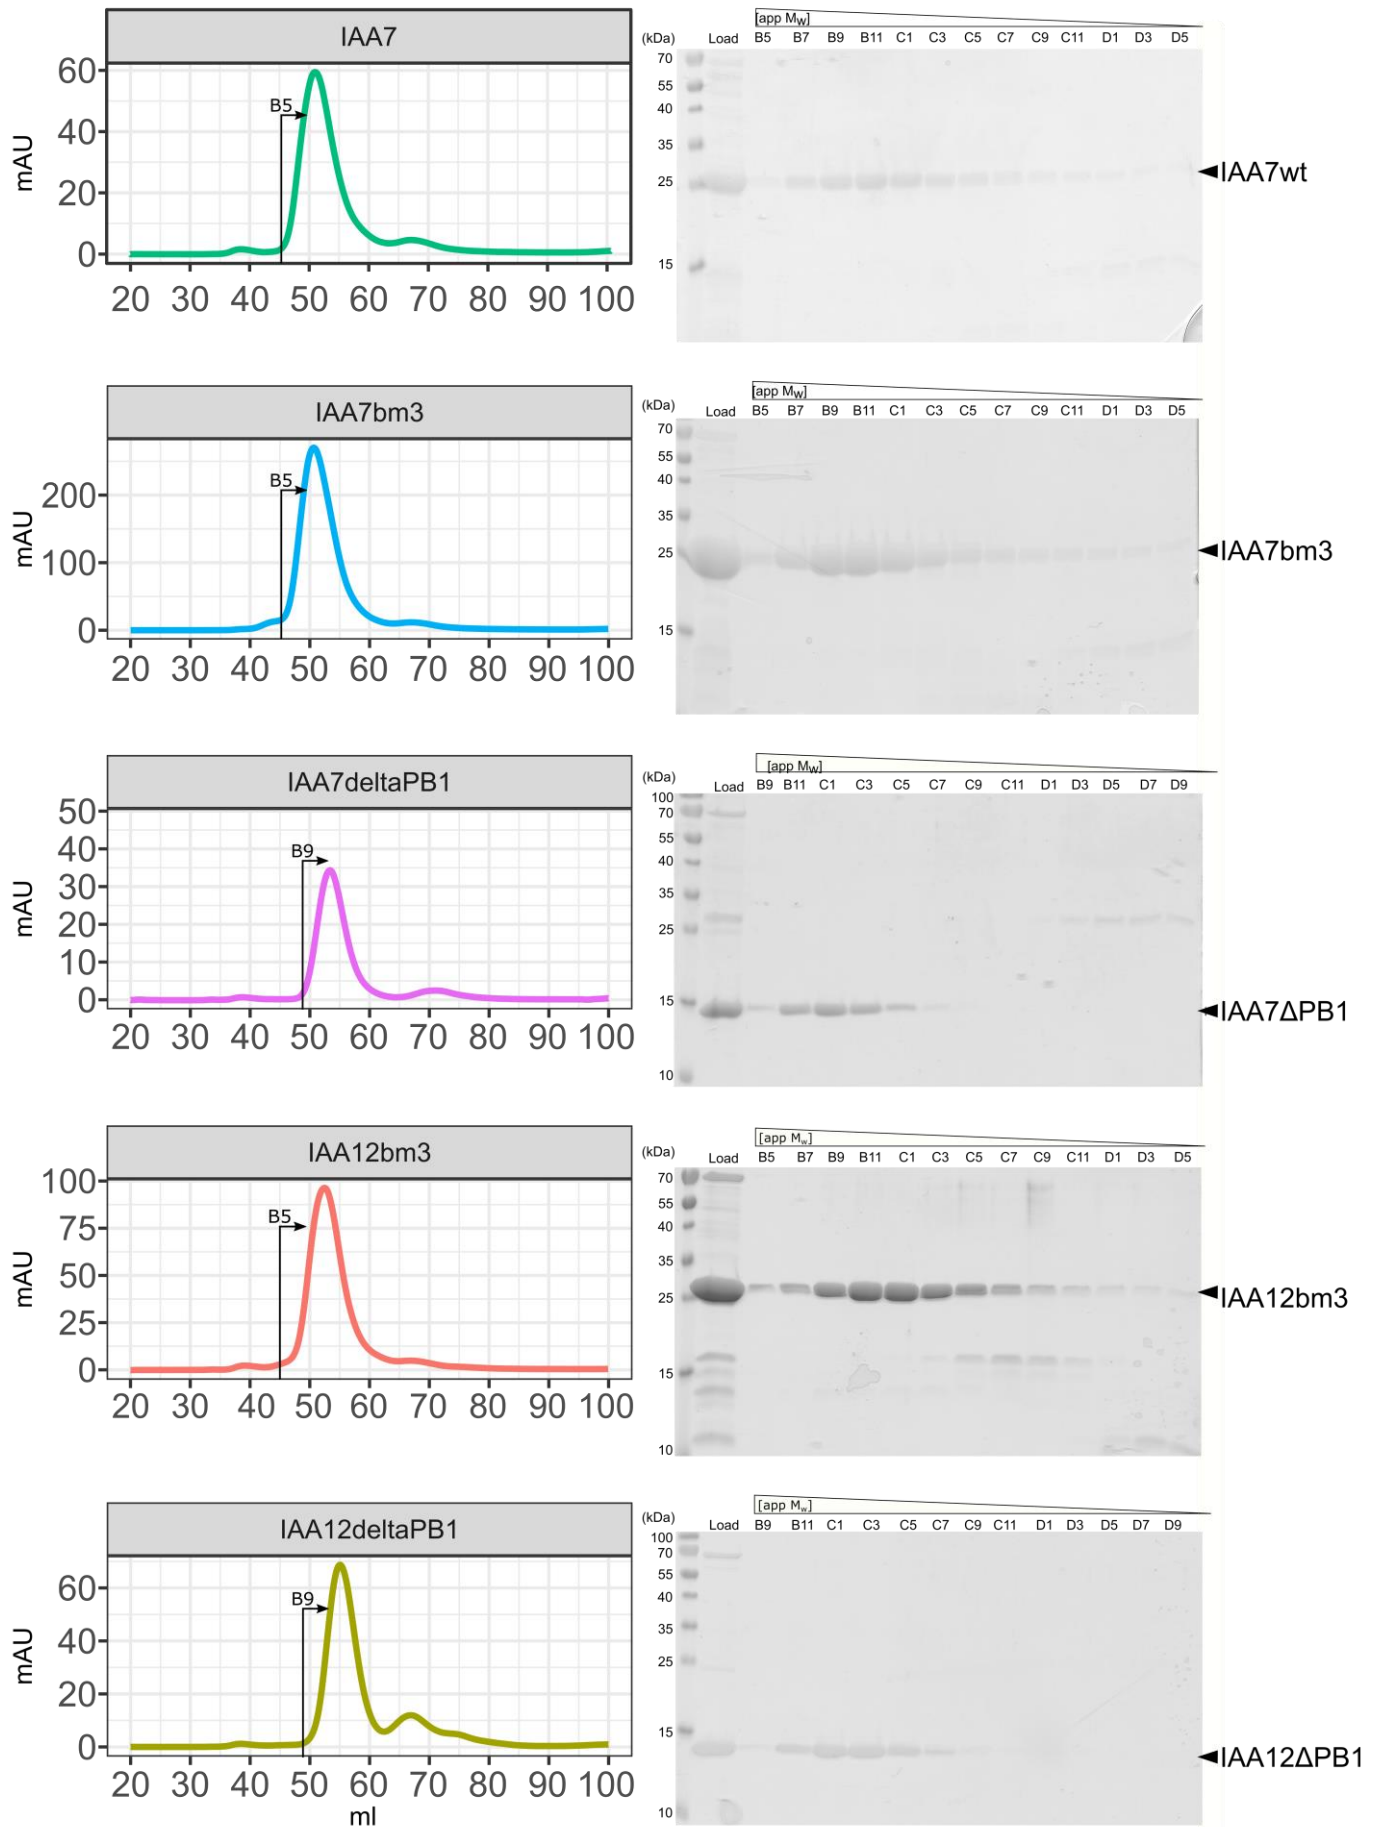

**Supplementary Figure 3| Representative size exclusion chromatography runs for the untagged AUX/IAA protein variants.** Elution profiles were obtained from semi-preparative size exclusion chromatography runs on a calibrated HiPrep 16/60 Sephacryl S100 High Resolution column (left panels). Indicated is the first fraction analyzed by SDS-PAGE shown in the right panels. Impurities could be separated from the protein of interest (indicated).

# Supp. Fig. 4

**a**

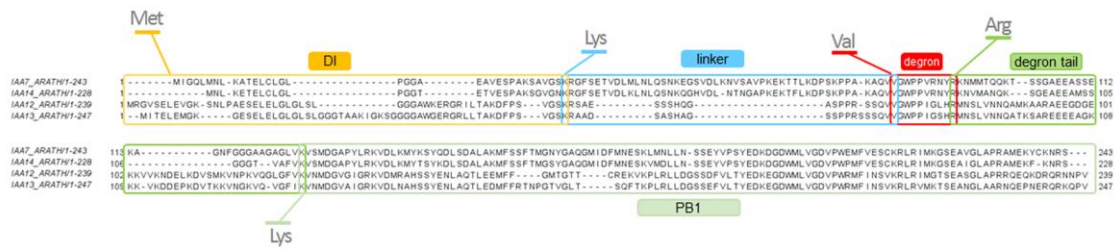

**b**

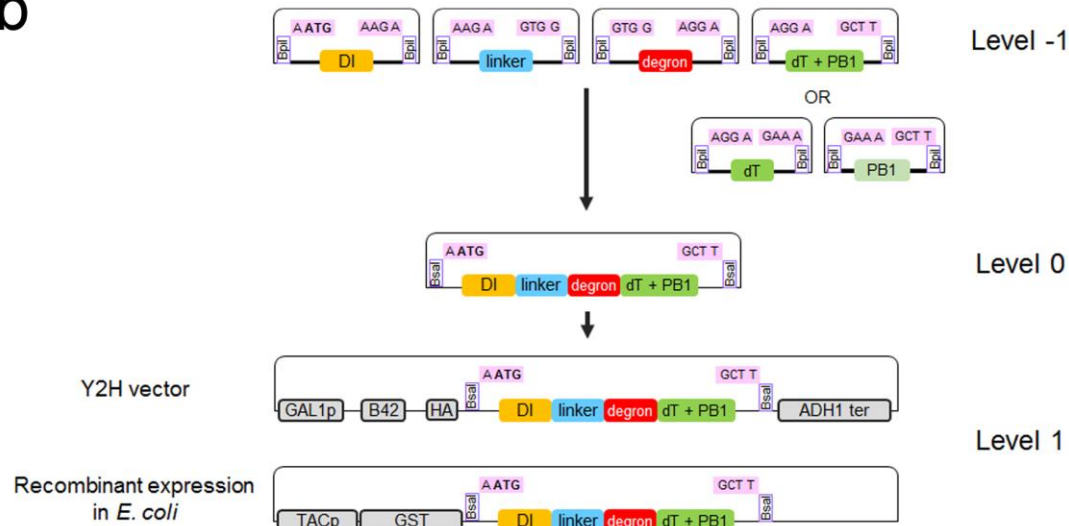

**c**

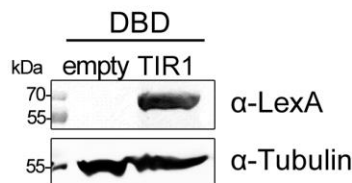

**d**

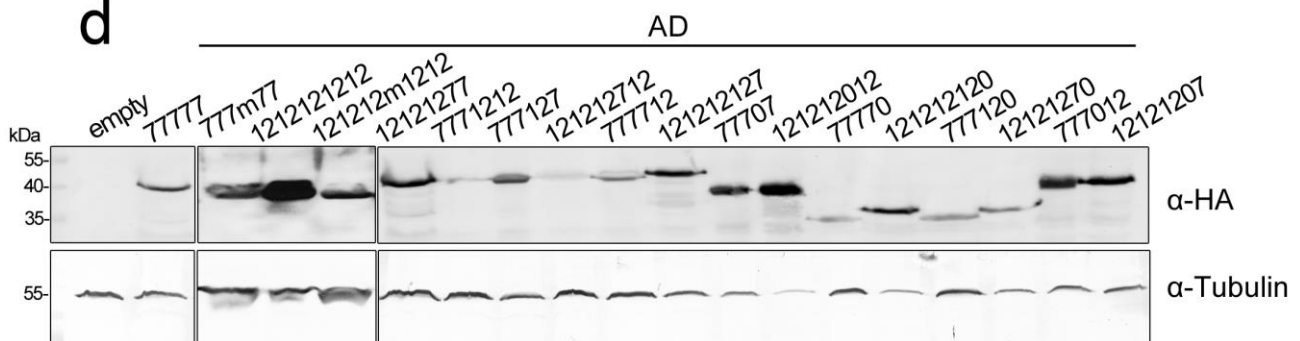

**Supplementary Figure 4 | Design principle for 4- and 5-module AUX/IAA chimeras.** **a**, Sequence alignment of IAA7, IAA14, IAA12, IAA13 from *Arabidopsis thaliana* showing conserved amino acid residues selected as start and end of each module: DI (orange), linker (blue), core degron (red), degron tail (dark green) and the PB1 domain (light green). Conserved amino acids used as Golden Gate assembly sites are highlighted. **b**, Golden Gate cloning strategy to assemble level -1, 0, and 1 constructs for either yeast-two hybrid assays or recombinant *E. coli* expression as GST-fusion proteins using *Bpi*I and *Bsa*I restriction enzymes. **c-d**, Immunoblots for LexA-DBD-tagged TIR1 (**c**) and HA-tagged AUX/IAA chimeras (**d**) from haploid yeast cells grown in Gal/Raff -Trp or Gal/Raff -Ura -His medium, respectively. Detection was carried out using anti-LexA, anti-HA (F7), and anti-tubulin (loading control) antibodies.

# Supp. Fig. 5

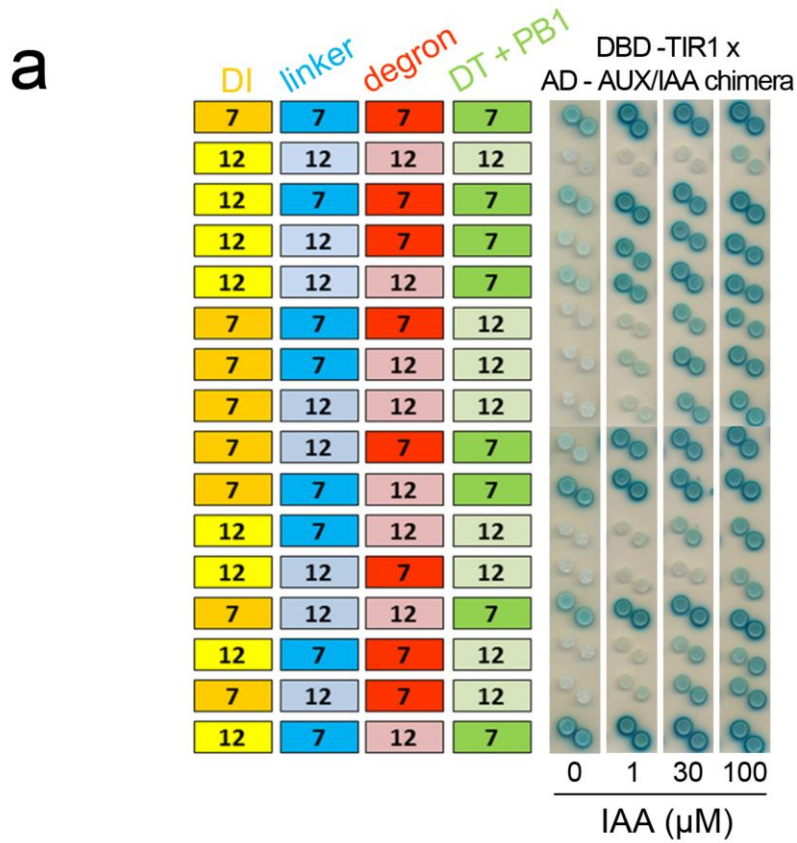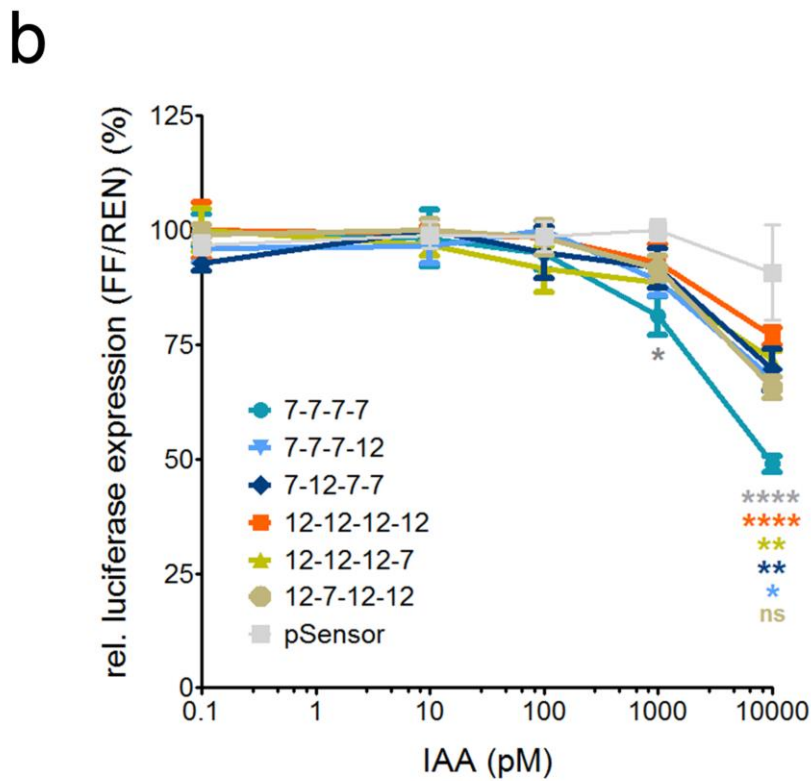

**Supplementary Figure 5 | Design of 4-module chimeras, where module 4 consists of the degron tail and the PB1 domain of IAA7 or IAA12 combined.** **a**, Yeast two hybrid assay shows auxin-dependent interaction of TIR1 and chimeric AUX/IAAs is strongly driven by the presence of the IAA7 degron tail, and the PB1 domain -containing module. **b**, Ratiometric luminescent biosensor<sup>4</sup> to track degradation of 4-module AUX/IAA chimeric proteins in *Arabidopsis* protoplasts.

# Supp. Fig. 6

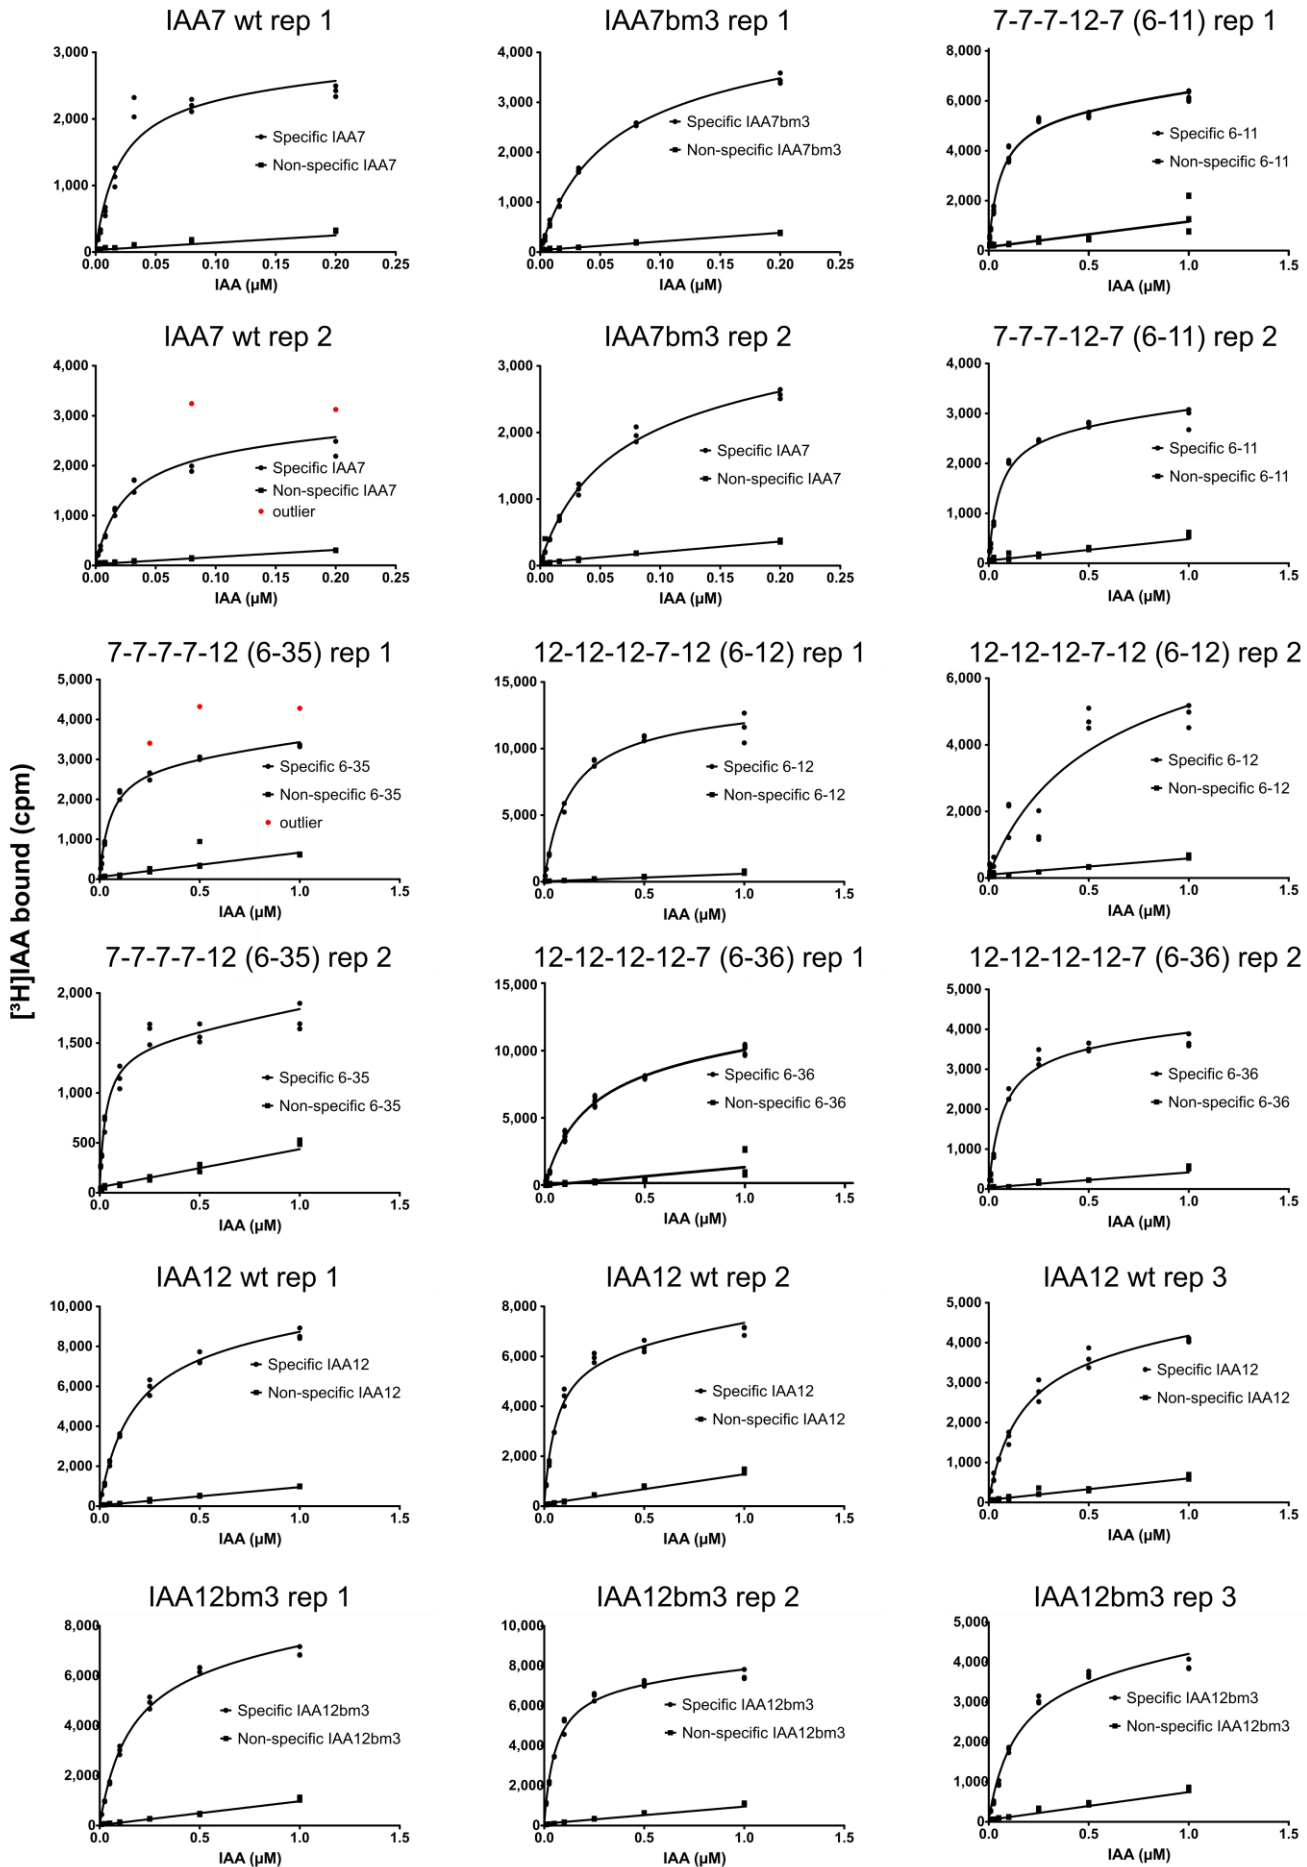

**Supplementary Figure 6| Single non-normalized  $[^3\text{H}]$  IAA radioligand binding curves.** Single binding curves for each AUX/IAA variant and chimeric construct. Datapoints of each  $[^3\text{H}]$  IAA concentration are shown as individual points for each technical replica (circles) together with non-specific binding in the presence of 2 mM cold IAA (squares). If present, outliers are marked in red.

# Supp. Fig. 7

a

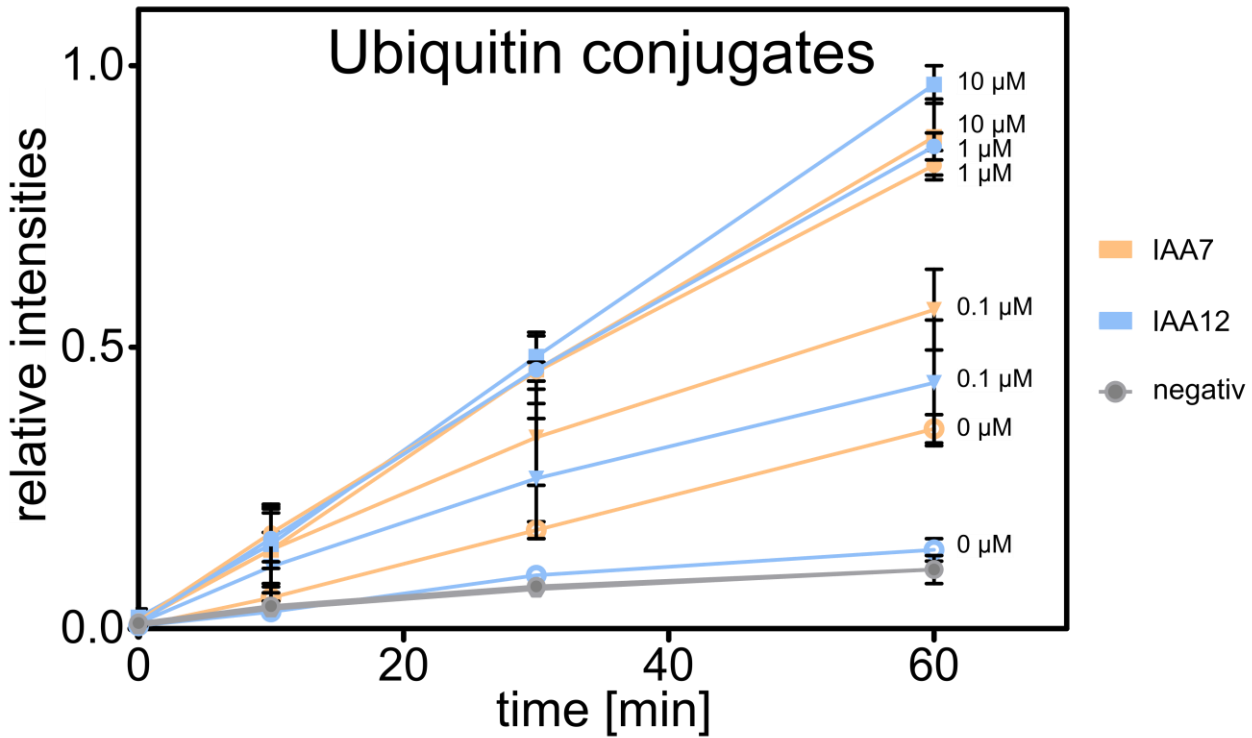

b

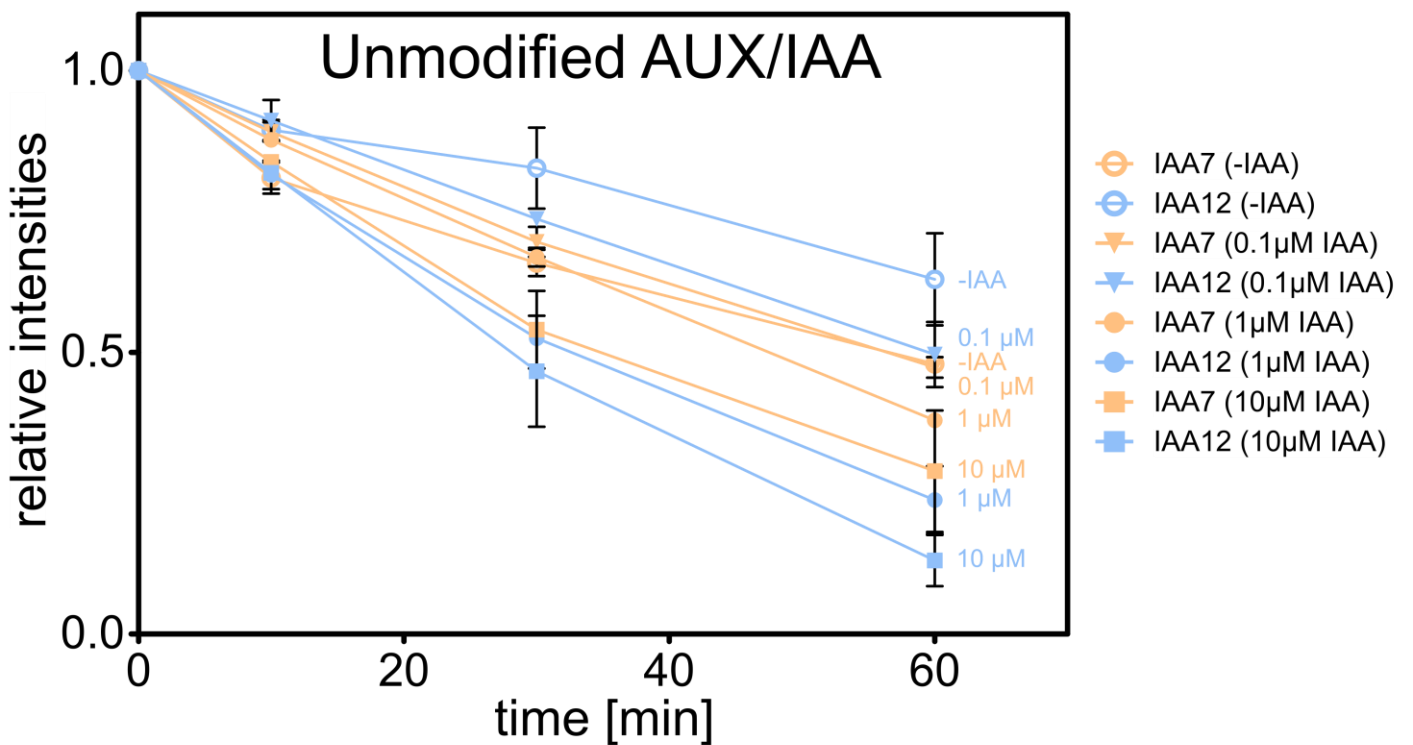

**Supplementary Figure 7 | Quantification of auxin- and time-dependent ubiquitylation of IAA7 and IAA12.** **a**, Increase in ubiquitin conjugates over time measured as the in-gel ubiquitin-fluorescein signal intensity above the ubiquitin-modified Cullin1 (asterisk, **Figure 3a**). Signal was normalized by the strongest signal (IAA12, 10 μM IAA). **b**, Decrease of unmodified GST-AUX/IAA protein signal after immunoblotting detected by an Alexa Fluor Plus 647-coupled secondary antibody. Signals were normalized to the intensities at time point "0". Depicted are mean values from three independent experiments with standard deviation as error bars. Results for GST-IAA7 and GST-IAA12 are depicted in light orange and light blue, respectively.

# Supp. Fig. 8

**a**

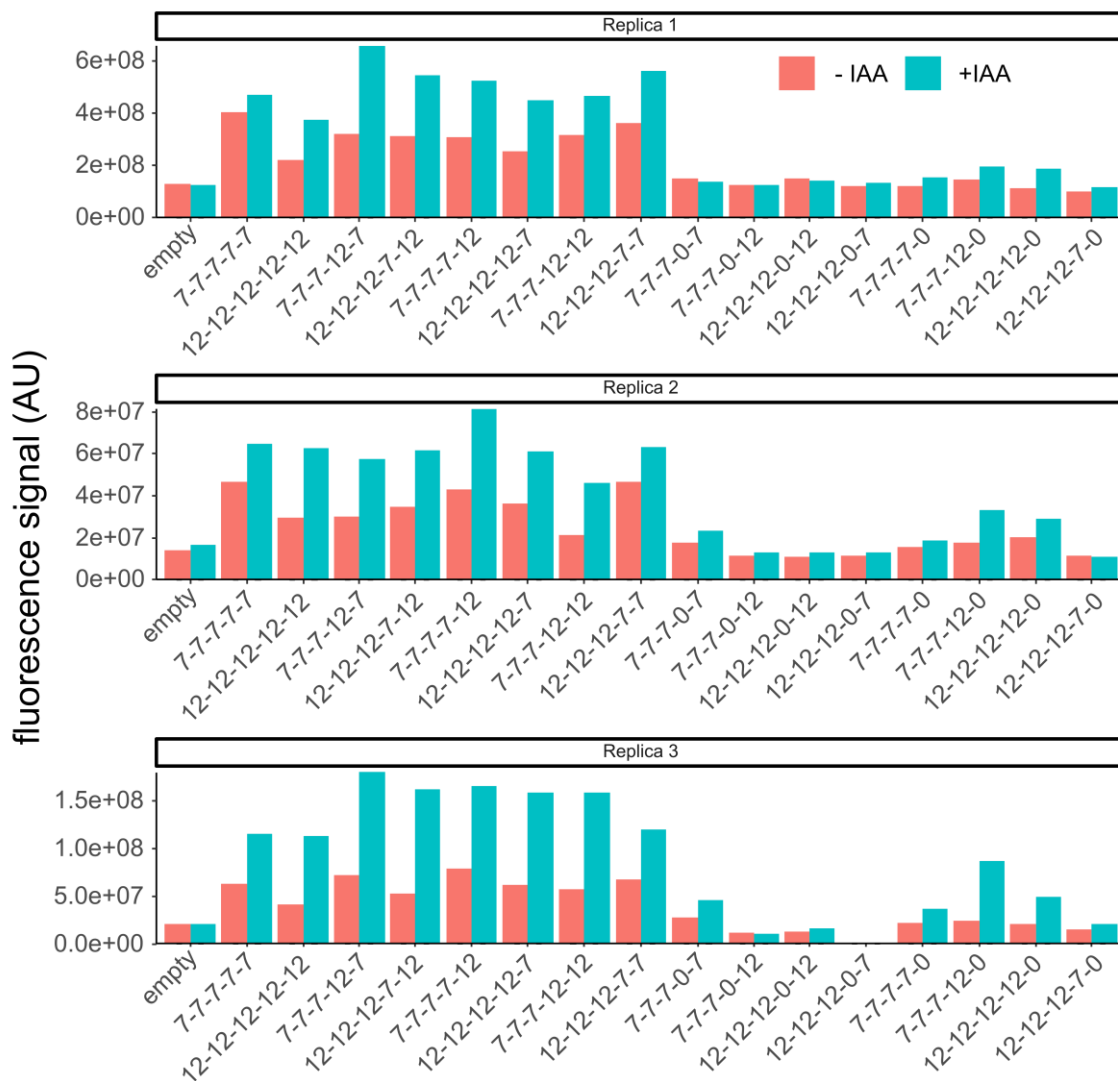

**b**

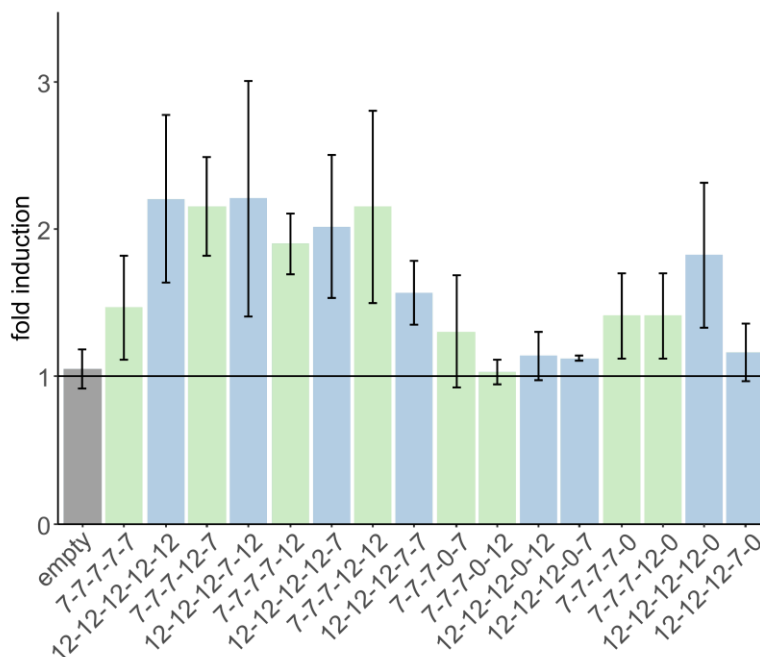

**Supplementary Figure 8 | Quantification of auxin-triggered chimera ubiquitylation.** As in Supplemental Figure 6 ubiquitin conjugates on chimeric AUX/IAAs were measured via fluorescein signal intensities in the presence (teal) or absence (salmon) of auxin (IAA) after 1 h reaction time. **a**, Raw signal intensities for each individual replica. **b**, Auxin-triggered fold induction of chimera ubiquitylation as mean values with standard deviation using data from **a**. Chimeras consisting mainly of IAA7 (pale green) or IAA12 (light blue) modules are displayed.



# Supp. Fig. 9

a

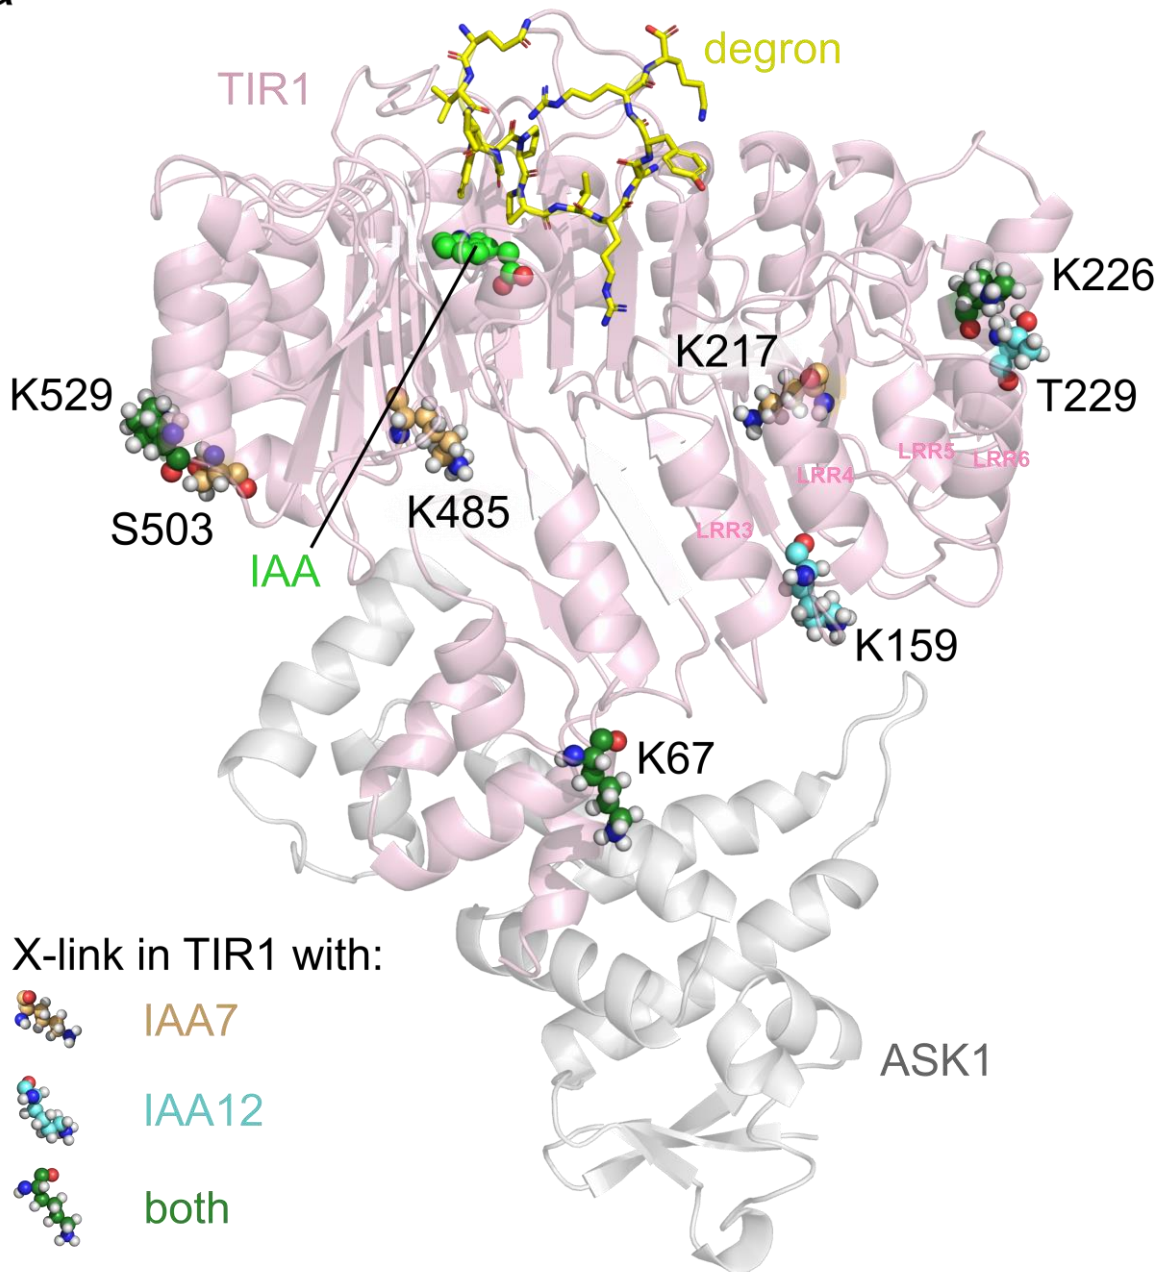

b

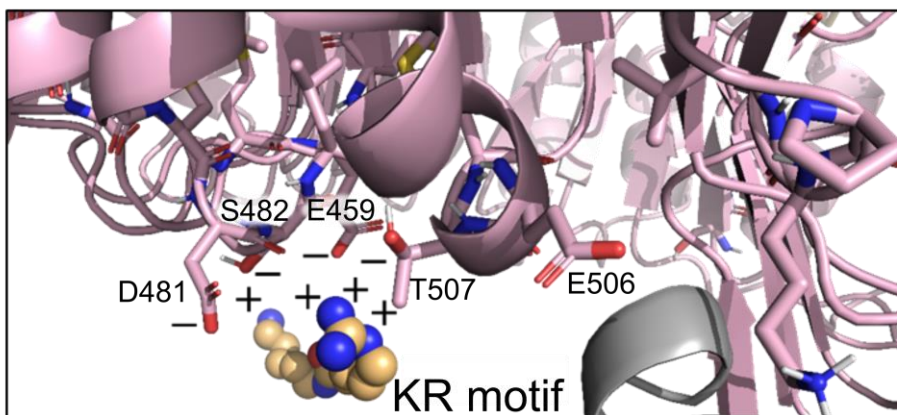

**Supplementary Figure 9| Crosslinked residues in TIR1 either with IAA7, IAA12 or both.** **a**, Depicted is the crystal structure of ASK1-TIR1-auxin-IAA7 degron (2P1Q, gray, light pink) with highlighted residues found to be crosslinked with either IAA7 (light orange), IAA12 (aquamarine) or both (green) shown as spheres. Leucine-rich repeats carrying PB1 domain-interacting are labeled. **b**, Patch enriched with negative charge potential, close to KR motif-cross-linked residues, acting as a plausible interaction site.

# Supp. Fig. 10

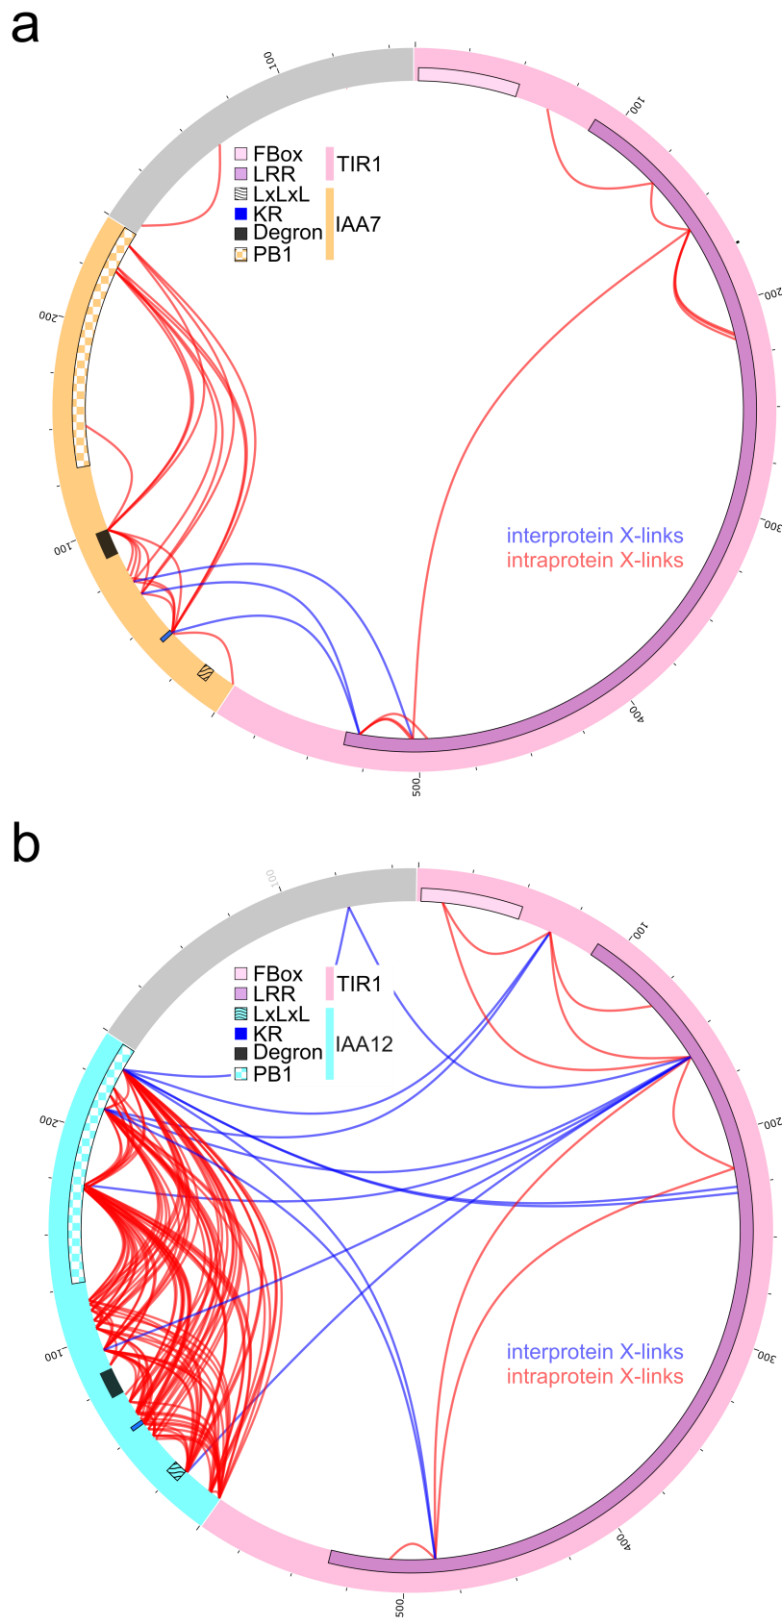

**Supplementary Figure 10| Crosslinks identified in ASK1-TIR1 and AUX/IAAs in the absence of auxin.** Displayed are all crosslinks within (intra-protein, red) or in between (inter-protein, blue) ASK1 (gray), TIR1 (light pink) and IAA7 (light orange, **a**) or IAA12 (aquamarine, **b**) as connecting lines along the circular depicted amino acid sequence. Lines correspond to all crosslinked peptides collected from multiple replica.

Supp. Fig. 11

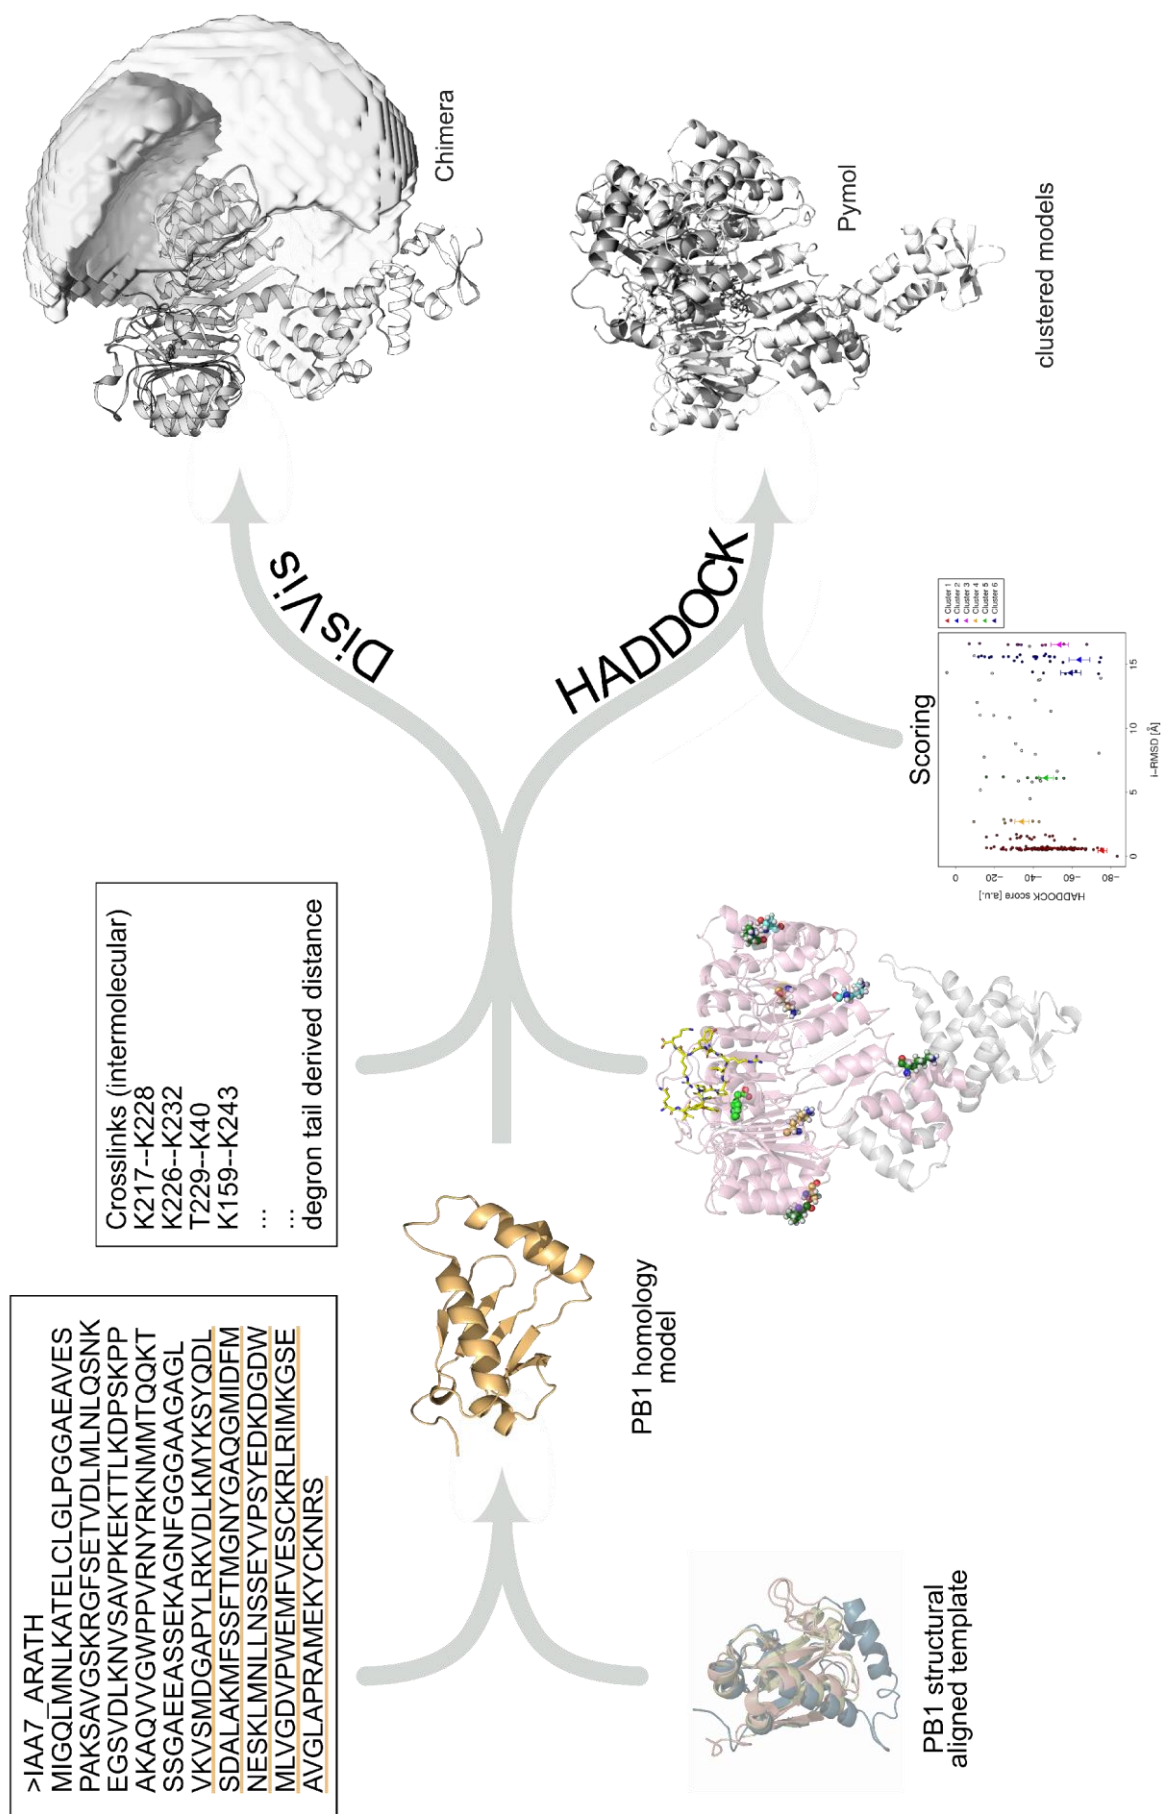

**Supplementary Figure 11 | Workflow for cross-linking-based docking using HADDOCK.** Homology models from AtAA7 and IAA12 PB1 domains were created using multi-template-based comparative modelling with MODELLER. Docking models using HADDOCK were generated by docking the PB1 homology models on the modified ASK1·TIR1·auxin-degron crystal structure (2P1Q) using as distant restraints the cross-linking information and the degron tail length. Potential conformational space was visualized via DisVis.

# Supp. Fig. 12

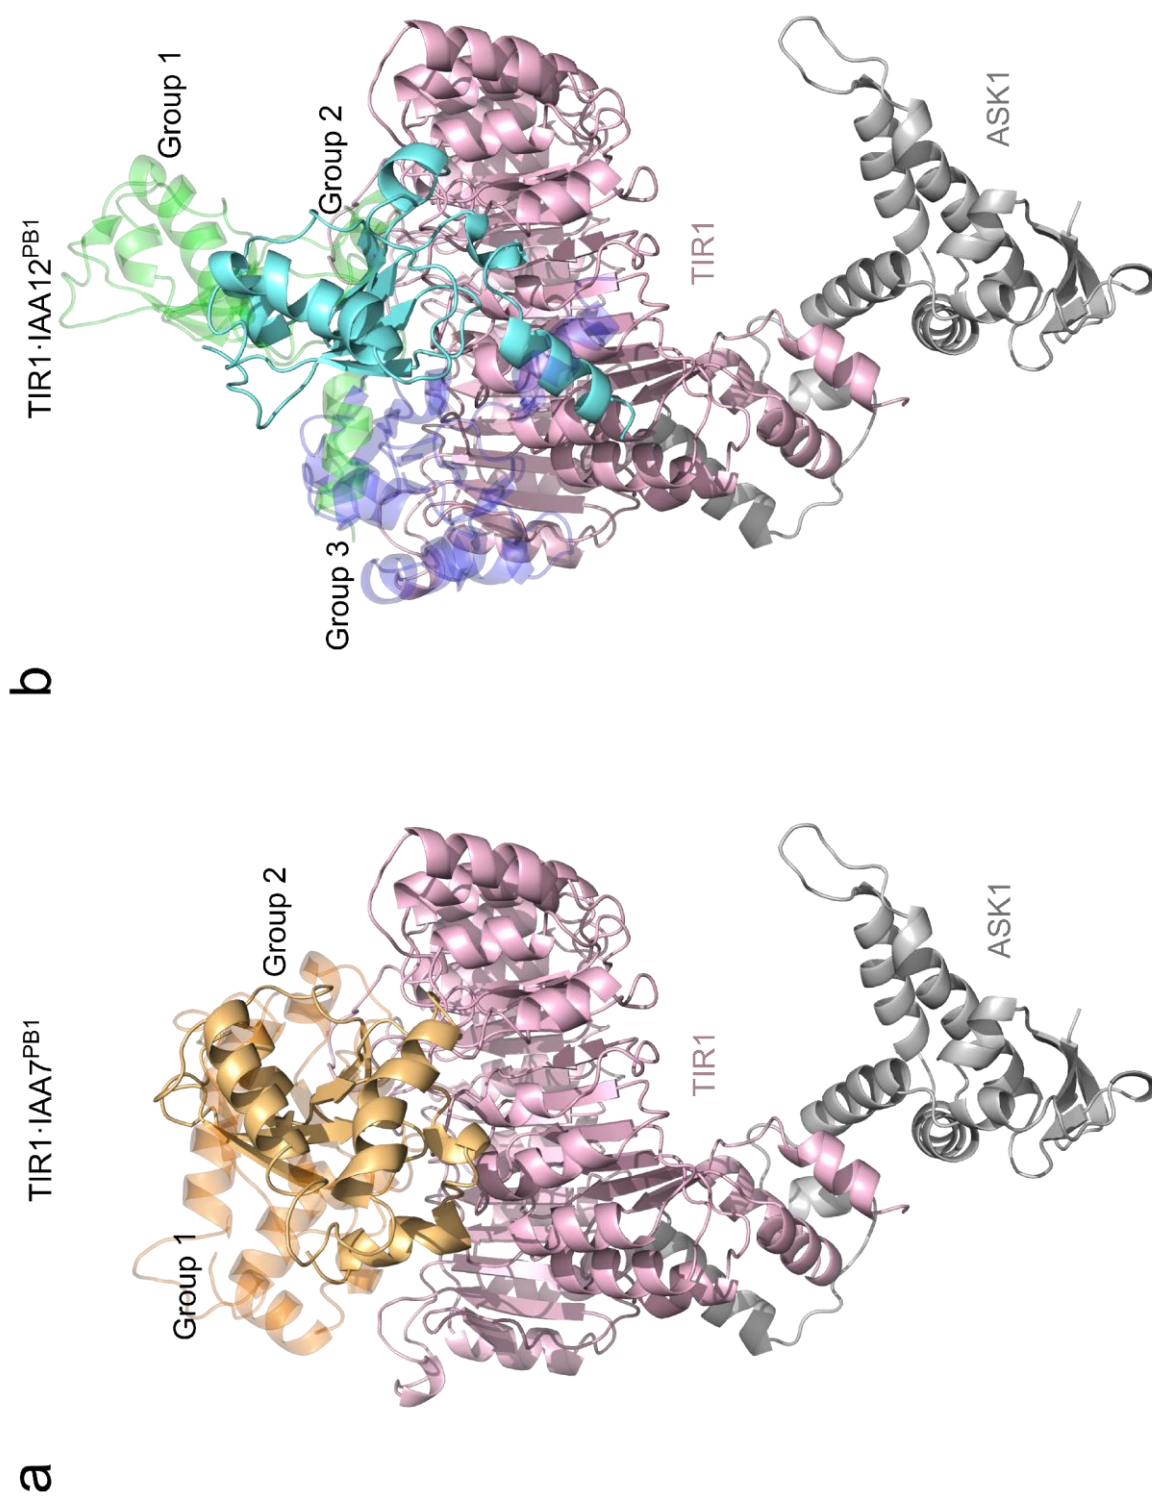

**Supplementary Figure 12| HADDOCK docking using crosslinking data restrictions generated structural models of TIR1·AUX/IAA PB1 complexes. A representative structure for each group of TIR1·IAA7 PB1 (a) (group 1 (dark orange), group 2 (light orange)); and TIR1·IAA12 PB1 (b) (group 1 (green), group 2 (aquamarine), group 3 (dark blue)) HADDOCK models are shown.**

# Supp. Fig.13

a

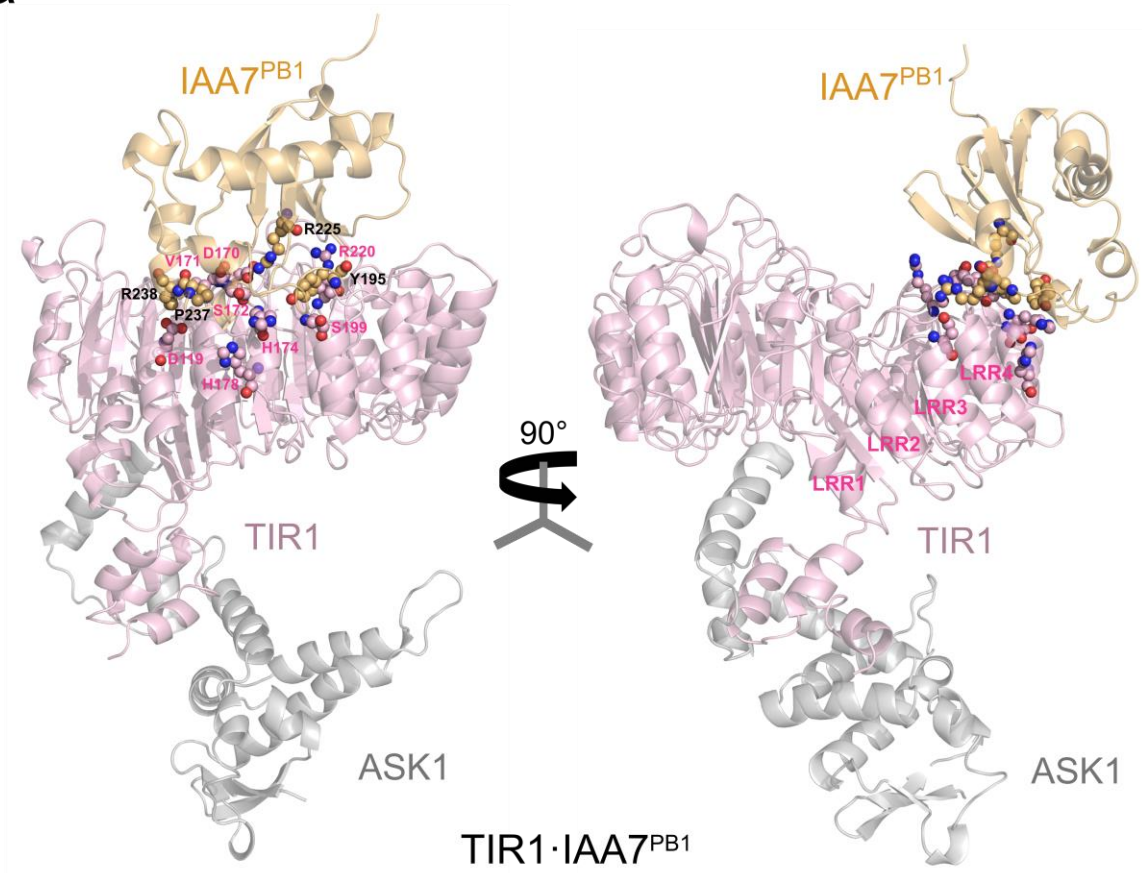

b

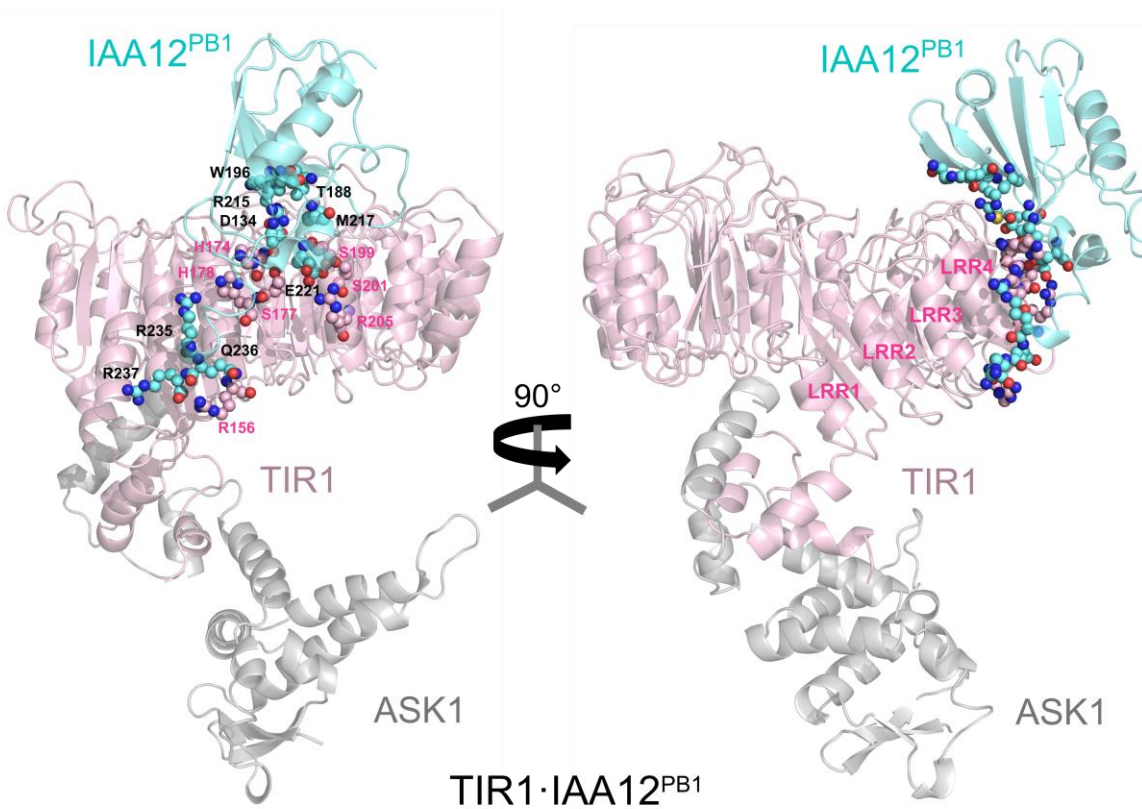

**Supplementary Figure 13| Molecular dynamics (MD) simulations revealed the most energetically favorable model from HADDOCK-based docking. a-b,** PB1 domains from both IAA7 and IAA12 are positioned over TIR1 interacting with residues from leucine-rich-repeat 3-6 (LRR3-6). Energetically relevant residues (small spheres) from TIR1 (light pink), IAA7 PB1 (light orange), and IAA12 PB1 (aquamarine) domains for complex stabilization are located in the TIR1·AUX/IAA PB1 interface.

# Supp. Fig. 14

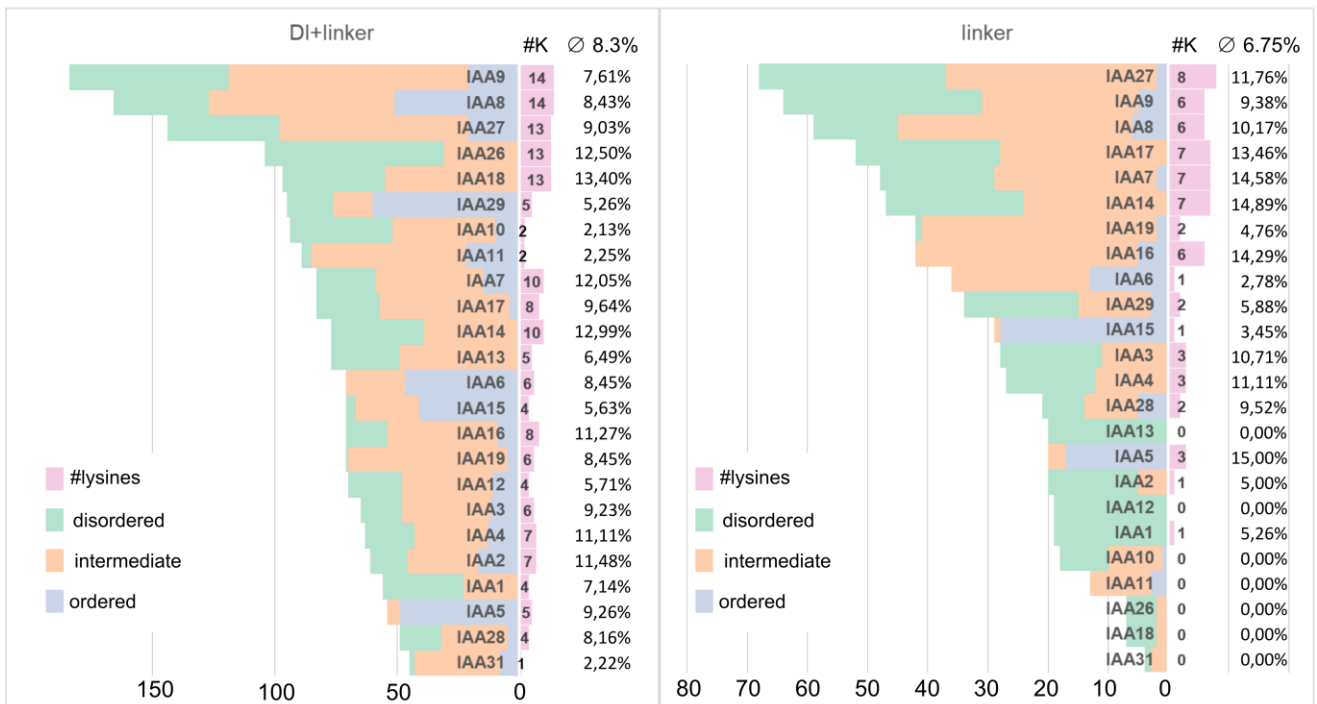

--- VGWPP-[V]-[RG]-x(2)-R ---

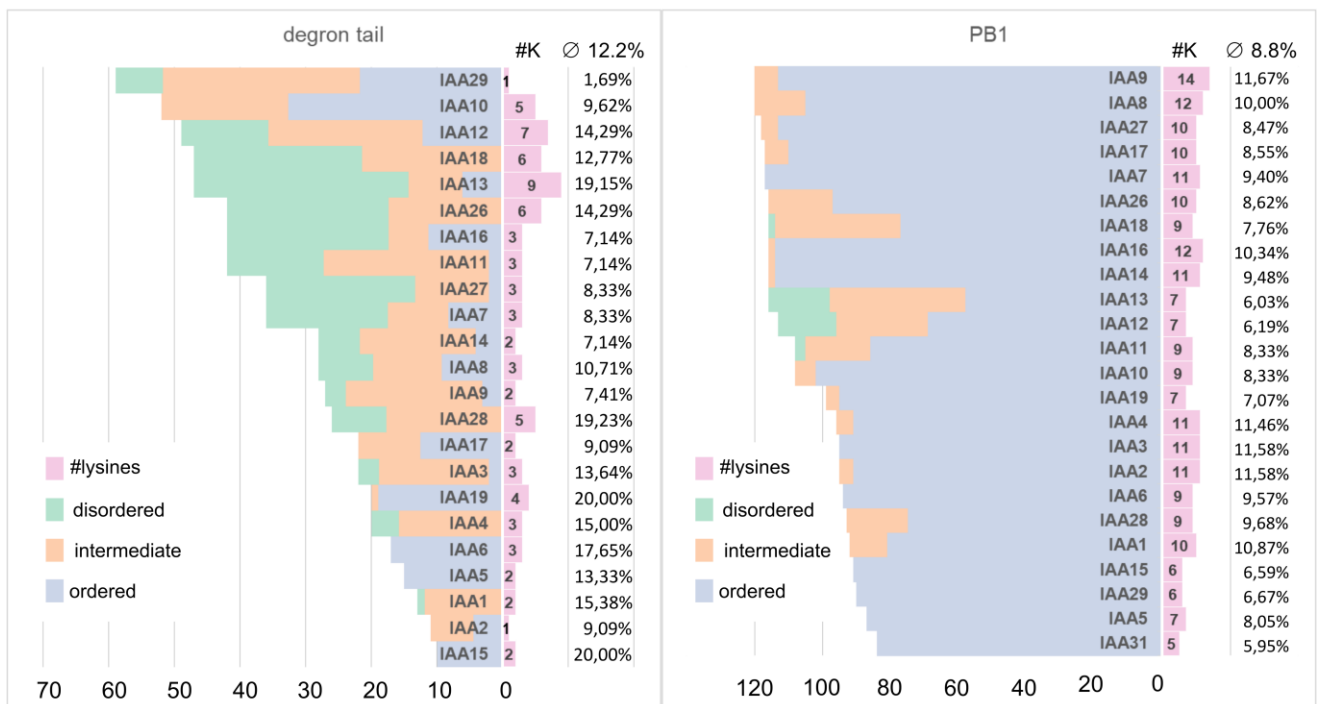

Average lysine content in total: ~9 %

**Supplementary Figure 14| Disorder probability and lysine content in different regions of the canonical *AtAUX/IAA* proteins.** IUPred2A-based prediction for disordered (green), intermediate (orange) and ordered (blue) amino acid residues is shown. Length in AUX/IAA IDRs partially correlate with lysine content and/or disorder. AUX/IAAs with less than 5 lysine residues (pink) in the degron tail show increased lysine content in the PB1 domain ( $\geq 10$ ). AUX/IAA degron tails are enriched in ubiquitin acceptors sites (lysine residues, average 12.2% of total residues).

**Suppl. Table 2. Crosslinking-based docking by HADDOCK**

| Input                                               | # grouped refined structures | group          | # structures per group | HADDOCK scores | Buried surface   | Van der Waals energy | Electrostatic energy | Restraint violation |
|-----------------------------------------------------|------------------------------|----------------|------------------------|----------------|------------------|----------------------|----------------------|---------------------|
| ASK1·TIR1·IAA7<br>without degron<br>tail restraint  | 175                          | 1              | 124                    | -75.7 +/- 4.6  | 1390.6 +/- 29.4  | -37.9 +/- 3.1        | -279.1 +/- 15.2      | 2.5 +/- 0.72        |
|                                                     |                              | 2              | 24                     | -63.8 +/- 10.8 | 1503.0 +/- 127.2 | -47.9 +/- 8.8        | -214.5 +/- 95.6      | 2.7 +/- 1.50        |
|                                                     |                              | 6              | 5                      | -59.4 +/- 10.2 | 1627.6 +/- 95.8  | -46.7 +/- 6.5        | -210.5 +/- 15.6      | 2.3 +/- 1.02        |
|                                                     |                              | 3              | 10                     | -53.6 +/- 9.1  | 1451.2 +/- 59.6  | -32.4 +/- 6.2        | -265.6 +/- 60.2      | 1.6 +/- 0.53        |
|                                                     |                              | 5              | 6                      | -46.7 +/- 7.6  | 1019.5 +/- 31.2  | -38.8 +/- 3.9        | -127.3 +/- 32.5      | 2.5 +/- 0.56        |
|                                                     |                              | 4              | 6                      | -34.2 +/- 7.4  | 1031.6 +/- 41.0  | -22.7 +/- 2.5        | -234.4 +/- 27.5      | 2.1 +/- 0.54        |
|                                                     |                              | 2              | 72                     | -89.1 +/- 2.5  | 1689.6 +/- 146.4 | -43.5 +/- 3.0        | -419.7 +/- 33.1      | 3.2 +/- 0.84        |
|                                                     |                              | 1              | 121                    | -66.7 +/- 9.3  | 1395.2 +/- 162.7 | -33.5 +/- 3.8        | -272.7 +/- 39.0      | 1.6 +/- 0.36        |
|                                                     |                              | 2              | 18                     | -76.3 +/- 10.0 | 1588.8 +/- 70.0  | -38.1 +/- 4.8        | -293.4 +/- 45.0      | 2.5 +/- 0.44        |
|                                                     |                              | 1              | 47                     | -67.1 +/- 12.1 | 990.6 +/- 15.7   | -30.3 +/- 1.6        | -260.0 +/- 31.6      | 1.9 +/- 0.62        |
| ASK1·TIR1·IAA12<br>without degron<br>tail restraint | 132<br>in 13 groups          | 4              | 9                      | -66.8 +/- 4.0  | 1548.8 +/- 140.0 | -44.8 +/- 11.7       | -257.4 +/- 46.3      | 2.6 +/- 0.39        |
|                                                     |                              | 9              | 5                      | -66.5 +/- 10.6 | 1090.0 +/- 38.5  | -23.9 +/- 1.4        | -381.9 +/- 33.2      | 3.1 +/- 1.26        |
|                                                     |                              | 8              | 5                      | -61.5 +/- 22.4 | 1218.9 +/- 164.4 | -27.5 +/- 5.4        | -404.8 +/- 62.1      | 2.5 +/- 0.69        |
|                                                     |                              | 11             | 5                      | -51.9 +/- 4.1  | 1425.8 +/- 80.1  | -29.5 +/- 2.0        | -357.4 +/- 35.3      | 2.0 +/- 0.69        |
|                                                     |                              | 10             | 5                      | -45.7 +/- 5.6  | 1434.8 +/- 70.1  | -38.3 +/- 3.4        | -230.4 +/- 29.4      | 1.9 +/- 0.33        |
|                                                     |                              | 7              | 6                      | -41.5 +/- 3.5  | 1129.3 +/- 38.6  | -27.1 +/- 2.5        | -267.7 +/- 10.3      | 2.0 +/- 0.99        |
|                                                     |                              | 3              | 10                     | -35.6 +/- 3.7  | 1193.6 +/- 31.5  | -30.6 +/- 1.7        | -89.6 +/- 21.8       | 2.9 +/- 0.74        |
|                                                     |                              | 13             | 4                      | -33.1 +/- 8.6  | 1161.6 +/- 120.1 | -24.3 +/- 4.5        | -207.1 +/- 21.8      | 1.9 +/- 0.42        |
|                                                     |                              | 1              | 187                    | -94.2 +/- 9.9  | 1619.0 +/- 85.6  | -35.4 +/- 2.4        | -469.4 +/- 48.7      | 1.8 +/- 0.30        |
|                                                     |                              | 3              | 4                      | -59.8 +/- 14.5 | 1541.9 +/- 116.0 | -40.6 +/- 2.8        | -252.6 +/- 58.2      | 2.8 +/- 0.44        |
| 2                                                   | 5                            | -53.9 +/- 10.2 | 1429.8 +/- 104.0       | -38.0 +/- 4.5  | -229.1 +/- 35.9  | 3.0 +/- 1.58         |                      |                     |
| ASK1·TIR1·IAA12<br>with degron tail<br>restraint    | 196                          |                |                        |                |                  |                      |                      |                     |

**Supp. Table 3. Per-residue energy contributions to the formation of the TIR1·PB1 complexes**

| Complexes | TIR1 Residues | Conservation within 21 TIR1/AFB-like proteins | prEFED protocol                               |                                               | CAS protocol                                    |                                                 |
|-----------|---------------|-----------------------------------------------|-----------------------------------------------|-----------------------------------------------|-------------------------------------------------|-------------------------------------------------|
|           |               |                                               | $\Delta G_{sc}$ (kcal/mol) GB <sup>OBC1</sup> | $\Delta G_{sc}$ (kcal/mol) GB <sup>OBC2</sup> | $\Delta \Delta G$ (kcal/mol) GB <sup>OBC1</sup> | $\Delta \Delta G$ (kcal/mol) GB <sup>OBC2</sup> |
| TIR1·IAA7 | D170          | 5 (+8)                                        | -3.746 +/- 1.11                               | -5.317 +/- 1.32                               | -13.678 +/- 2.06                                | -16.533 +/- 2.36                                |
|           | R220          | 9 (+4)                                        | -6.543 +/- 1.35                               | -6.975 +/- 1.46                               | -9.585 +/- 2.29                                 | -10.623 +/- 2.54                                |
|           | D119          | 19                                            | -2.264 +/- 0.76                               | -3.364 +/- 0.98                               | -8.632 +/- 1.48                                 | -10.414 +/- 1.86                                |
|           | H174          | 2                                             | -4.902 +/- 0.85                               | -5.418 +/- 0.97                               | -7.387 +/- 1.57                                 | -8.255 +/- 1.78                                 |
|           | S172          | 5                                             | -4.011 +/- 0.62                               | -4.241 +/- 0.65                               | -6.671 +/- 1.23                                 | -7.447 +/- 1.28                                 |
|           | S199          | 2                                             | -3.103 +/- 1.23                               | -3.375 +/- 1.30                               | -4.558 +/- 2.04                                 | -5.032 +/- 2.18                                 |
|           | H178          | 1 (+3)                                        | -2.841 +/- 0.59                               | -3.041 +/- 0.64                               | -2.899 +/- 0.95                                 | -3.160 +/- 1.02                                 |
|           | V171          | 1                                             | -2.536 +/- 0.49                               | -2.278 +/- 0.51                               | -2.483 +/- 0.90                                 | -2.099 +/- 0.95                                 |
|           | E197          | 11 (+4)                                       | 2.437 +/- 1.07                                | 2.331 +/- 1.22                                | -0.149 +/- 2.73                                 | -0.807 +/- 3.14                                 |
|           | D146          | 8 (+2)                                        | 1.988 +/- 0.89                                | 1.959 +/- 0.88                                | 0.709 +/- 1.34                                  | 0.385 +/- 1.55                                  |
|           | K226          | 2                                             | 0.685 +/- 0.56                                | 1.077 +/- 0.91                                | -                                               | -                                               |
|           | TIR1·IAA12    | R205                                          | 6 (+2)                                        | -7.99 +/- 0.90                                | -7.662 +/- 1.00                                 | -15.253 +/- 1.84                                |
| R156      |               | 19 (+2)                                       | -7.44 +/- 0.97                                | -7.555 +/- 1.05                               | -11.491 +/- 1.88                                | -12.437 +/- 1.99                                |
| H174      |               | 2                                             | -4.267 +/- 1.52                               | -5.195 +/- 1.98                               | -9.27 +/- 2.46                                  | -10.690 +/- 2.89                                |
| S201      |               | 2                                             | -4.058 +/- 0.60                               | -4.508 +/- 0.64                               | -7.689 +/- 1.15                                 | -8.963 +/- 1.23                                 |
| S199      |               | 2                                             | -3.942 +/- 1.15                               | -4.439 +/- 1.18                               | -7.448 +/- 2.19                                 | -8.731 +/- 2.36                                 |
| H178      |               | 1 (+3)                                        | -1.706 +/- 0.93                               | -2.27 +/- 1.15                                | -4.349 +/- 1.78                                 | -5.392 +/- 2.09                                 |
| S177      |               | 11 (+2)                                       | -1.521 +/- 1.32                               | -1.738 +/- 1.40                               | -2.833 +/- 2.32                                 | -3.307 +/- 2.54                                 |
| K130      |               | 2 (+1)                                        | -1.041 +/- 1.27                               | -0.877 +/- 1.18                               | -1.745 +/- 2.72                                 | -1.658 +/- 2.82                                 |
| S196      |               | 5 (+2)                                        | -1.247 +/- 0.41                               | -1.281 +/- 0.47                               | -1.286 +/- 0.66                                 | -1.423 +/- 0.78                                 |
| V171      |               | 1                                             | -1.784 +/- 0.38                               | -1.548 +/- 0.41                               | -0.767 +/- 0.87                                 | -0.459 +/- 0.94                                 |
| A153      |               | 5                                             | -1.259 +/- 0.24                               | -1.286 +/- 0.24                               | -                                               | -                                               |
| D170      |               | 5 (+8)                                        | 0.459 +/- 0.16                                | 0.059 +/- 0.23                                | -                                               | -                                               |

**Supplementary Table 3| Energy contribution of single amino acids to TIR1·AUX/IAA complex formation.** Conservation of residues was checked in

TIR1/AFB-like proteins in *Arabidopsis thaliana* (uniprot ID: Q570C0, Q9ZR12, Q9LW29, Q9LPW7, A0A178UVM5, A0A178UB83), *Selaginella moellendorffii* (uniprot ID: D8RF91, D8SDE6, D8SG63, D8R5Z3), *Physcomitrella patens* (uniprot ID: A9SYG2, A9TAY1, A9T980, A9SZ50, A9TE08, A9TP16), *Oryza sativa* (uniprot ID: Q0DKP3, Q7XVM8, Q2R3K5, Q8H7P5) and *Marchantia polymorpha* (uniprot ID: A0A2R6WBN4).



## References

- 1 Uversky, V. N. Natively unfolded proteins: a point where biology waits for physics. *Protein Sci* **11**, 739-756, doi:10.1110/ps.4210102 (2002).
- 2 Hamdi, K. *et al.* Structural disorder and induced folding within two cereal, ABA stress and ripening (ASR) proteins. *Sci Rep* **7**, 15544, doi:10.1038/s41598-017-15299-4 (2017).
- 3 Uversky, V. N. What does it mean to be natively unfolded? *Eur J Biochem* **269**, 2-12, doi:10.1046/j.0014-2956.2001.02649.x (2002).
- 4 Wend, S. *et al.* A quantitative ratiometric sensor for time-resolved analysis of auxin dynamics. *Sci Rep* **3**, 2052, doi:10.1038/srep02052 (2013).
